# Supplementary material
Source: PubMed Central journal article supplement (PMC11477092)
Supplement: ehp14300.s001.acco.pdf [file ehp14300.s001.acco.pdf]

**Note to readers with disabilities:** *EHP* strives to ensure that all journal content is accessible to all readers. However, some figures and Supplemental Material published in *EHP* articles may not conform to [508 standards](#) due to the complexity of the information being presented. If you need assistance accessing journal content, please contact [ehpsubmissions@niehs.nih.gov](mailto:ehpsubmissions@niehs.nih.gov). Our staff will work with you to assess and meet your accessibility needs within 3 working days.

### **Supplemental Material**

#### **Temperature, Crime, and Violence: A Systematic Review and Meta-Analysis**

Hayon Michelle Choi, Seulkee Heo, Damien Foo, Yimeng Song, Rory Stewart, Jiyoung Son, and Michelle L. Bell

#### **Table of Contents**

**Table S1.** Search strategies and initial results for systematic literature review of the association between temperature, crime and violence, organized by database.

**Table S2.** Criteria for the risk of bias assessment for included studies, adapted from the Office of Health Assessment and Translation (OHAT), for systematic literature review of the association between temperature, crime and violence.

**Table S3.** Summary of the included studies for systematic literature review of the association between temperature, crime and violence.

**Table S4.** Summary of the association of the included studies for systematic literature review of the association between temperature, crime and violence.

**Table S5.** The summary of association of the included studies for systematic literature review of the association between temperature, crime and violence by geographical locations.

**Table S6.** Heat map for risk of bias rating and quality rating for the included studies for systematic literature review of the association between temperature, crime and violence.

**Table S7.** Details of risk of bias assessment for included studies for systematic literature review of the association between temperature, crime and violence.

**Table S8.** Summary of the studies included in meta-analysis and sensitivity analysis for systematic literature review of the association between temperature, crime and violence.

**Figure S1.** Flowchart of the study selection for systematic literature review of the association between temperature, crime and violence.

**Figure S2.** Contour-enhanced funnel plot analysis on the detection of publication bias in the meta-analysis of the short-term association between temperature and (A) violent crime and (B) property crime with background color indicating the significance of the studies ( $P \geq 0.05$ : white background;  $P < 0.05$ : dark blue;  $P < 0.025$ : blue;  $P < 0.01$ : light blue).

**Figure S3.** Contour-enhanced funnel plot analysis on the detection of publication bias in the meta-analysis of the short-term association between temperature and assault and homicide (A and B for assault and homicide, respectively) and C for long-term homicide, with background color indicating the significance of the studies ( $P \geq 0.05$ : white background;  $P < 0.05$ : dark blue;  $P < 0.025$ : blue;  $P < 0.01$ : light blue).

## References

**Table S1.** Search strategies and initial results for systematic literature review of the association between temperature, crime and violence, organized by database

| #                                                                                                                                      | Query                                                                                                                                                                                                                                                                                                                                                         | # of identified articles |
|----------------------------------------------------------------------------------------------------------------------------------------|---------------------------------------------------------------------------------------------------------------------------------------------------------------------------------------------------------------------------------------------------------------------------------------------------------------------------------------------------------------|--------------------------|
| <b>Ovid MEDLINE(R) and Epub Ahead of Print, In-Process, In-Data-Review, and Other Non-Indexed Citations (1946 to November 6, 2023)</b> |                                                                                                                                                                                                                                                                                                                                                               |                          |
| 1                                                                                                                                      | (crime* or criminal* or criminolog* or violen* or gun or guns or gunshot* or homicide* or burglar* or robber* or theft* or aggression or bullying or firearm* or imprison* or riot* or assault* or pedophil* or paedophil* or manslaughter* or misdemeano* or felon*).mp.                                                                                     | 253,723                  |
| 2                                                                                                                                      | exp violence/ or "Wounds and Injuries"/ or firearms/ or Wounds, Gunshot/                                                                                                                                                                                                                                                                                      | 209,468                  |
| 3                                                                                                                                      | judgement/ or social perception/                                                                                                                                                                                                                                                                                                                              | 45,352                   |
| 4                                                                                                                                      | crime/ or homicide/ or theft/ or aggression/ or bullying/                                                                                                                                                                                                                                                                                                     | 74,276                   |
| 5                                                                                                                                      | prisons/ or prisoners/                                                                                                                                                                                                                                                                                                                                        | 25,278                   |
| 6                                                                                                                                      | (prison* or incarcerat*).mp.                                                                                                                                                                                                                                                                                                                                  | 42,262                   |
| 7                                                                                                                                      | (climat* or temperature* or thermal* or heat* or weather).mp.                                                                                                                                                                                                                                                                                                 | 1,554,405                |
| 8                                                                                                                                      | weather/ or extreme weather/ or exp temperature/                                                                                                                                                                                                                                                                                                              | 463,373                  |
| 9                                                                                                                                      | (1 or 2 or 3 or 4 or 5 or 6) and (7 or 8)                                                                                                                                                                                                                                                                                                                     | 7,632                    |
| 10                                                                                                                                     | animals.sh.                                                                                                                                                                                                                                                                                                                                                   | 7,342,130                |
| 11                                                                                                                                     | humans.sh.                                                                                                                                                                                                                                                                                                                                                    | 21,566,059               |
| 12                                                                                                                                     | 10 not 11                                                                                                                                                                                                                                                                                                                                                     | 5,133,194                |
| 13                                                                                                                                     | 9 not 12                                                                                                                                                                                                                                                                                                                                                      | 6,724                    |
| <b>Web of Science Core Collection (1891 to November 6, 2023)</b>                                                                       |                                                                                                                                                                                                                                                                                                                                                               |                          |
|                                                                                                                                        | TOPIC (crime* or criminal* or criminolog* or violen* or gun or guns or gunshot* or homicide* or burglar* or robber* or theft* or aggression or bullying or firearm* or imprison* or riot* or assault* or pedophil* or paedophil* or manslaughter* or misdemeano* or felon* or prison* or incarcerat*) and TOPIC (climat* or temperature* or heat* or weather) | 11,254                   |

**Table S2.** Criteria for the risk of bias assessment for included studies, adapted from the Office of Health Assessment and Translation (OHAT), for systematic literature review of the association between temperature, crime and violence<sup>1</sup>

| Bias            | Domains                                   | Ratings                                                                                                                              |                                                                                                                                                                                                                                                                                                                                                                                                                                                                                                 |
|-----------------|-------------------------------------------|--------------------------------------------------------------------------------------------------------------------------------------|-------------------------------------------------------------------------------------------------------------------------------------------------------------------------------------------------------------------------------------------------------------------------------------------------------------------------------------------------------------------------------------------------------------------------------------------------------------------------------------------------|
| Key<br>Criteria | Detection bias,<br>exposure<br>assessment | <b>Can we be confident in the exposure characterization?</b>                                                                         |                                                                                                                                                                                                                                                                                                                                                                                                                                                                                                 |
|                 |                                           | Low                                                                                                                                  | There is direct evidence that the exposure was consistently assessed using direct measurements from the monitoring station or using a universally used modeled exposure dataset (e.g., MODIS, gridMET) with a low risk of exposure misclassification. (e.g., assessed exposure at a daily level using a validated data source).                                                                                                                                                                 |
|                 |                                           | Probably low                                                                                                                         | There is indirect evidence that exposure was consistently assessed using direct measurements from the monitoring station or using a universally used modeled exposure dataset (e.g., MODIS, gridMET) with a low risk of exposure misclassification. (e.g., assessed exposure using a validated data source but did not explicitly state the validation).                                                                                                                                        |
|                 |                                           | Probably high                                                                                                                        | There is indirect evidence that the exposure was assessed not using direct measurements from the monitoring station or modeled dataset, which could introduce a high risk of exposure misclassification (e.g., exposure assessment was based on a yearly average and did not account for time-varying temperature exposure) OR There is insufficient information provided about the exposure assessment, including validity and reliability, but no evidence for concern about the method used. |
|                 | High                                      | There is direct evidence that the exposure was assessed using methods with poor validity and evidence of exposure misclassification. |                                                                                                                                                                                                                                                                                                                                                                                                                                                                                                 |
|                 | Detection bias,<br>outcome<br>assessment  | <b>Can we be confident in the outcome assessment?</b>                                                                                |                                                                                                                                                                                                                                                                                                                                                                                                                                                                                                 |
|                 |                                           | Low                                                                                                                                  | There is direct evidence that the outcome data are from a reliable data source (providing a specific link or citing the data source) and defined based on the same standard diagnosis criteria (e.g., police department using the same definition). Studies provide evidence of quality assurance of outcome data.                                                                                                                                                                              |
|                 |                                           | Probably low                                                                                                                         | There is indirect evidence that the outcome was assessed from a reliable data source and defined based on similar standard diagnosis criteria (e.g., Studies aggregating different definitions of crime using various cities/countries). It is deemed that the outcome assessment methods used would not appreciably bias results (e.g., no direct evidence that the date of crime/violence was correctly recorded and not falsified).                                                          |

|                |                  |                                                                                                                                                     |                                                                                                                                                                                                                                                                                                                                                                                                     |
|----------------|------------------|-----------------------------------------------------------------------------------------------------------------------------------------------------|-----------------------------------------------------------------------------------------------------------------------------------------------------------------------------------------------------------------------------------------------------------------------------------------------------------------------------------------------------------------------------------------------------|
|                |                  | Probably high                                                                                                                                       | There is indirect evidence that the outcome assessment method is an insensitive instrument.<br>OR There is insufficient information provided to judge that crime/violence was correctly recorded.                                                                                                                                                                                                   |
|                |                  | High                                                                                                                                                | There is direct evidence that the outcome assessment method is an insensitive instrument.<br>Outcome data stem from unofficial sources (e.g. unofficial reports), which are very likely to show inaccurate data.                                                                                                                                                                                    |
|                | Confounding bias | <b>Did the study design or analysis account for important confounding and modifying variables?</b>                                                  |                                                                                                                                                                                                                                                                                                                                                                                                     |
|                |                  | Low                                                                                                                                                 | The study accounted for all important confounders, which were measured consistently (e.g., time trend and season, day of the week, air pollution, latitude, and public holiday) in the final analyses through the use of statistical models to reduce research-specific bias. There is direct evidence that primary covariates and confounders were assessed using valid and reliable measurements. |
|                |                  | Probably low                                                                                                                                        | The study accounted for most of the important confounders (e.g., time trend and season, day of the week, air pollution, latitude, and public holiday) AND is not expected to introduce bias.                                                                                                                                                                                                        |
|                |                  | Probably high                                                                                                                                       | The study accounted for some but not all confounders (e.g., only the time trend) AND is expected to introduce bias.                                                                                                                                                                                                                                                                                 |
|                | High             | The study did not account for potential confounders OR were inappropriately measured.                                                               |                                                                                                                                                                                                                                                                                                                                                                                                     |
| Other criteria | Selection bias   | <b>Did the selection of study participants appropriate?</b>                                                                                         |                                                                                                                                                                                                                                                                                                                                                                                                     |
|                |                  | Low                                                                                                                                                 | The descriptions of the studied population were sufficiently detailed to support the assertion that the risk of selection effects was minimal (e.g., study participants in different exposure levels and with all outcomes had equal opportunity to be included in the study).                                                                                                                      |
|                |                  | Probably low                                                                                                                                        | There is insufficient information about population selection to permit a judgment of a low risk of bias, but there is indirect evidence that suggests a low risk of bias (e.g., study participants in different exposure levels may not have equal opportunity to be in the study).                                                                                                                 |
|                |                  | Probably high                                                                                                                                       | There is insufficient information about population selection to permit a judgment of a high risk of bias, but there is indirect evidence that suggests high risk of bias (e.g., participants in all exposure levels did not have equal opportunity to be in the study, but not to the extent that seriously bias the effect estimates).                                                             |
|                | High             | There were indications from descriptions of the studied population of high risk of bias (study only included designated high-risk participants, and |                                                                                                                                                                                                                                                                                                                                                                                                     |

|                          |                                                                                                                                              |                                                                                                                                                                                                                                            |
|--------------------------|----------------------------------------------------------------------------------------------------------------------------------------------|--------------------------------------------------------------------------------------------------------------------------------------------------------------------------------------------------------------------------------------------|
|                          |                                                                                                                                              | participants in all exposure levels did not have equal opportunity to be in the study, to the extent that effect estimates were seriously biased) (e.g. plots of time series showing unusual patterns).                                    |
| Attrition/exclusion bias | <b>Were outcome data complete without attrition or exclusion from analysis?</b>                                                              |                                                                                                                                                                                                                                            |
|                          | Low                                                                                                                                          | No missing data irrelevant to the true study outcome and no missing outcome data.                                                                                                                                                          |
|                          | Probably low                                                                                                                                 | Though there was not sufficient information available to evaluate the incomplete data's risk accurately, there was indirect evidence indicating a low risk of bias.                                                                        |
|                          | Probably high                                                                                                                                | Inadequate information was provided to determine whether a risk was high due to incomplete data, but there was indirect evidence to suggest a high risk.                                                                                   |
|                          | High                                                                                                                                         | Direct evidence to suggest that the missing data on outcomes is relevant to the true study outcome.                                                                                                                                        |
| Selective reporting bias | <b>Did the study report all measured outcomes?</b>                                                                                           |                                                                                                                                                                                                                                            |
|                          | Low                                                                                                                                          | The study reported findings on all pre-specified outcomes. This would include outcomes reported with sufficient detail to be included in meta-analysis or fully tabulated during data extraction and analyses had been planned in advance. |
|                          | Probably low                                                                                                                                 | Inadequate information was provided to determine whether a risk of selective outcome was low, but there was indirect evidence to suggest that the study was not selectively reported.                                                      |
|                          | Probably high                                                                                                                                | Inadequate information was provided to determine whether a risk of selective outcome was low, but there was indirect evidence to suggest that the study was selectively reported.                                                          |
|                          | High                                                                                                                                         | The study did not report findings on all pre-specified outcomes, or used methods that were not pre-specified to analyze one/more of the primary outcomes or report the outcomes/findings that were not pre-specified.                      |
| Conflict of interest     | <b>Was there potential bias in the reporting through financial sources?</b>                                                                  |                                                                                                                                                                                                                                            |
|                          | Low                                                                                                                                          | No funding was received for this study from entities with a financial interest in the study outcomes.                                                                                                                                      |
|                          | Probably low                                                                                                                                 | Inadequate information provided to determine a low risk, but there was indirect evidence to suggest that the study had no financial interest.                                                                                              |
|                          | Probably high                                                                                                                                | Inadequate information provided to determine a low risk, but there was indirect evidence to suggest that the study had financial interest.                                                                                                 |
|                          | High                                                                                                                                         | Support was received for this study from entities with a financial interest in the study outcomes.                                                                                                                                         |
| Other sources of bias    | <b>Bias from other sources not covered elsewhere (statistical methodological appropriateness, researcher compliance with study protocol)</b> |                                                                                                                                                                                                                                            |
|                          | Low                                                                                                                                          | No other sources of bias.                                                                                                                                                                                                                  |

|  |  |               |                                                                                                                                           |
|--|--|---------------|-------------------------------------------------------------------------------------------------------------------------------------------|
|  |  | Probably low  | Inadequate information provided to determine a low risk, but there was indirect evidence to suggest that the study had no other problems. |
|  |  | Probably high | Inadequate information provided to determine a low risk, but there was indirect evidence to suggest that the study had other problems     |
|  |  | High          | At least one important bias detected from other sources.                                                                                  |

**Table S3.** Summary of the included studies for systematic literature review of the association between temperature, crime and violence

| Author/Publication                              | Location                    | Study period | Study season | Exposure temporal scale | Exposure methods | Outcome                                                           | Statistical model            | Estimates (for 1°C unless otherwise specified)                                                                                               |
|-------------------------------------------------|-----------------------------|--------------|--------------|-------------------------|------------------|-------------------------------------------------------------------|------------------------------|----------------------------------------------------------------------------------------------------------------------------------------------|
| Algahtany, Kumar et al. 2022 <sup>2</sup>       | 2 provinces in Saudi Arabia | 2004-2010    | all season   | monthly                 | monitors         | Assault, theft, homicide, sexual assault, alcohol, and drug       | Multiple regression models   | Effect estimates of 0.739 (standard error (se): 0.347) and 2.275 (se: 0.649) for temperature and assault in Makkah and Riyadh, respectively. |
| Annan-Phan and Ba 2023 <sup>3</sup>             | U.S.                        | 2000-2016    | all season   | monthly                 | modeled          | Violent crimes, number of assaulted officers, and civilian deaths | Poisson regression model     | Violent crimes and the number of officers assaulted or killed increase on warmer days ( $\geq 17^{\circ}\text{C}$ ).                         |
| Auliciems and DiBartolo 1995 <sup>4</sup>       | Brisbane, Australia         | 1992         | all season   | daily                   | monitors         | Number of police calls                                            | Poisson regression model     | Effect estimates of 0.46 for number of police calls and maximum air temperature during all seasons.                                          |
| Baryshnikova, Davidson et al. 2022 <sup>5</sup> | 4 cities in USA             | 2014-2017    | all season   | hourly                  | monitors         | Violent crime and property crime                                  | Linear regression model      | Effect estimates of 0.009 (se: 0.001) and 0.006 (se: 0.001) for temperature and violent crime and property crime, respectively.              |
| Berman, Bayham et al. 2020 <sup>6</sup>         | 436 counties in USA         | 2000-2013    | all season   | daily                   | modeled          | Violent crime and property crime                                  | Two-stage hierarchical model | Each 10 °C increase in daily mean temperature is                                                                                             |



|                                        |                                |           |                      |          |          |                                  |                                                                                                                  |                                                                                                                                                          |
|----------------------------------------|--------------------------------|-----------|----------------------|----------|----------|----------------------------------|------------------------------------------------------------------------------------------------------------------|----------------------------------------------------------------------------------------------------------------------------------------------------------|
|                                        |                                |           |                      |          |          |                                  |                                                                                                                  | associated with an 11.92% (95% PI: 11.57, 12.27) and 6.14% (95% PI: 5.88, 6.4) relative risk increase in violent crime and property crime, respectively. |
| Bollfrass and Shaver 2015 <sup>7</sup> | South Africa                   | 1989-2008 | all season           | annually | modeled  | Civil war                        | Conditional logistic regression, Bayesian logistic regression, and generalized additive mixed-effects regression | Effect estimates of 0.076 (se:0.011) for temperature and civil war.                                                                                      |
| Butke and Sheridan 2010 <sup>8</sup>   | Cleveland Ohio, USA            | 1999-2004 | summer (June-August) | daily    | monitors | Violent crime                    | Linear regression model                                                                                          | Slop of 2.74 (mean: 64.25) for all aggressive crime counts with apparent temperature.                                                                    |
| Castle and Kovacs <sup>9</sup>         | North Bay, Ontario, Canada     | 2015-2019 | all season           | daily    | monitors | Property and violent crime       | Poisson regression model                                                                                         | Effect estimates of 0.0015 for assaults and 0.0194 for thefts.                                                                                           |
| Chambru 2020 <sup>10</sup>             | Duchy of Savoy, Western Europe | 1749-1792 | all season           | daily    | modeled  | Violent crime and property crime | Multiple regression models                                                                                       | A one standard deviation (5.96) increases in temperature shock increased the incidence of property crimes by 6.9% (se: 0.039) and                        |

|                                                |                                                |           |            |          |           |                                                |                                                          |                                                                                                                                                              |
|------------------------------------------------|------------------------------------------------|-----------|------------|----------|-----------|------------------------------------------------|----------------------------------------------------------|--------------------------------------------------------------------------------------------------------------------------------------------------------------|
|                                                |                                                |           |            |          |           |                                                |                                                          | effect estimates of -0.087 (se: 0.039) for violent crime.                                                                                                    |
| Churchill, Smyth, and Trinh 2023 <sup>11</sup> | Australia                                      | 2001-2019 | all season | monthly  | satellite | Total crime, property crime, and violent crime | Multiple regression models                               | Effect estimates of 0.011 (se: 0.004) for total crime, 0.007 (se: 0.006) for violent crime, and 0.010 (se: 0.005) for property crime with temperature shock. |
| Cohn and Rotton 2000 <sup>12</sup>             | Minneapolis, USA                               | 1987-1988 | all season | daily    | monitors  | Property crime                                 | Hierarchical model and ordinary least squares regression | Effect estimates of 0.2 (b: 0.066), 0.3 (b: 0.058), and 0.2 (b: 0.002) for temperature and theft, burglary, and robbery, respectively.                       |
| Corcoran and Zahnow 2021 <sup>13</sup>         | Brisbane and Queensland, Australia             | 2010-2012 | all season | daily    | monitors  | Assault                                        | Negative binomial multilevel regression                  | Incident rate ratio for daily propensity of assaults of 1.02 (se: 0.003).                                                                                    |
| Cruz, D'Alessio et al, 2023 <sup>14</sup>      | Cleveland, Ohio, USA                           | 2016      | all season | daily    | monitors  | Violent crime                                  | Autoregressive integrated moving average (ARIMA) model   | Effect estimates of 0.125 (T value: 12.675) for maximum daily temperature and violent crime.                                                                 |
| DeFronzo 1984 <sup>15</sup>                    | 142 largest American Metropolitan Areas in USA | 1970-1977 | all season | annually | monitors  | Violent crime and property crime               | Multiple regression model                                | Number of days with temperature above 32.2°C (90°F) had positive associations with homicide and burglary rates.                                              |

|                                                |                              |                                                             |            |                   |          |                                                                        |                                         |                                                                                                                                         |
|------------------------------------------------|------------------------------|-------------------------------------------------------------|------------|-------------------|----------|------------------------------------------------------------------------|-----------------------------------------|-----------------------------------------------------------------------------------------------------------------------------------------|
| FIELD 1992 <sup>16</sup>                       | England and Wales, UK        | monthly: 1977-1987, quarterly: 1969-1988, annual: 1947-1987 | all season | monthly, annually | monitors | Sexual offence, burglary, theft, and property crime                    | Linear regression model                 | Effect estimates of 0.012 (se: 0.0021) for violent crime and temperature.                                                               |
| Gamble and Hess 2012 <sup>17</sup>             | Dallas, Texas, USA           | 1993-1999                                                   | all season | daily             | monitors | Assault, murder, and rape                                              | Ordinary Least Squares regression model | Daily mean ambient temperature had a positive relationship with crime beyond temperatures of 80°F and then turned negative beyond 90°F. |
| Gates, Klein et al. 2019 <sup>18</sup>         | South Africa                 | 1997-2013                                                   | all season | daily             | monitors | Homicide                                                               | Conditional logistic regression         | Odds ratio for homicide is 1.021 (95% CI: 1.017, 1.024) for lag 0 mean temperature.                                                     |
| Heilmann, Kahn et al. 2021 <sup>19</sup>       | Los Angeles, California, USA | 2010-2017                                                   | all season | daily             | monitors | Violent crime, property crime, domestic, and intimate partner violence | Poisson regression model                | Days with 75°F maximum temperature experience 1.72% more crime than the days that were not.                                             |
| Hodgkinson, Corcoran et al. 2023 <sup>20</sup> | Queensland, Australia        | 2008-2019                                                   | all season | daily             | monitors | Violent crime                                                          | Negative binomial regression model      | Effect estimates of 0.024 (se: 0.015) for association between violent crime and temperature trend in arid regions.                      |
| Hou, Zhang et al. 2023 <sup>21</sup>           | Chicago in Illinois, USA     | 2011-2017                                                   | all season | daily             | monitors | Urban crime                                                            | Generalized additive model (GAM)        | Relative risk (5.2°C vs 97.5 <sup>th</sup> percentile (27.5°C)) of 1.36 (95% CI: 1.31, 1.42)                                            |

|                                      |                    |           |            |         |          |                                                                     |                                                                         |                                                                                                                                                     |
|--------------------------------------|--------------------|-----------|------------|---------|----------|---------------------------------------------------------------------|-------------------------------------------------------------------------|-----------------------------------------------------------------------------------------------------------------------------------------------------|
|                                      |                    |           |            |         |          |                                                                     |                                                                         | non-domestic urban crime (UC) risk.                                                                                                                 |
| Hu, Wu et al. 2017 <sup>22</sup>     | Tangshan, China    | 2009-2014 | all season | monthly | modeled  | Homicide, assault, rape, robbery, burglary, and motor vehicle theft | Linear regression model                                                 | There were strong positive correlations between temperature and both violent and property crimes.                                                   |
| Jung, Kim et al. 2020 <sup>23</sup>  | Seoul, South Korea | 2015      | all season | weekly  | monitors | Assault                                                             | Generalized linear mixed models                                         | 1°C increase in weekly mean temperature was associated with a 1.1% increase in weekly assault counts (Odds Ratio (OR): 1.101 (95% CI: 1.09, 1.11)). |
| Jung, Chun et al. 2020 <sup>24</sup> | Seoul, South Korea | 2014-2016 | all season | monthly | monitors | Assault                                                             | Poisson regression model                                                | Effect estimates of 0.0077 (Lower and Upper: 0.0030, 0.0122) for association between monthly temperature and assault.                               |
| Kim, Kim et al. 2023 <sup>25</sup>   | Seoul, South Korea | 1991-2020 | all season | daily   | monitors | Assault deaths                                                      | Time-stratified case-crossover analysis                                 | Odds ratio of 1.025 (95% CI: 1.005, 1.045) for assault deaths in warm season.                                                                       |
| Le, Berman et al. 2022 <sup>26</sup> | Hanoi, Vietnam     | 2013-2019 | all season | daily   | monitors | Violent crime and property crime                                    | Quasi-Poisson regression with distributed lag non-linear models (DLNMs) | Percentage increases for each 5°C increase in temperature is 10.4 (95% CI: 0.7, 21.1) and 7.08 (95% CI: 0.7, 13.7) for violent                      |

|                                              |                                      |                                           |            |                |          |                                                                               |                                                                                |                                                                                                                                                |
|----------------------------------------------|--------------------------------------|-------------------------------------------|------------|----------------|----------|-------------------------------------------------------------------------------|--------------------------------------------------------------------------------|------------------------------------------------------------------------------------------------------------------------------------------------|
|                                              |                                      |                                           |            |                |          |                                                                               |                                                                                | crime and non-violent crime, respectively.                                                                                                     |
| Lemon and Partridge 2017 <sup>27</sup>       | Dorset, UK                           | 2014-2016                                 | all season | daily          | monitors | Assault                                                                       | Negative binomial regression                                                   | Relative risk increases for each 1°C increase in temperature is 1.01 (95% CI: 1.00, 1.02) for assault.                                         |
| Li, Feng et al. 2023 <sup>28</sup>           | 140 countries and regions            | 2000-2019                                 | all season | annual         | modeled  | Homicide (total, female, and male) defined interpersonal violence as homicide | Ordinary least squares regression model                                        | Effect estimates of 0.021 (se: 0.01) for homicide rates.                                                                                       |
| Linning, Andresen et al. 2017 <sup>29</sup>  | Vancouver and Ottawa, Canada         | 2003-2013 (Vancouver), 2006-2008 (Ottawa) | all season | daily, monthly | monitors | Violent crime                                                                 | Ordinary least squares regression model and negative binomial regression model | Study locations with greater variations in weather throughout the year have more distinct increases of property offences in the summer months. |
| Linning, Andresen et al. 2017b <sup>30</sup> | 8 cities in British Columbia, Canada | 2000-2006                                 | all season | monthly        | monitors | Assault, robbery, and motor vehicle theft                                     | Negative binomial and Poisson regression model                                 | Temperature changes impacted assault levels and property crimes.                                                                               |
| Lynch, Stretesky et al. 2020 <sup>31</sup>   | New York, USA and London, UK         | 1985-2015                                 | all season | annually       | monitors | Homicide                                                                      | Ordinary Least Squares regression model                                        | There was a positive correlation between annual homicide rates and temperature.                                                                |
| Lynch, Stretesky et al. 2022 <sup>32</sup>   | 15 cities, USA                       | 2002-2015                                 | all season | annually       | monitors | Homicide, rape, robbery,                                                      | Pearson's correlation                                                          | There was no significant                                                                                                                       |

|                                           |                                                  |           |            |          |          |                                                                      |                                          |                                                                                                                                                                                                         |
|-------------------------------------------|--------------------------------------------------|-----------|------------|----------|----------|----------------------------------------------------------------------|------------------------------------------|---------------------------------------------------------------------------------------------------------------------------------------------------------------------------------------------------------|
|                                           |                                                  |           |            |          |          | assault, burglary, theft, motor vehicle theft, and arson             |                                          | correlation between crime and temperature.                                                                                                                                                              |
| Lyons, Gause et al. 2022 <sup>33</sup>    | 100 cities, USA                                  | 2015-2020 | all season | daily    | monitors | Firearm violence                                                     | Distributed lag nonlinear model          | Attributable risk of 6.85 (95% CI: 6.09, 7.46) for shooting.                                                                                                                                            |
| Mapou, Shendell et al. 2017 <sup>34</sup> | Chicago, Houston, Philadelphia, and Seattle, USA | 2009-2013 | all season | daily    | monitors | Assault, burglary, homicide, motor vehicle theft, robbery, and theft | Poisson regression model                 | Risk ratio for assault of 1.7 (95% CI: 1.32, 2.18), burglary of 1.12 (0.79, 1.6), homicide of 1.85 (0.47, 7.31), and motor vehicle theft of 0.26 (0.17, 0.39) for increase in IQR temperature (18.6°C). |
| Mares 2013 <sup>35</sup>                  | St. Louis, Missouri, USA                         | 1980-2010 | all season | monthly  | monitors | Violent crime                                                        | Negative binomial regression model       | The most disadvantaged group experience about 36% more violent crimes in the warmest months compared to the coldest month.                                                                              |
| Mares 2013b <sup>36</sup>                 | St. Louis, Missouri, USA                         | 1990-2009 | all season | monthly  | monitors | Violent crime and property crime                                     | Maximum likelihood estimation and Q-test | Predicted rate of 0.729% increase per 1 degree Fahrenheit for homicide.                                                                                                                                 |
| Mares and Moffett 2016 <sup>37</sup>      | 57 countries                                     | 1995-2012 | all season | annually | monitors | Homicide                                                             | Multilevel models (MLMs)                 | 1°C increase in annual temperatures was associated with a nearly 6 % (se: 0.0115) average increase in                                                                                                   |

|                                               |                                     |           |            |           |          |                                                         |                                            |                                                                                                                                                                                                                      |
|-----------------------------------------------|-------------------------------------|-----------|------------|-----------|----------|---------------------------------------------------------|--------------------------------------------|----------------------------------------------------------------------------------------------------------------------------------------------------------------------------------------------------------------------|
|                                               |                                     |           |            |           |          |                                                         |                                            | homicides for all nations, effect estimates of 0.164 (se: 0.0872) for Africa, 0.043 (se: 0.043) for Latin America, 0.018 (se: 0.03) for Asia, 0.018 (se: 0.014) for Europe, and 0.028 (se: 0.008) for North America. |
| Mares and Moffett 2019 <sup>38</sup>          | multiple cities and counties in USA | 1960-2013 | all season | monthly   | monitors | Homicide, rape, robbery, assault, burglary, and larceny | Negative binomial regression model         | The study results predict a nearly 1% increase in crime levels for each degree Celsius temperatures rise above monthly average temperature.                                                                          |
| Maystadt, Calderone et al. 2014 <sup>39</sup> | Sudan, North Africa                 | 1997-2009 | all season | quarterly | modeled  | Conflict                                                | Negative binomial regression model         | Temperature anomalies were predicted to strongly affect the risk of conflict.                                                                                                                                        |
| McLean 2007 <sup>40</sup>                     | Manchester, UK                      | 2002      | all season | daily     | monitors | Sexual assault                                          | Spearman correlation and linear regression | Effect estimates of 0.0341 (se: 0.014) for daily incidence of sexual assault.                                                                                                                                        |
| Michel, Wang et al. 2016 <sup>41</sup>        | Baltimore, Maryland, USA            | 2008-2013 | all season | daily     | monitors | Violent crime and homicide                              | Negative binomial regression model         | Incidence rate ratio (IRR) of 1.006 (95% CI: 1.0056, 1.0081) for total crime, 1.0128 (1.0096, 1.016) for violent crime, and 1.010                                                                                    |

|                                                |                                    |                         |            |          |          |                                  |                                                                     |                                                                                      |
|------------------------------------------------|------------------------------------|-------------------------|------------|----------|----------|----------------------------------|---------------------------------------------------------------------|--------------------------------------------------------------------------------------|
|                                                |                                    |                         |            |          |          |                                  |                                                                     | (0.9973, 1.0228) for homicide.                                                       |
| Muzafar Shah 2017 <sup>42</sup>                | Malaysia                           | 1973-2009               | all season | annually | monitors | Violent crime and property crime | Estimated Generalized One-Step Error-Correction Model               | There is a long-term association between crime and temperature.                      |
| O'Loughlin, Linke et al. 2014 <sup>43</sup>    | 42 countries in sub-Saharan Africa | 1980-2012               | all season | monthly  | modeled  | Conflict                         | Poisson regression model                                            | There were associations between extreme temperature and conflict.                    |
| O'Loughlin, Witmer et al. 2012 <sup>44</sup>   | Multiple countries in East Africa  | 1990-2009               | all season | monthly  | modeled  | Conflict                         | Negative binomial regression model                                  | Temperature above average has shown increase in conflict.                            |
| Otrachshenko, Popova et al. 2021 <sup>45</sup> | 79 regions, Russia                 | 1989-2015               | all season | annually | monitors | Violent mortality                | Negative binomial regression model                                  | Hot temperature increased violent mortality, whereas cold temperature had no effect. |
| Pacillo, Kangogo et al. 2022 <sup>46</sup>     | Mali, Africa                       | 2014-2015 and 2017-2018 | all season | 3 months | monitors | Conflict                         | Structural equation modeling (SEM)                                  | Effect estimates of 0.021 (se: 0.006) for total conflicts.                           |
| Peng, Xueming et al. 2011 <sup>47</sup>        | Beijing, China                     | 2004-2005               | all season | hourly   | monitors | Robbery and burglary             | Ordinary Least Squares regression model                             | The slope between temperature and robbery was 0.18 and 1.85 for burglary.            |
| Peng and Zhan 2022 <sup>48</sup>               | 129 prefecture-level cities, China | 2013-2019               | all season | annually | monitors | Criminal arrest                  | Fixed effects model with instrumental variables (IV-FE) and spatial | Extreme climate had a significant positive effect on crime arrest rate.              |



|                                                     |                                                                                  |           |            |         |          |                                                                   |                                         |                                                                                                                                                                                                                                |
|-----------------------------------------------------|----------------------------------------------------------------------------------|-----------|------------|---------|----------|-------------------------------------------------------------------|-----------------------------------------|--------------------------------------------------------------------------------------------------------------------------------------------------------------------------------------------------------------------------------|
|                                                     |                                                                                  |           |            |         |          |                                                                   | Durbin model (SDM)                      |                                                                                                                                                                                                                                |
| Potgieter, Fabris-Rotelli et al. 2022 <sup>49</sup> | Developing township of Khayelitsha, in the Western Cape Province of South Africa | 2006-2016 | all season | daily   | monitors | Violent crime, property crime, and sexual crime                   | Negative binomial regression model      | Relative risk (17°C vs 75 <sup>th</sup> percentile (20.2°C) for all crime is 1.02 (95% CI: 0.99, 1.06), 1.07 (1.03, 1.12) for violent crime, and 0.93 (0.90, 0.96) for property crime, and 1.01 (0.94, 1.09) for sexual crime. |
| Rahman, Lorenzo et al. 2023 <sup>50</sup>           | California, USA                                                                  | 2014-2019 | all season | daily   | modeled  | Homicide                                                          | Case-crossover study design             | Odds ratio is 1.009 (95% CI: 1.002, 1.015) for homicide.                                                                                                                                                                       |
| Ranson 2014 <sup>51</sup>                           | 2,997 counties in the 49 continental US states                                   | 1980-2009 | all season | monthly | monitors | Assault, murder, robbery, motor vehicle theft, burglary, and rape | Poisson regression models               | Effect estimates of 0.006 (se: 0) for aggravated assault and 0.005 (se: 0) for simple assault for temperature over 100°F.                                                                                                      |
| Reeping and Hemenway 2020 <sup>52</sup>             | Chicago, USA                                                                     | 2012-2016 | all season | daily   | monitors | Shooting                                                          | Negative binomial regression model      | A 10-degree higher temperature than average has increased 33.8% higher rate of shootings.                                                                                                                                      |
| Rotton and Cohn 2000 <sup>53</sup>                  | Dallas, Texas, USA                                                               | 1994-1995 | all season | daily   | monitors | Aggravated assault                                                | Ordinary Least Squares regression model | Effect estimates of 0.00516 (se: 0.001214) for aggravated assault.                                                                                                                                                             |
| Rotton and Cohn 2000b <sup>54</sup>                 | Minneapolis, Minnesota, USA                                                      | 1987-1988 | all season | daily   | monitors | Aggravated assault                                                | Generalized least square analysis       | There was an inverse U shape relationship between                                                                                                                                                                              |

|                                                 |                                                        |           |            |       |          |                                                 |                                                            |                                                                                                                              |
|-------------------------------------------------|--------------------------------------------------------|-----------|------------|-------|----------|-------------------------------------------------|------------------------------------------------------------|------------------------------------------------------------------------------------------------------------------------------|
|                                                 |                                                        |           |            |       |          |                                                 |                                                            | temperature and aggravated assault.                                                                                          |
| Ruderman and Cohn 2021 <sup>55</sup>            | Multiple cities in USA                                 | 2014-2019 | all season | daily | monitors | Multiple-victim shooting                        | Poisson regression model                                   | Temperature anomaly alters the MVS rate exponentially by a rate of $0.022 \pm 0.005^{\circ}F^{-1}$ (95% CI 0.013, 0.032)     |
| Sanz-Barbero, Linares et al. 2018 <sup>56</sup> | Madrid, Spain                                          | 2008-2016 | summer     | daily | monitors | Intimate partner violence                       | Poisson regression model                                   | Heat waves were associated with an increase in intimate partner violence.                                                    |
| Schinasi and Hamra 2017 <sup>57</sup>           | Philadelphia in Pennsylvania, USA                      | 2006-2015 | all season | daily | monitors | Violent crime and property crime                | Quasi-Poisson generalized additive model                   | There was a linear and positive relationship between heat index and violent crimes.                                          |
| Schutte and Breetzke 2018 <sup>58</sup>         | Tshwane, South Africa                                  | 2001-2006 | all season | daily | monitors | Violent crime, property crime, and sexual crime | Analysis of variance (ANOVA)                               | There was a strong association with temperature and criminal activity.                                                       |
| Schutte, Breetzke et al. 2021 <sup>59</sup>     | 2 township communities on the Cape Flats, South Africa | 2007-2014 | all season | daily | monitors | Murder, assault, robbery, and rape              | Analysis of variance (ANOVA) and multiple regression model | Temperature increase was associated with assault.                                                                            |
| Shen, Hu et al. 2020 <sup>60</sup>              | Beijing, China                                         | 2005-2016 | all season | daily | monitors | Assault, motor vehicle theft, robbery, and rape | Linear regression model                                    | There was a strong positive linear correlation between the seasonality of temperature and violent robbery, assault and rape. |

|                                                   |                                                               |           |            |                |          |                                                       |                                                                   |                                                                                                                            |
|---------------------------------------------------|---------------------------------------------------------------|-----------|------------|----------------|----------|-------------------------------------------------------|-------------------------------------------------------------------|----------------------------------------------------------------------------------------------------------------------------|
| Sommer, Lee et al. 2018 <sup>61</sup>             | Boston, Massachusetts, USA                                    | 2012-2017 | all season | daily          | monitors | Aggravated assault                                    | Bayesian analysis                                                 | There were more crimes reported on temperate days compared to extremely cold days, and on dry days compared to rainy days. |
| Sorg and Taylor 2011 <sup>62</sup>                | Philadelphia in Pennsylvania, United States                   | 2007-2009 | all season | monthly        | monitors | Robbery                                               | Poisson regression model                                          | Effect estimates of 0.002 (se: 0.0004) for robbery counts.                                                                 |
| Stechemesser, Levermann et al. 2022 <sup>63</sup> | USA                                                           | 2014-2020 | all season | daily          | modeled  | Angry tweets                                          | Panel regression                                                  | Hot temperature is shown to aggravate the aggression online.                                                               |
| Stevens, Beggs et al. 2019 <sup>64</sup>          | 153 local government areas (LGAs), New South Wales, Australia | 2006-2016 | all season | daily, monthly | modeled  | Assault, theft, and fraud                             | Logistic regression                                               | Estimated count of assault was 51 (95% CI: 44, 58), 23 (-6, 52) for theft, and -2 (-16, 12) for fraud.                     |
| Stevens, Graham et al. 2021 <sup>65</sup>         | New South Wales, Australia                                    | 2015-2017 | all season | daily          | monitors | Angry tweets and assaults                             | Multiple regression model with generalized additive models (GAMs) | Coefficient of 0.073 (se: 0.029) for assault and maximum temperature.                                                      |
| Stevens, Graham et al. 2023 <sup>66</sup>         | New South Wales, Australia                                    | 2006-2018 | all season | daily          | modeled  | Domestic crime, non-domestic crime, and sexual crimes | Negative binomial regression                                      | Effect estimates of 5.2 (se: 0.453) for domestic violence inside, 5.146 (se: 0.861) for sexual assault.                    |

|                                                   |                            |           |            |          |          |                                                                                                     |                                  |                                                                                                                                                                  |
|---------------------------------------------------|----------------------------|-----------|------------|----------|----------|-----------------------------------------------------------------------------------------------------|----------------------------------|------------------------------------------------------------------------------------------------------------------------------------------------------------------|
| Takahashi 2017 <sup>67</sup>                      | 47 prefectures, Japan      | 2009-2015 | all season | daily    | monitors | Murder, assault, arson, rape, sexual assault, abduction, robbery, burglary, and motor vehicle theft | Generalized additive model (GAM) | 1°C increase in daily mean temperature was associated with 2.6% increase in violent crimes, 1.5% increase in property crimes, and 1.9% increase in total crimes. |
| Talaei, Hedjazi et al. 2014 <sup>68</sup>         | Mashhad, Iran              | 2006-2010 | all season | daily    | monitors | Rage, homicide, and hospitalization                                                                 | Poisson regression model         | The study has not found significant correlation between homicide and any meteorological variables.                                                               |
| Tiihonen, Halonen et al. 2017 <sup>69</sup>       | Finland                    | 1996-2013 | all season | monthly  | monitors | Violent crime                                                                                       | Poisson regression model         | Increase per degree centigrade is 1.7% (95% CI: 1.1, 2.4) for violent crime rates.                                                                               |
| Tol and Wagner 2010 <sup>70</sup>                 | Multiple countries, Europe | 1568-1648 | all season | annually | modeled  | Conflict                                                                                            | Linear regression model          | Conflict was frequent in cold days.                                                                                                                              |
| Towers, Chen et al. 2018 <sup>71</sup>            | Chicago in Illinois USA    | 2001-2014 | all season | daily    | monitors | Assault, robbery, motor vehicle theft, theft, and burglary                                          | Linear regression models         | Percent change in average incidence of aggravated assault is $0.37 \pm 0.09$ for winter times only.                                                              |
| Trujillo and Howley 2021 <sup>72</sup>            | Barranquilla, Colombia     | 2010-2016 | all season | daily    | monitors | Homicide                                                                                            | Generalized linear model         | Incidence rate ratio of 0.981 (se: 0.022) for homicides.                                                                                                         |
| van de Vliert, Schwartz et al. 1999 <sup>73</sup> | 136 countries              | 1948-1977 | all season | daily    | modeled  | Political violence                                                                                  | Hierarchical regression          | Political riots were higher in warm countries compared to hot and cold countries.                                                                                |

|                                                   |                                                                |           |            |          |          |                                                          |                                    |                                                                                                                                                       |
|---------------------------------------------------|----------------------------------------------------------------|-----------|------------|----------|----------|----------------------------------------------------------|------------------------------------|-------------------------------------------------------------------------------------------------------------------------------------------------------|
| van Weezel 2020 <sup>74</sup>                     | Africa                                                         | 2003-2017 | all season | annually | modeled  | Armed conflict                                           | Bayesian Model Averaging (BMA)     | Temperature was correlated to armed conflict risk.                                                                                                    |
| Wei, Shao et al. 2022 <sup>75</sup>               | 171 countries                                                  | 2000-2018 | all season | annually | modeled  | Homicide                                                 | Ordinary linear squares model      | Effect estimates of 0.130 (se: 0.061) for homicide.                                                                                                   |
| Wesselbaum 2022 <sup>76</sup>                     | New York, USA                                                  | 2006-2020 | all season | daily    | monitors | Violent crime, homicide, and murder                      | Negative binomial regression model | Effect estimates of -0.0066 (se: 0.0035) for violent crime, 0 (se: 0.0002) for homicide, and 0 (se: 0.0002) for murder.                               |
| Williams, McDonogh-Wong et al. 2020 <sup>77</sup> | 23 cities, USA                                                 | 2000-2019 | all season | daily    | monitors | Police fire calls                                        | Generalized additive model         | There was an increase in fire and police calls as daily maximum temperature increased.                                                                |
| Williams, Allen et al. 2020 <sup>78</sup>         | Boston, Massachusetts, USA                                     | 2010-2014 | all season | daily    | modeled  | Dispatch calls                                           | Poisson regression model           | Increased heat index has increased the risk of police dispatch calls.                                                                                 |
| Williams, Hill et al. 2015 <sup>79</sup>          | 5 police districts and 66 territorial districts in New Zealand | 1993-2009 | all season | daily    | modeled  | Assault resulting in hospitalization                     | Generalized linear mixed models    | The correlation between mean temperature and the rate of assaults causing hospitalization by district was positive, $r = 0.41$ (95 % CI: 0.18, 0.59). |
| Wu, Lee et al. 2020 <sup>80</sup>                 | Virginia, USA                                                  | 1973-2009 | all season | monthly  | monitors | Violent crime, assault, murder, robbery, property crime, | Multiple regression model          | Effect estimates of 1.146 (T value: 4.951) for violent crime and 16.235 (T                                                                            |

|                                                  |                           |           |            |          |          |                                         |                                                 |                                                                                                                        |
|--------------------------------------------------|---------------------------|-----------|------------|----------|----------|-----------------------------------------|-------------------------------------------------|------------------------------------------------------------------------------------------------------------------------|
|                                                  |                           |           |            |          |          | motor vehicle theft, burglary, and rape |                                                 | value: 7.321) for property crime.                                                                                      |
| Xu, Xiong et al. 2020 <sup>81</sup>              | 9 cities, USA             | 2007-2017 | all season | daily    | modeled  | Homicide                                | Conditional logistic regression model           | Odds ratio for every 5°C increase in temperature for intentional homicide is 1.095 (95% CI: 1.043, 1.150) for Chicago. |
| Yiannakoulias and Kielasinska 2016 <sup>82</sup> | Toronto, Canada           | 1996-2007 | all season | daily    | monitors | Arson                                   | Poisson regression model                        | Effect estimates of 0.168 (se: 0.02) for arson.                                                                        |
| Yu, Mu et al. 2017 <sup>83</sup>                 | Taiwan                    | 2006-2015 | all season | daily    | monitors | Violent crime and property crime        | Negative binomial regression model              | Effect estimates of 0.0019 (se: 0.0012) for all property and 0.0184 (se: 0.0033) for all violent crime.                |
| Zhu, He et al. 2023 <sup>84</sup>                | India, Nepa, and Pakistan | 2000-2018 | all season | annually | modeled  | Intimate Partner Violence (IPV)         | Multivariable mixed-effects logistic regression | Percent change is 4.49 (95% CI: 4.2, 4.78) for IPV.                                                                    |

**Table S4.** Summary of the association of the included studies for systematic literature review of the association between temperature, crime and violence

| Crime/Violence Type             | Number of Studies <sup>a</sup> | Summary of association <sup>b</sup> |               |               |               | Temperature Metrics <sup>c</sup>     |
|---------------------------------|--------------------------------|-------------------------------------|---------------|---------------|---------------|--------------------------------------|
|                                 |                                | Positive                            |               | Negative      |               |                                      |
|                                 |                                | p-value <0.05                       | p-value ≥0.05 | p-value <0.05 | p-value ≥0.05 |                                      |
| Total Crime <sup>d</sup>        | 8                              | 9                                   | 5             | 0             | 0             | 5 mean, 3 max, 1 min, and 2 others   |
| Violent Crime                   |                                |                                     |               |               |               |                                      |
| General <sup>e</sup>            | 22                             | 10                                  | 1             | 1             | 0             | 9 mean, 7 max, 2 min, and 6 others   |
| Assault                         | 29                             | 24                                  | 3             | 1             | 2             | 22 mean, 6 max, 1 min, and 2 others  |
| Homicide                        | 20                             | 12                                  | 6             | 0             | 5             | 17 mean, 2 max, and 1 other          |
| Robbery                         | 20                             | 9                                   | 1             | 2             | 1             | 14 mean, 4 max, and 2 other          |
| Murder                          | 5                              | 6                                   | 1             | 0             | 0             | 4 mean and 2 max                     |
| Firearm violence                | 5                              | 3                                   | 0             | 0             | 0             | 5 max                                |
| Property Crime                  |                                |                                     |               |               |               |                                      |
| General <sup>e</sup>            | 16                             | 7                                   | 3             | 2             | 0             | 10 mean, 4 max, 2 min, and 4 others  |
| Burglary                        | 14                             | 6                                   | 0             | 0             | 2             | 11 mean and 3 max                    |
| Motor Vehicle Theft             | 10                             | 7                                   | 0             | 1             | 2             | 8 mean, 3 max, and 2 other           |
| Theft                           | 8                              | 5                                   | 1             | 0             | 1             | 7 mean and 2 max                     |
| Larceny                         | 5                              | 3                                   | 1             | 0             | 1             | 3 mean and 2 max                     |
| Arson                           | 3                              | 1                                   | 0             | 0             | 1             | 3 mean                               |
| Sexual Crime <sup>f</sup>       |                                |                                     |               |               |               |                                      |
| General <sup>e</sup>            | 3                              | 2                                   | 1             | 0             | 1             | 3 mean, 1 max, and 1 other           |
| Rape                            | 8                              | 6                                   | 1             | 0             | 0             | 9 mean and 2 max                     |
| Intimate Partner Violence (IPV) | 3                              | 3                                   | 1             | 0             | 0             | 1 mean, 2 max, and 1 other           |
| Others <sup>g</sup>             | 39                             | 19                                  | 5             | 1             | 2             | 15 mean, 15 max, 1 min, and 7 others |

Note: <sup>a</sup> One study may appear in multiple rows for different types of crime/violence as some studies examined multiple crime/violence; <sup>b</sup> Summary of the association as Positive/Negative indicating the statistically significant results for the positive/negative association for temperature and crime/violence based on the p-value, study results without statistical significance were not counted, and studies with multiple results were counted more than once accordingly. Therefore, the row sum of the results does not add up to the total number of studies; <sup>c</sup> Some studies have examined mean temperature, maximum temperature, or others, including heat index or temperature shock; <sup>d</sup> Total crime focused on studies categorizing the outcome as total crime (aggregating different crime/violence as total crime); <sup>e</sup> "General" refers to a grouping of violence/property/sexual crime for which types of crime were categorized differently by study; <sup>f</sup> Sexual crime can be violent but is examined here as a separate category from other types of violent crime; <sup>g</sup> Others including civil war, angry tweets, political violence, assault mortality, urban crime, and breaks.

**Table S5.** The summary of association of the included studies for systematic literature review of the association between temperature, crime and violence by geographical locations

|                    | Number of Studies <sup>a</sup> | Summary of association <sup>b</sup> |               |               |               |
|--------------------|--------------------------------|-------------------------------------|---------------|---------------|---------------|
|                    |                                | Positive                            |               | Negative      |               |
|                    |                                | p-value <0.05                       | p-value ≥0.05 | p-value <0.05 | p-value ≥0.05 |
| Total              | 83                             | 132                                 | 30            | 8             | 18            |
| Africa             | 10                             | 14                                  | 4             | 0             | 2             |
| Asia               | 15                             | 40                                  | 6             | 0             | 3             |
| Europe             | 7                              | 4                                   | 1             | 0             | 0             |
| North America      | 39                             | 59                                  | 16            | 5             | 12            |
| Oceania            | 7                              | 11                                  | 0             | 1             | 0             |
| South America      | 1                              | 1                                   | 0             | 0             | 1             |
| Other <sup>c</sup> | 4                              | 3                                   | 3             | 2             | 0             |

*Note: <sup>a</sup> One study may appear in multiple rows for different types of crime/violence as some studies examined multiple crime/violence; <sup>b</sup> Summary of the association as Positive/Negative indicating the statistically significant results for the positive/negative association for temperature and crime/violence based on the p-value, study results without statistical significance were not counted, and studies with multiple results were counted more than once accordingly. Therefore, the row sum of the results does not add up to the total number of studies; <sup>c</sup> other study continents where there are multiple countries analyzed for the study*



**Table S6.** Heat map for risk of bias rating and quality rating for the included studies for systematic literature review of the association between temperature, crime and violence

| Study                                           | Risk of Bias        |                    |                  |                |                          |                          |                      |                      |
|-------------------------------------------------|---------------------|--------------------|------------------|----------------|--------------------------|--------------------------|----------------------|----------------------|
|                                                 | Key Criteria        |                    |                  | Other Criteria |                          |                          |                      |                      |
|                                                 | Exposure assessment | Outcome assessment | Confounding bias | Selection bias | Attrition/exclusion bias | Selective reporting bias | Conflict of interest | Other source of bias |
| Algahtany, Kumar et al. 2022 <sup>2</sup>       | 3                   | 2                  | 3                | 2              | 2                        | 1                        | 1                    | 2                    |
| Annan-Phan and Ba 2023 <sup>3</sup>             | 2                   | 2                  | 3                | 1              | 2                        | 2                        | 3                    | 3                    |
| Auliciems and DiBartolo 1995 <sup>4</sup>       | 2                   | 2                  | 3                | 2              | 1                        | 1                        | 3                    | 3                    |
| Baryshnikova, Davidson et al. 2022 <sup>5</sup> | 1                   | 2                  | 1                | 1              | 1                        | 1                        | 3                    | 1                    |
| Berman, Bayham et al. 2020 <sup>6</sup>         | 1                   | 2                  | 1                | 1              | 1                        | 1                        | 1                    | 1                    |
| Bollfrass and Shaver 2015 <sup>7</sup>          | 4                   | 4                  | 3                | 3              | 3                        | 2                        | 3                    | 2                    |
| Butke and Sheridan 2010 <sup>8</sup>            | 1                   | 1                  | 1                | 2              | 1                        | 1                        | 3                    | 3                    |
| Castle and Kovacs <sup>9</sup>                  | 2                   | 2                  | 1                | 2              | 1                        | 1                        | 3                    | 2                    |
| Chambru 2020 <sup>10</sup>                      | 4                   | 4                  | 2                | 3              | 1                        | 1                        | 1                    | 2                    |
| Churchill, Smyth, and Trinh 2023 <sup>11</sup>  | 3                   | 3                  | 2                | 2              | 2                        | 1                        | 1                    | 2                    |
| Cohn and Rotton 2000 <sup>12</sup>              | 2                   | 2                  | 2                | 2              | 1                        | 1                        | 3                    | 2                    |
| Corcoran and Zahnnow 2021 <sup>13</sup>         | 2                   | 2                  | 2                | 1              | 1                        | 1                        | 1                    | 2                    |
| Cruz, D'Alessio et al, 2023 <sup>14</sup>       | 1                   | 2                  | 3                | 1              | 1                        | 1                        | 1                    | 3                    |
| DeFronzo 1984 <sup>15</sup>                     | 3                   | 3                  | 2                | 3              | 3                        | 2                        | 3                    | 2                    |
| FIELD 1992 <sup>16</sup>                        | 3                   | 3                  | 3                | 2              | 2                        | 2                        | 3                    | 2                    |
| Gamble and Hess 2012 <sup>17</sup>              | 2                   | 2                  | 2                | 2              | 2                        | 1                        | 1                    | 2                    |

|                                                |   |   |   |   |   |   |   |   |
|------------------------------------------------|---|---|---|---|---|---|---|---|
| Gates, Klein et al. 2019 <sup>18</sup>         | 1 | 2 | 1 | 2 | 1 | 1 | 2 | 1 |
| Heilmann, Kahn et al. 2021 <sup>19</sup>       | 2 | 2 | 1 | 2 | 2 | 1 | 3 | 1 |
| Hodgkinson, Corcoran et al. 2023 <sup>20</sup> | 2 | 2 | 2 | 2 | 2 | 1 | 1 | 2 |
| Hou, Zhang et al. 2023 <sup>21</sup>           | 1 | 1 | 1 | 1 | 1 | 2 | 2 | 1 |
| Hu, Wu et al. 2017 <sup>22</sup>               | 3 | 3 | 4 | 2 | 2 | 2 | 2 | 2 |
| Jung, Kim et al. 2020 <sup>23</sup>            | 3 | 3 | 1 | 1 | 2 | 2 | 1 | 2 |
| Jung, Chun et al. 2020 <sup>24</sup>           | 3 | 3 | 1 | 2 | 2 | 2 | 3 | 2 |
| Kim, Kim et al 2023 <sup>25</sup>              | 2 | 2 | 1 | 1 | 2 | 2 | 2 | 2 |
| Le, Berman et al. 2022 <sup>26</sup>           | 2 | 1 | 1 | 2 | 2 | 2 | 2 | 1 |
| Lemon and Partridge 2017 <sup>27</sup>         | 2 | 3 | 2 | 1 | 2 | 2 | 1 | 2 |
| Li, Feng et al. 2023 <sup>28</sup>             | 4 | 4 | 2 | 1 | 2 | 2 | 2 | 2 |
| Linning, Andresen et al. 2017 <sup>29</sup>    | 3 | 2 | 2 | 1 | 2 | 1 | 2 | 2 |
| Linning, Andresen et al. 2017b <sup>30</sup>   | 3 | 3 | 2 | 2 | 2 | 2 | 3 | 2 |
| Lynch, Stretesky et al. 2020 <sup>31</sup>     | 3 | 3 | 3 | 1 | 2 | 2 | 1 | 3 |
| Lynch, Stretesky et al. 2022 <sup>32</sup>     | 3 | 3 | 4 | 2 | 3 | 2 | 1 | 4 |
| Lyons, Gause et al. 2022 <sup>33</sup>         | 2 | 1 | 1 | 2 | 2 | 2 | 3 | 1 |
| Mapou, Shendell et al. 2017 <sup>34</sup>      | 2 | 2 | 2 | 2 | 1 | 2 | 3 | 2 |
| Mares 2013 <sup>35</sup>                       | 3 | 3 | 2 | 2 | 2 | 2 | 3 | 2 |
| Mares 2013b <sup>36</sup>                      | 3 | 3 | 2 | 2 | 2 | 2 | 3 | 2 |
| Mares and Moffett 2016 <sup>37</sup>           | 2 | 2 | 3 | 2 | 2 | 1 | 1 | 1 |
| Mares and Moffett 2019 <sup>38</sup>           | 2 | 2 | 3 | 2 | 1 | 2 | 3 | 2 |
| Maystadt, Calderone et al. 2014 <sup>39</sup>  | 2 | 2 | 2 | 1 | 2 | 2 | 2 | 1 |
| McLean 2007 <sup>40</sup>                      | 2 | 2 | 3 | 2 | 2 | 2 | 3 | 3 |

|                                                     |   |   |   |   |   |   |   |   |
|-----------------------------------------------------|---|---|---|---|---|---|---|---|
| Michel, Wang et al. 2016 <sup>41</sup>              | 2 | 2 | 2 | 2 | 2 | 2 | 1 | 2 |
| Muzafar Shah 2017 <sup>42</sup>                     | 3 | 3 | 3 | 2 | 2 | 2 | 2 | 3 |
| O'Loughlin, Linke et al. 2014 <sup>43</sup>         | 2 | 3 | 3 | 1 | 1 | 2 | 2 | 2 |
| O'Loughlin, Witmer et al. 2012 <sup>44</sup>        | 3 | 3 | 2 | 1 | 1 | 2 | 2 | 1 |
| Otrachshenko, Popova et al. 2021 <sup>45</sup>      | 2 | 3 | 2 | 2 | 2 | 2 | 3 | 1 |
| Pacillo, Kangogo et al. 2022 <sup>46</sup>          | 3 | 3 | 4 | 2 | 2 | 2 | 2 | 3 |
| Peng, Xueming et al. 2011 <sup>47</sup>             | 2 | 1 | 2 | 1 | 1 | 3 | 1 | 2 |
| Peng and Zhan 2022 <sup>48</sup>                    | 2 | 4 | 3 | 2 | 1 | 2 | 2 | 1 |
| Potgieter, Fabris-Rotelli et al. 2022 <sup>49</sup> | 2 | 2 | 2 | 2 | 2 | 2 | 1 | 1 |
| Rahman, Lorenzo et al. 2023 <sup>50</sup>           | 1 | 1 | 2 | 2 | 2 | 1 | 2 | 1 |
| Ranson 2014 <sup>51</sup>                           | 1 | 2 | 2 | 1 | 1 | 1 | 3 | 1 |
| Reeping and Hemenway 2020 <sup>52</sup>             | 3 | 3 | 3 | 2 | 2 | 1 | 1 | 2 |
| Rotton and Cohn 2000 <sup>53</sup>                  | 2 | 2 | 1 | 1 | 1 | 1 | 3 | 2 |
| Rotton and Cohn 2000b <sup>54</sup>                 | 2 | 2 | 1 | 1 | 1 | 1 | 3 | 2 |
| Ruderman and Cohn 2021 <sup>55</sup>                | 2 | 2 | 1 | 1 | 2 | 1 | 1 | 2 |
| Sanz-Barbero, Linares et al. 2018 <sup>56</sup>     | 2 | 2 | 2 | 3 | 2 | 1 | 1 | 2 |
| Schinasi and Hamra 2017 <sup>57</sup>               | 2 | 2 | 1 | 2 | 2 | 2 | 2 | 1 |
| Schutte and Breetzke 2018 <sup>58</sup>             | 2 | 2 | 3 | 3 | 2 | 1 | 1 | 3 |
| Schutte, Breetzke et al. 2021 <sup>59</sup>         | 2 | 2 | 3 | 2 | 2 | 2 | 3 | 2 |
| Shen, Hu et al. 2020 <sup>60</sup>                  | 3 | 2 | 3 | 1 | 2 | 2 | 2 | 3 |
| Sommer, Lee et al. 2018 <sup>61</sup>               | 2 | 2 | 2 | 2 | 2 | 3 | 2 | 2 |
| Sorg and Taylor 2011 <sup>62</sup>                  | 3 | 3 | 2 | 2 | 2 | 1 | 3 | 2 |

|                                                   |   |   |   |   |   |   |   |   |
|---------------------------------------------------|---|---|---|---|---|---|---|---|
| Stechemesser, Levermann et al. 2022 <sup>63</sup> | 2 | 2 | 2 | 3 | 2 | 1 | 2 | 2 |
| Stevens, Beggs et al. 2019 <sup>64</sup>          | 2 | 2 | 2 | 1 | 2 | 1 | 3 | 2 |
| Stevens, Graham et al. 2021 <sup>65</sup>         | 2 | 2 | 2 | 3 | 2 | 3 | 1 | 2 |
| Stevens, Graham et al. 2023 <sup>66</sup>         | 2 | 2 | 3 | 2 | 2 | 2 | 1 | 2 |
| Takahashi 2017 <sup>67</sup>                      | 2 | 3 | 2 | 1 | 2 | 2 | 1 | 2 |
| Talaei, Hedjazi et al. 2014 <sup>68</sup>         | 2 | 2 | 3 | 2 | 2 | 2 | 3 | 3 |
| Tiihonen, Halonen et al. 2017 <sup>69</sup>       | 3 | 2 | 3 | 1 | 2 | 1 | 1 | 2 |
| Tol and Wagner 2010 <sup>70</sup>                 | 3 | 3 | 2 | 1 | 2 | 1 | 3 | 2 |
| Towers, Chen et al. 2018 <sup>71</sup>            | 2 | 2 | 2 | 2 | 2 | 2 | 3 | 2 |
| Trujillo and Howley 2021 <sup>72</sup>            | 2 | 2 | 2 | 1 | 1 | 1 | 2 | 1 |
| van de Vliert, Schwartz et al. 1999 <sup>73</sup> | 3 | 3 | 3 | 3 | 2 | 2 | 2 | 3 |
| van Weezel 2020 <sup>74</sup>                     | 2 | 3 | 3 | 2 | 2 | 2 | 1 | 2 |
| Wei, Shao et al. 2022 <sup>75</sup>               | 3 | 3 | 2 | 2 | 2 | 1 | 2 | 1 |
| Wesselbaum 2022 <sup>76</sup>                     | 2 | 2 | 2 | 1 | 2 | 2 | 1 | 2 |
| Williams, McDonogh-Wong et al. 2020 <sup>77</sup> | 2 | 2 | 2 | 2 | 2 | 2 | 1 | 2 |
| Williams, Allen et al. 2020 <sup>78</sup>         | 2 | 2 | 2 | 2 | 3 | 2 | 1 | 2 |
| Williams, Hill et al. 2015 <sup>79</sup>          | 1 | 1 | 2 | 1 | 2 | 2 | 3 | 1 |
| Wu, Lee et al. 2020 <sup>80</sup>                 | 2 | 2 | 4 | 1 | 2 | 2 | 1 | 3 |
| Xu, Xiong et al. 2020 <sup>81</sup>               | 1 | 1 | 1 | 2 | 2 | 2 | 1 | 1 |
| Yiannakoulias and Kielasinska 2016 <sup>82</sup>  | 2 | 2 | 2 | 2 | 2 | 1 | 1 | 2 |
| Yu, Mu et al. 2017 <sup>83</sup>                  | 2 | 2 | 2 | 2 | 2 | 2 | 3 | 1 |
| Zhu, He et al. 2023 <sup>84</sup>                 | 2 | 3 | 2 | 3 | 2 | 1 | 2 | 1 |

*Note: Green indicating low risk of bias (score 1), olive green indicating probably low risk of bias (score 2); yellow indicating probably high risk of bias (score 3); red indicating high risk of bias (score 4)*

**Table S7.** Details of risk of bias assessment for included studies for systematic literature review of the association between temperature, crime and violence.

| Study                                     | Risk of Bias ratings, reason                                                                                                                                                                          |                                                                                                                                                                                                                                           |                                                                                                                                                                                |                                                                                                                            |                                                                                                                                                        |                                                                                                                             |                                                                              |                                                                                                                                                             |
|-------------------------------------------|-------------------------------------------------------------------------------------------------------------------------------------------------------------------------------------------------------|-------------------------------------------------------------------------------------------------------------------------------------------------------------------------------------------------------------------------------------------|--------------------------------------------------------------------------------------------------------------------------------------------------------------------------------|----------------------------------------------------------------------------------------------------------------------------|--------------------------------------------------------------------------------------------------------------------------------------------------------|-----------------------------------------------------------------------------------------------------------------------------|------------------------------------------------------------------------------|-------------------------------------------------------------------------------------------------------------------------------------------------------------|
|                                           | Key Criteria                                                                                                                                                                                          |                                                                                                                                                                                                                                           |                                                                                                                                                                                | Other Criteria                                                                                                             |                                                                                                                                                        |                                                                                                                             |                                                                              |                                                                                                                                                             |
|                                           | Exposure assessment                                                                                                                                                                                   | Outcome assessment                                                                                                                                                                                                                        | Confounding bias                                                                                                                                                               | Selection bias                                                                                                             | Attrition/exclusion bias                                                                                                                               | Selective reporting bias                                                                                                    | Conflict of interest                                                         | Other source of bias                                                                                                                                        |
| Algahtany, Kumar et al. 2022 <sup>2</sup> | Probably high<br><br>The study used monthly temperature data for measuring exposure, which might attenuate the true temperature effect. Also, no quality control of the temperature data is reported. | Probably low<br><br>Outcome data are based on Ministry of Justice, which it is routine and long-term and, thus, likely to be more reliable than other data collection systems. However, it is based on monthly average counts.            | Probably high<br><br>The study did not control for all primary confounders (time trend and seasonality). However, they considered different factors (humidity and haze).       | Probably low<br><br>They have included two different cities; this might suggest the indirect evidence of low risk of bias. | Probably low<br><br>No sufficient information to evaluate the completeness of the outcome data, but the large sample size suggests potential low risk. | Low<br><br>Focused on assault, alcohol, drug, theft, homicide, and sexual assault. All the relevant findings were reported. | Low<br><br>Declared no competing financial interests.                        | Probably low<br><br>Multiple regression was conducted. However, no tests or sensitivity analysis for checking the appropriateness of the model is reported. |
| Annan-Phan and Ba 2023 <sup>3</sup>       | Probably low<br><br>The study used daily temperature data from European Centre for Medium-Range Weather Forecasts. Also, the exposure dataset was population weighted.                                | Probably low<br><br>Outcome data are based on FBI's Uniform Crime Reporting Data System (UCR), which it is routine and long-term and, thus, likely to be more reliable than other data collection systems. However, the outcome was based | Probably high<br><br>The study did not control for all primary confounders (time trend and seasonality). However, they considered different factors (fixed effects and space). | Low<br><br>All of the reported crimes from USA were included in the study.                                                 | Probably low<br><br>No sufficient information to evaluate the completeness of the outcome data, but the large sample size suggests potential low risk. | Probably low<br><br>Focused on civilian deaths and threats.                                                                 | Probably high<br><br>No declaration of potential conflict of interest found. | Probably high<br><br>Poisson regression model was used. Sensitivity analysis like linearity check was not conducted.                                        |

|                                                 |                                                                                                                                                                                                                                                     |                                                                                                                                                                                                                                                         |                                                                                                                                                                                                     |                                                                                                            |                                                          |                                                                               |                                                                              |                                                                                                                                                                                            |
|-------------------------------------------------|-----------------------------------------------------------------------------------------------------------------------------------------------------------------------------------------------------------------------------------------------------|---------------------------------------------------------------------------------------------------------------------------------------------------------------------------------------------------------------------------------------------------------|-----------------------------------------------------------------------------------------------------------------------------------------------------------------------------------------------------|------------------------------------------------------------------------------------------------------------|----------------------------------------------------------|-------------------------------------------------------------------------------|------------------------------------------------------------------------------|--------------------------------------------------------------------------------------------------------------------------------------------------------------------------------------------|
|                                                 |                                                                                                                                                                                                                                                     | on monthly value estimates.                                                                                                                                                                                                                             |                                                                                                                                                                                                     |                                                                                                            |                                                          |                                                                               |                                                                              |                                                                                                                                                                                            |
| Auliciems and DiBartolo 1995 <sup>4</sup>       | Probably low<br><br>Daily maximum temperature data were obtained from the Bureau of Meteorology (BOM).                                                                                                                                              | Probably low<br><br>Outcome data are based on daily number of police calls; however, the study does not provide quality assurance of the outcome data.                                                                                                  | Probably high<br><br>The main analysis of the study was correlation analysis, and the humidity and rain were adjusted for the multiple regression.                                                  | Probably low<br><br>Included all the police calls, but not all the incidents might have been captured.     | Low<br><br>No outcome data was excluded inappropriately. | Low<br><br>Focused on the number of calls, which was all reported.            | Probably high<br><br>No declaration of potential conflict of interest found  | Probably high<br><br>Multiple regression model using weekly calls might not be adequate. Also, no tests or sensitivity analysis for checking the appropriateness of the model is reported. |
| Baryshnikova, Davidson et al. 2022 <sup>5</sup> | Low<br><br>Hourly mean temperature data were obtained from the National Oceanic and Atmospheric Administration's National Centers for Environmental Information land-based stations. Also, explored the data have been explored for missing values. | Probably low<br><br>Outcome data are based on police department, which it is routine and long-term and, thus, likely to be more reliable than other data collection systems. However, the study does not provide quality assurance of the outcome data. | Low<br><br>The study controlled for all primary confounders (time trend and seasonality) and considered different confounders (Wind direction, holidays, hour and day of full moon, and marathons). | Low<br><br>The hourly crime/violence counts that are presented on Figure 1 show a reasonable distribution. | Low<br><br>No outcome data was excluded inappropriately. | Low<br><br>Focused on the violent and property crime, which was all reported. | Probably high<br><br>No declaration of potential conflict of interest found. | Low<br><br>A linear regression model was conducted. Different sensitivity analyses of the model were performed, which provide direct evidence that the used method was appropriate.        |

|                                         |                                                                                                                                                                                         |                                                                                                                                                                                                                                                                                                                               |                                                                                                                                                                                                                           |                                                                                                                |                                                                                                                                              |                                                                                                                                 |                                                                             |                                                                                                                                                                                          |
|-----------------------------------------|-----------------------------------------------------------------------------------------------------------------------------------------------------------------------------------------|-------------------------------------------------------------------------------------------------------------------------------------------------------------------------------------------------------------------------------------------------------------------------------------------------------------------------------|---------------------------------------------------------------------------------------------------------------------------------------------------------------------------------------------------------------------------|----------------------------------------------------------------------------------------------------------------|----------------------------------------------------------------------------------------------------------------------------------------------|---------------------------------------------------------------------------------------------------------------------------------|-----------------------------------------------------------------------------|------------------------------------------------------------------------------------------------------------------------------------------------------------------------------------------|
| Berman, Bayham et al. 2020 <sup>6</sup> | Low<br><br>Daily mean temperature data were obtained from the gridMET spatiotemporal reanalysis weather data model. Also, explored the correlation with the monitoring station dataset. | Probably low<br><br>Outcome data are based on Federal Bureau of Investigation (FBI) National Incidence Based Reporting System (NIBRS), which it is routine and long-term and, thus, likely to be more reliable than other data collection systems. However, the study does not provide quality assurance of the outcome data. | Low<br><br>The study controlled for all primary confounders (time trend and seasonality) and considered different confounders (Day of week, holiday, and long-term temporal trends (population shifts, seasonal trends)). | Low<br><br>The daily crime/violence counts that are presented on Figure 1 show a reasonable distribution.      | Low<br><br>No outcome data was excluded inappropriately.                                                                                     | Low<br><br>Focused on the violent and property crime, which was all reported.                                                   | Low<br><br>Declared no competing financial interests.                       | Low<br><br>A two-stage hierarchical model was conducted. Different sensitivity analyses of the model were performed, which provide direct evidence that the used method was appropriate. |
| Bollfrass and Shaver 2015 <sup>7</sup>  | High<br><br>The study used georeferenced temperature data for measuring exposure. Also, no quality control or the resource of the temperature data is reported.                         | High<br><br>The study used georeferenced conflict data. Also, no quality control or the resource of the outcome data is reported.                                                                                                                                                                                             | Probably high<br><br>The study did not control for all primary confounders but controlled for other confounders.                                                                                                          | Probably high<br><br>Included the civil wars for sub-Saharan Africa and the study omitted some conflict years. | Probably high<br><br>The civil war incidence dataset is not under quality control, which could result in high percentage of missing dataset. | Probably low<br><br>All the outcomes that the study pre-specified in the abstract and methods sections are explicitly reported. | Probably high<br><br>No declaration of potential conflict of interest found | Probably low<br><br>Various regression model was used. However, no sensitivity analysis was done.                                                                                        |
| Butke and Sheridan 2010 <sup>8</sup>    | Low<br><br>3-hour mean temperature data were obtained from the National                                                                                                                 | Low<br><br>Outcome data are based on Case Western Reserve University's Center                                                                                                                                                                                                                                                 | Low<br><br>The study controlled for all primary confounders                                                                                                                                                               | Probably low<br><br>Included all the crime from Cleveland.                                                     | Low<br><br>The coverage for crime and temperature                                                                                            | Low<br><br>Focused on the various crimes,                                                                                       | Probably high<br><br>No declaration                                         | Probably high<br><br>Spatial regression model was used.                                                                                                                                  |



|                                |                                                                                                                                                                    |                                                                                                                                                                                             |                                                                                                                                |                                                                                                |                                                          |                                                                                       |                                                                              |                                                                                                                               |
|--------------------------------|--------------------------------------------------------------------------------------------------------------------------------------------------------------------|---------------------------------------------------------------------------------------------------------------------------------------------------------------------------------------------|--------------------------------------------------------------------------------------------------------------------------------|------------------------------------------------------------------------------------------------|----------------------------------------------------------|---------------------------------------------------------------------------------------|------------------------------------------------------------------------------|-------------------------------------------------------------------------------------------------------------------------------|
|                                | Climatic Data Center (NCDC) for Cleveland Hopkins International Airport. Also, explored the data have been explored for missing values.                            | on Urban Poverty and Social Change. The study does provide quality assurance of the outcome data.                                                                                           | (time trend and seasonality) and considered different confounders.                                                             |                                                                                                | dataset was over 99%, showing a high completeness.       | which was all reported.                                                               | of potential conflict of interest found.                                     | Regression analysis and sensitivity analysis like linearity check was not conducted.                                          |
| Castle and Kovacs <sup>9</sup> | Probably low<br><br>Daily temperature data were obtained from the monitoring stations. However, the study does not provide quality assurance of the exposure data. | Probably low<br><br>Outcome data are based on police service in North Bay. However, the study does not provide quality assurance of the outcome data.                                       | Low<br><br>The study controlled for all primary confounders (time trend and seasonality) and considered different confounders. | Probably low<br><br>Included all the crime from North Bay, which is a small city.              | Low<br><br>No outcome data was excluded inappropriately. | Low<br><br>Focused on the all the police calls, which was all reported.               | Probably high<br><br>No declaration of potential conflict of interest found. | Probably low<br><br>Negative binomial regression model was used. Sensitivity analysis like linearity check was not conducted. |
| Chambru 2020 <sup>10</sup>     | High<br><br>The study used seasonal average temperature at the province level, which might attenuate the true temperature effect. Also, no quality control of the  | High<br><br>Outcome data are based on the annual ratio of offenders in all criminal procedures per 100,000 inhabitants from the Savoyard judicial archives. Also, no quality control of the | Probably low<br><br>The study controlled for some primary confounders (time trend) and considered different confounders.       | Probably high<br><br>The people resided in Savoy, which does not exist currently, is included. | Low<br><br>No outcome data was excluded inappropriately. | Low<br><br>Focused on the total, violent, and property crime, which was all reported. | Low<br><br>Declared no competing financial interests.                        | Probably low<br><br>Multiple regression model was used. Sensitivity analysis like linearity check was not conducted.          |

|                                                |                                                                                                                                                                                                                                                              |                                                                                                                                                                |                                                                                                                          |                                                                                        |                                                                                                                                                        |                                                                                       |                                                                              |                                                                                                                              |
|------------------------------------------------|--------------------------------------------------------------------------------------------------------------------------------------------------------------------------------------------------------------------------------------------------------------|----------------------------------------------------------------------------------------------------------------------------------------------------------------|--------------------------------------------------------------------------------------------------------------------------|----------------------------------------------------------------------------------------|--------------------------------------------------------------------------------------------------------------------------------------------------------|---------------------------------------------------------------------------------------|------------------------------------------------------------------------------|------------------------------------------------------------------------------------------------------------------------------|
|                                                | temperature data is reported.                                                                                                                                                                                                                                | outcome data is reported.                                                                                                                                      |                                                                                                                          |                                                                                        |                                                                                                                                                        |                                                                                       |                                                                              |                                                                                                                              |
| Churchill, Smyth, and Trinh 2023 <sup>11</sup> | Probably high<br><br>The study used temperature data from European Centre for Medium-Range Weather Forecasts (ECMWF), using a monthly value which might attenuate the true temperature effect. Also, no quality control of the temperature data is reported. | Probably high<br><br>Outcome data are based on the monthly rates from the government agency. However, no quality control of the outcome data is reported.      | Probably low<br><br>The study controlled for some primary confounders (time trend) and considered different confounders. | Probably low<br><br>Included all the crime from Victoria, New South Wales, Queensland. | Probably low<br><br>No sufficient information to evaluate the completeness of the outcome data, but the large sample size suggests potential low risk. | Low<br><br>Focused on the total, violent, and property crime, which was all reported. | Low<br><br>Declared no competing financial interests.                        | Probably low<br><br>Multiple regression model was used. Sensitivity analysis like linearity check was not conducted.         |
| Cohn and Rotton 2000 <sup>12</sup>             | Probably low<br><br>3-hour interval temperature data were obtained from the National Weather Service (NWS). However, the study does not provide quality assurance of the exposure data.                                                                      | Probably low<br><br>Outcome data are based on Police Department of Minneapolis, MN. However, the study does not provide quality assurance of the outcome data. | Probably low<br><br>The study controlled for some primary confounders (time trend) and considered different confounders. | Probably low<br><br>Included all the police calls from Minneapolis.                    | Low<br><br>The coverage for crime and temperature dataset was over 97%, showing a high completeness.                                                   | Low<br><br>Focused on burglary, robbery, and theft, which was all reported.           | Probably high<br><br>No declaration of potential conflict of interest found. | Probably low<br><br>Hierarchical regression analyses were used. Sensitivity analysis like linearity check was not conducted. |
| Corcoran and Zahnow 2021 <sup>13</sup>         | Probably low                                                                                                                                                                                                                                                 | Probably low                                                                                                                                                   | Probably low                                                                                                             | Low                                                                                    | Low                                                                                                                                                    | Low                                                                                   | Low                                                                          | Probably low                                                                                                                 |

|                                           |                                                                                                                                                                                                                                                                           |                                                                                                                                                                                                                                                                                                                               |                                                                                                          |                                                                                                                                                                                                                                                  |                                                          |                                                             |                                                       |                                                                                                                               |
|-------------------------------------------|---------------------------------------------------------------------------------------------------------------------------------------------------------------------------------------------------------------------------------------------------------------------------|-------------------------------------------------------------------------------------------------------------------------------------------------------------------------------------------------------------------------------------------------------------------------------------------------------------------------------|----------------------------------------------------------------------------------------------------------|--------------------------------------------------------------------------------------------------------------------------------------------------------------------------------------------------------------------------------------------------|----------------------------------------------------------|-------------------------------------------------------------|-------------------------------------------------------|-------------------------------------------------------------------------------------------------------------------------------|
|                                           | Daily temperature data were obtained from the Australian Bureau of Meteorology. However, the study does not provide quality assurance of the exposure data.                                                                                                               | Outcome data are based on daily Queensland Police Service crime data. However, the study does not provide quality assurance of the outcome data.                                                                                                                                                                              | The study controlled for some primary confounders (season) and considered different confounders.         | The daily assault and temperature that are presented on Figure 2 show a reasonable distribution.                                                                                                                                                 | No outcome data was excluded inappropriately.            | Focused on assault which was all reported.                  | Declared no competing financial interests.            | Negative binomial multilevel regression model was used. Sensitivity analysis like linearity check was not conducted.          |
| Cruz, D'Alessio et al, 2023 <sup>14</sup> | Low<br><br>Daily maximum temperature data were obtained from the Weather Underground, a commercial weather company that provides real-time and archived weather statistics across the United States. Also, the study does provide quality assurance of the exposure data. | Probably low<br><br>Outcome data are based on Federal Bureau of Investigation (FBI) National Incidence Based Reporting System (NIBRS), which it is routine and long-term and, thus, likely to be more reliable than other data collection systems. However, the study does not provide quality assurance of the outcome data. | Probably high<br><br>The study did not control for all primary confounders (time trend and seasonality). | Low<br><br>The daily crime/violence counts that are presented on Figure 1 show a reasonable distribution, hence providing evidence that inclusion of crime/violence in each time period is not based on any factor associated with the exposure. | Low<br><br>No outcome data was excluded inappropriately. | Low<br><br>Focused on violent crime which was all reported. | Low<br><br>Declared no competing financial interests. | Probably high<br><br>The use of autoregressive integrative moving average (ARIMA) analysis is not appropriate for count data. |
| DeFronzo 1984 <sup>15</sup>               | Probably high<br><br>The study used annual temperature                                                                                                                                                                                                                    | Probably high<br><br>Outcome data are based on the annual                                                                                                                                                                                                                                                                     | Probably low<br><br>The study did control for some                                                       | Probably high<br><br>Only included the Standard                                                                                                                                                                                                  | Probably high<br><br>Excluded the 62 SMSAs               | Probably low<br><br>All the outcomes that                   | Probably high<br><br>No                               | Probably low<br><br>Regression model was                                                                                      |

|                                    |                                                                                                                                                                                                                                 |                                                                                                                                                                                                        |                                                                                                                  |                                                              |                                                                                                                                                        |                                                                                                                                 |                                                                              |                                                                                                |
|------------------------------------|---------------------------------------------------------------------------------------------------------------------------------------------------------------------------------------------------------------------------------|--------------------------------------------------------------------------------------------------------------------------------------------------------------------------------------------------------|------------------------------------------------------------------------------------------------------------------|--------------------------------------------------------------|--------------------------------------------------------------------------------------------------------------------------------------------------------|---------------------------------------------------------------------------------------------------------------------------------|------------------------------------------------------------------------------|------------------------------------------------------------------------------------------------|
|                                    | data from U.S. Department of Commerce (1979), which might attenuate the true temperature effect. Also, no quality control of the temperature data is reported.                                                                  | Uniform Crime Reports, which it is routine and long-term. However, no quality control of the outcome data is reported.                                                                                 | primary confounders and other confounders.                                                                       | Metropolitan Statistical Areas (SMSAs) with high population. | with population less than 200,000. Total 142 SMSAs from 204 SMSAs.                                                                                     | the study pre-specified in the abstract and methods sections are explicitly reported.                                           | declaration of potential conflict of interest found.                         | conducted. However, there is no sensitivity analysis.                                          |
| FIELD 1992 <sup>16</sup>           | Probably high<br><br>The study used annual temperature data from Annual Abstract of Statistics (London: HMSO), which might attenuate the true temperature effect. Also, no quality control of the temperature data is reported. | Probably high<br><br>Outcome data are based on the annual Home Office Statistical Department. Also, no quality control of the outcome data is reported.                                                | Probably high<br><br>The study did not control for all primary confounders but controlled for other confounders. | Probably low<br><br>Included all the number of crimes.       | Probably low<br><br>No sufficient information to evaluate the completeness of the outcome data, but the large sample size suggests potential low risk. | Probably low<br><br>All the outcomes that the study pre-specified in the abstract and methods sections are explicitly reported. | Probably high<br><br>No declaration of potential conflict of interest found. | Probably low<br><br>Regression model was conducted. However, there is no sensitivity analysis. |
| Gamble and Hess 2012 <sup>17</sup> | Probably low<br><br>Daily temperature data were obtained from the National Climatic Data Center. However, the study does not provide quality assurance of the exposure data.                                                    | Probably low<br><br>Outcome data are based on Dallas Police Department, which it is routine and long-term and, thus, likely to be more reliable than other data collection systems. However, the study | Probably low<br><br>The study did control for some primary confounders and other confounders.                    | Probably low<br><br>Included all the number of crimes.       | Probably low<br><br>No sufficient information to evaluate the completeness of the outcome data, but the large sample size suggests potential low risk. | Low<br><br>Focused on aggravated assault, homicide, and rape, which was all reported.                                           | Low<br><br>Declared no competing financial interests.                        | Probably low<br><br>Regression model was conducted. However, there is no sensitivity analysis. |

|                                          |                                                                                                                                                                                                                                                        |                                                                                                                                                                                                                                                               |                                                                                                                                                                                                                                          |                                                                                                                                                                                                                                                   |                                                                                                                                                        |                                                            |                                                                                         |                                                                                                                                                                                            |
|------------------------------------------|--------------------------------------------------------------------------------------------------------------------------------------------------------------------------------------------------------------------------------------------------------|---------------------------------------------------------------------------------------------------------------------------------------------------------------------------------------------------------------------------------------------------------------|------------------------------------------------------------------------------------------------------------------------------------------------------------------------------------------------------------------------------------------|---------------------------------------------------------------------------------------------------------------------------------------------------------------------------------------------------------------------------------------------------|--------------------------------------------------------------------------------------------------------------------------------------------------------|------------------------------------------------------------|-----------------------------------------------------------------------------------------|--------------------------------------------------------------------------------------------------------------------------------------------------------------------------------------------|
|                                          |                                                                                                                                                                                                                                                        | does not provide quality assurance of the outcome data.                                                                                                                                                                                                       |                                                                                                                                                                                                                                          |                                                                                                                                                                                                                                                   |                                                                                                                                                        |                                                            |                                                                                         |                                                                                                                                                                                            |
| Gates, Klein et al. 2019 <sup>18</sup>   | Low<br><br>Daily mean temperature data were obtained from the National Oceanographic and Atmospheric Association of the United States and South Africa's Agricultural Research Council. Also, explored the data have been explored for missing values. | Probably low<br><br>Outcome data are based on Statistics South Africa, which it is routine and long-term and, thus, likely to be more reliable than other data collection systems. However, the study does not provide quality assurance of the outcome data. | Low<br><br>The study controlled for all primary confounders (time trend and seasonality) and considered different confounders (Day of the week, month, district, long-term trends, and unmeasured individual-level factors (e.g., age)). | Probably low<br><br>There is no direct evidence that inclusion of crime/violence in each time is not based on any factor associated with exposure. Since the data comes from Statistics South Africa, we assume the risk of bias is probably low. | Low<br><br>The coverage for crime and temperature dataset was high since the missing data were reconstructed.                                          | Low<br><br>Focused on homicide, which was all reported.    | Probably low<br><br>Have funding source, but declared no competing financial interests. | Low<br><br>A time stratified case-crossover was conducted. Different sensitivity analyses of the model were performed, which provide direct evidence that the used method was appropriate. |
| Heilmann, Kahn et al. 2021 <sup>19</sup> | Probably low<br><br>Daily maximum temperature data were obtained from the National Climatic Data Center (NCDC) administered by the National Oceanic and Atmospheric Administration (NOAA).                                                             | Probably low<br><br>Outcome data are based on city portal, which it is routine and long-term and, thus, likely to be more reliable than other data collection systems. However, the study does not provide quality                                            | Low<br><br>The study controlled for all primary confounders (time trend and seasonality) and considered different confounders (day of year, day of week, school vacation                                                                 | Probably low<br><br>Included all the number of crimes.                                                                                                                                                                                            | Probably low<br><br>No sufficient information to evaluate the completeness of the outcome data, but the large sample size suggests potential low risk. | Low<br><br>Focused on crime rates, which was all reported. | Probably high<br><br>No declaration of potential conflict of interest found.            | Low<br><br>Poisson fixed effects regression was conducted. Different sensitivity analyses of the model were performed, which provide direct evidence that the used                         |

|                                                |                                                                                                                                                                  |                                                                                                                                                                                                                                                    |                                                                                                                                |                                                        |                                                                                                                                                        |                                                                                                                                 |                                                                      |                                                                                                                                                     |
|------------------------------------------------|------------------------------------------------------------------------------------------------------------------------------------------------------------------|----------------------------------------------------------------------------------------------------------------------------------------------------------------------------------------------------------------------------------------------------|--------------------------------------------------------------------------------------------------------------------------------|--------------------------------------------------------|--------------------------------------------------------------------------------------------------------------------------------------------------------|---------------------------------------------------------------------------------------------------------------------------------|----------------------------------------------------------------------|-----------------------------------------------------------------------------------------------------------------------------------------------------|
|                                                | However, there is no mention of missing values.                                                                                                                  | assurance of the outcome data.                                                                                                                                                                                                                     | schedule, summer vacation, poverty level of neighborhood, and housing age).                                                    |                                                        |                                                                                                                                                        |                                                                                                                                 |                                                                      | method was appropriate.                                                                                                                             |
| Hodgkinson, Corcoran et al. 2023 <sup>20</sup> | Probably low<br><br>Daily temperature data were obtained from the Australian government's Bureau of Meteorology. However, there is no mention of missing values. | Probably low<br><br>Outcome data are based on Queensland Police Service though the Griffith Criminology Institute's Social Analytics Laboratory at Griffith University. However, the study does not provide quality assurance of the outcome data. | Probably low<br><br>The study did control for some primary confounders and other confounders.                                  | Probably low<br><br>Included all the number of crimes. | Probably low<br><br>No sufficient information to evaluate the completeness of the outcome data, but the large sample size suggests potential low risk. | Low<br><br>Focused on violent crimes, which was all reported.                                                                   | Low<br><br>Declared no competing financial interests                 | Probably low<br><br>Regression model was conducted. However, there is no sensitivity analysis.                                                      |
| Hou, Zhang et al. 2023 <sup>21</sup>           | Low<br><br>Daily mean temperature data were obtained from the US National Oceanic and Atmospheric Administration (NOAA). Also, explored the data have been       | Low<br><br>Outcome data are based on The Chicago urban crime dataset. Also, explored the data have been explored for missing values.                                                                                                               | Low<br><br>The study controlled for all primary confounders (time trend and seasonality) and considered different confounders. | Low<br><br>All the cases were included.                | Low<br><br>The coverage for crime and temperature dataset was high since the missing data were reconstructed.                                          | Probably low<br><br>All the outcomes that the study pre-specified in the abstract and methods sections are explicitly reported. | Probably low<br><br>Declared no known competing financial interests. | Low<br><br>Distributed lag nonlinear model was conducted. Different sensitivity analyses of the model were performed, which provide direct evidence |

|                                     |                                                                                                                                                          |                                                                                                                                                                                                                                                                                                                          |                                                                                                                                                                                                                                                           |                                                                                                                                                                                                                                                  |                                                                                                                                                        |                                                                                                                                 |                                                                     |                                                                                                                                                                                                                                                        |
|-------------------------------------|----------------------------------------------------------------------------------------------------------------------------------------------------------|--------------------------------------------------------------------------------------------------------------------------------------------------------------------------------------------------------------------------------------------------------------------------------------------------------------------------|-----------------------------------------------------------------------------------------------------------------------------------------------------------------------------------------------------------------------------------------------------------|--------------------------------------------------------------------------------------------------------------------------------------------------------------------------------------------------------------------------------------------------|--------------------------------------------------------------------------------------------------------------------------------------------------------|---------------------------------------------------------------------------------------------------------------------------------|---------------------------------------------------------------------|--------------------------------------------------------------------------------------------------------------------------------------------------------------------------------------------------------------------------------------------------------|
|                                     | explored for missing values.                                                                                                                             |                                                                                                                                                                                                                                                                                                                          |                                                                                                                                                                                                                                                           |                                                                                                                                                                                                                                                  |                                                                                                                                                        |                                                                                                                                 |                                                                     | that the used method was appropriate.                                                                                                                                                                                                                  |
| Hu, Wu et al. 2017 <sup>22</sup>    | Probably high<br><br>The study used heat stress indices. Also, no quality control of the temperature data is reported.                                   | Probably high<br><br>Outcome data are based on the monthly Municipal Public Safety Bureau of Tangshan. However, no quality control of the outcome data is reported.                                                                                                                                                      | High<br><br>The study did not control for primary confounders.                                                                                                                                                                                            | Probably low<br><br>Included all the number of crimes and Figure 1 has shown the temporal trend.                                                                                                                                                 | Probably low<br><br>No sufficient information to evaluate the completeness of the outcome data, but the large sample size suggests potential low risk. | Probably low<br><br>All the outcomes that the study pre-specified in the abstract and methods sections are explicitly reported. | Probably low<br><br>Declared no known competing financial interests | Probably low<br><br>Regression model was conducted. However, there is no study protocol.                                                                                                                                                               |
| Jung, Kim et al. 2020 <sup>23</sup> | Probably high<br><br>Weekly average temperature data were obtained from the Korean Meteorological Administration. There is no mention of missing values. | Probably high<br><br>Outcome data are based on Korean National Police Agency, which it is routine and long-term and, thus, likely to be more reliable than other data collection systems. However, the study does not provide quality assurance of the outcome data and the outcome was based on weekly value estimates. | Low<br><br>The study controlled for all primary confounders (time trend and seasonality) and considered different confounders (Population density, unemployment rate, proportion of elderly people, proportion of single-person households, proportion of | Low<br><br>The daily crime/violence counts that are presented on Figure 1 show a reasonable distribution, hence providing evidence that inclusion of crime/violence in each time period is not based on any factor associated with the exposure. | Probably low<br><br>No sufficient information to evaluate the completeness of the outcome data, but the large sample size suggests potential low risk. | Probably low<br><br>All the outcomes that the study pre-specified in the abstract and methods sections are explicitly reported. | Low<br><br>Declared no competing financial interests.               | Probably low<br><br>Generalized linear mixed models (GLMMs) was conducted. However, no tests or sensitivity analysis for checking the appropriateness of the model is reported. Hence, there is only indirect evidence that the method is appropriate. |

|                                      |                                                                                                                                                                                                           |                                                                                                                                                                                                                                                                                                                           |                                                                                                                                                                                                                                                          |                                                                                                                                                                                                                                                                |                                                                                                                                                        |                                                                                                                                 |                                                                              |                                                                                                                                                                                                                              |
|--------------------------------------|-----------------------------------------------------------------------------------------------------------------------------------------------------------------------------------------------------------|---------------------------------------------------------------------------------------------------------------------------------------------------------------------------------------------------------------------------------------------------------------------------------------------------------------------------|----------------------------------------------------------------------------------------------------------------------------------------------------------------------------------------------------------------------------------------------------------|----------------------------------------------------------------------------------------------------------------------------------------------------------------------------------------------------------------------------------------------------------------|--------------------------------------------------------------------------------------------------------------------------------------------------------|---------------------------------------------------------------------------------------------------------------------------------|------------------------------------------------------------------------------|------------------------------------------------------------------------------------------------------------------------------------------------------------------------------------------------------------------------------|
|                                      |                                                                                                                                                                                                           |                                                                                                                                                                                                                                                                                                                           | rental housing units, number of police officers per capita, number of CCTVs per capita, weekly precipitation and relative humidity).                                                                                                                     |                                                                                                                                                                                                                                                                |                                                                                                                                                        |                                                                                                                                 |                                                                              |                                                                                                                                                                                                                              |
| Jung, Chun et al. 2020 <sup>24</sup> | Probably high<br><br>Monthly mean temperature data were obtained from the Korean Meteorological Administration. There is no mention of missing values, and the values were aggregated in a monthly value. | Probably high<br><br>Outcome data are based on Korean National Police Agency, which it is routine and long-term and, thus, likely to be more reliable than other data collection systems. However, the study does not provide quality assurance of the outcome data and the outcome was based on monthly value estimates. | Low<br><br>The study controlled for all primary confounders (time trend and seasonality) and considered different confounders (monthly precipitation, BLSP household, 5 foreigner, divorce rate, migration rate, business density, and alcohol density). | Probably low<br><br>There is no direct evidence that inclusion of crime/violence in each time period is not based on any factor associated with exposure. Since the data comes from Korean National Police Agency, we assume the risk of bias is probably low. | Probably low<br><br>No sufficient information to evaluate the completeness of the outcome data, but the large sample size suggests potential low risk. | Probably low<br><br>All the outcomes that the study pre-specified in the abstract and methods sections are explicitly reported. | Probably high<br><br>No declaration of potential conflict of interest found. | Probably low<br><br>Poisson model was conducted. However, no tests or sensitivity analysis for checking the appropriateness of the model is reported. Hence, there is only indirect evidence that the method is appropriate. |
| Kim, Kim et al 2023 <sup>25</sup>    | Probably low<br><br>Daily maximum temperature data were obtained                                                                                                                                          | Probably low<br><br>Outcome data are based on Statistics Korea. However,                                                                                                                                                                                                                                                  | Low<br><br>The study controlled for all primary                                                                                                                                                                                                          | Low<br><br>The distribution in Figure 1 for daily temperature                                                                                                                                                                                                  | Probably low<br><br>No sufficient information to                                                                                                       | Probably low<br><br>All the outcomes that the study pre-                                                                        | Probably low                                                                 | Probably low<br><br>A time stratified case-crossover was                                                                                                                                                                     |



|                                        |                                                                                                                                                                                                                          |                                                                                                                                                                                                                                                                 |                                                                                                                                                                                                                          |                                                                                                                                                                                                                                                                             |                                                                                                                                                        |                                                                                                                                 |                                                                      |                                                                                                                                                                                                                                  |
|----------------------------------------|--------------------------------------------------------------------------------------------------------------------------------------------------------------------------------------------------------------------------|-----------------------------------------------------------------------------------------------------------------------------------------------------------------------------------------------------------------------------------------------------------------|--------------------------------------------------------------------------------------------------------------------------------------------------------------------------------------------------------------------------|-----------------------------------------------------------------------------------------------------------------------------------------------------------------------------------------------------------------------------------------------------------------------------|--------------------------------------------------------------------------------------------------------------------------------------------------------|---------------------------------------------------------------------------------------------------------------------------------|----------------------------------------------------------------------|----------------------------------------------------------------------------------------------------------------------------------------------------------------------------------------------------------------------------------|
|                                        | from the Korean Meteorological Administration (KMA). However, there is no mention of missing values.                                                                                                                     | the study does not provide quality assurance of the outcome data.                                                                                                                                                                                               | confounders (time trend and seasonality) and considered different confounders.                                                                                                                                           | and gun-related crimes are evenly distributed.                                                                                                                                                                                                                              | evaluate the completeness of the outcome data, but the large sample size suggests potential low risk.                                                  | specified in the abstract and methods sections are explicitly reported.                                                         | Declared no known competing financial interests.                     | conducted. However, there is no sensitivity analysis.                                                                                                                                                                            |
| Le, Berman et al. 2022 <sup>26</sup>   | Probably low<br><br>Daily mean temperature data were obtained from the weather station from The National Centre for Hydro-Meteorological Forecasting (NCHMF) of Vietnam. However, there is no mention of missing values. | Low<br><br>Outcome data are based on daily number of crime events reported by Hanoi Police Department (HPD), which it is routine and long-term and, thus, likely to be more reliable than other data collection systems. Also, they have validated the dataset. | Low<br><br>The study controlled for all primary confounders (time trend and seasonality) and considered different confounders (Day of week, public holidays, humidity, rainfall, and air pollution (PM <sub>10</sub> )). | Probably low<br><br>There is no direct evidence that inclusion of crime/violence in each time period is not based on any factor associated with exposure. Since the data comes from PC02 Department, Police Headquarters Hanoi, we assume the risk of bias is probably low. | Probably low<br><br>No sufficient information to evaluate the completeness of the outcome data, but the large sample size suggests potential low risk. | Probably low<br><br>All the outcomes that the study pre-specified in the abstract and methods sections are explicitly reported. | Probably low<br><br>Declared no known competing financial interests. | Low<br><br>Quasi-Poisson regression with distributed lag non-linear models (DLNMs) was conducted Different sensitivity analyses of the model were performed, which provide direct evidence that the used method was appropriate. |
| Lemon and Partridge 2017 <sup>27</sup> | Probably low<br><br>Daily maximum temperature from 9 weather stations (UK meteorological office integrated                                                                                                               | Probably high<br><br>Outcome data are based on daily counts from the local violence surveillances scheme run in three                                                                                                                                           | Probably low<br><br>The study controlled for some of the primary confounders (time trend) and                                                                                                                            | Low<br><br>The daily crime/violence counts that are presented on Figure 2 show a reasonable                                                                                                                                                                                 | Probably low<br><br>No sufficient information to evaluate the completeness of the outcome data, but the                                                | Probably low<br><br>All the outcomes that the study pre-specified in the abstract and methods                                   | Low<br><br>Declared no competing financial interests.                | Probably low<br><br>Negative binomial regression was conducted. However, no tests or                                                                                                                                             |

|                                             |                                                                                                                                                                      |                                                                                                                                                               |                                                                                                                                 |                                                                                                                                                                          |                                                                                                                                                        |                                                                                                                                 |                                                                      |                                                                                                                    |
|---------------------------------------------|----------------------------------------------------------------------------------------------------------------------------------------------------------------------|---------------------------------------------------------------------------------------------------------------------------------------------------------------|---------------------------------------------------------------------------------------------------------------------------------|--------------------------------------------------------------------------------------------------------------------------------------------------------------------------|--------------------------------------------------------------------------------------------------------------------------------------------------------|---------------------------------------------------------------------------------------------------------------------------------|----------------------------------------------------------------------|--------------------------------------------------------------------------------------------------------------------|
|                                             | data archive system (MIDAS)). However, there is no mention of missing values.                                                                                        | hospitals through paper-based questionnaires, which might have biases (e.g., recall bias).                                                                    | considered different confounders (alcohol factor, and fixed effect of hospitals).                                               | distribution, hence providing evidence that inclusion of crime/violence in each time period is not based on any factor associated with the exposure.                     | large sample size suggests potential low risk.                                                                                                         | sections are explicitly reported.                                                                                               |                                                                      | sensitivity analysis for checking the appropriateness of the model is reported.                                    |
| Li, Feng et al. 2023 <sup>28</sup>          | High<br><br>The study used annual temperature data, which might attenuate the true temperature effect. Also, no quality control of the temperature data is reported. | High<br><br>Outcome data are based on the annual violence from World Health Organization (WHO). Also, no quality control of the outcome data is reported      | Probably low<br><br>The study controlled for some of the primary confounders (time trend) and considered different confounders. | Low<br><br>This study included multiple locations from different countries.                                                                                              | Probably low<br><br>No sufficient information to evaluate the completeness of the outcome data, but the large sample size suggests potential low risk. | Probably low<br><br>All the outcomes that the study pre-specified in the abstract and methods sections are explicitly reported. | Probably low<br><br>Declared no known competing financial interests. | Probably low<br><br>Multivariate linear regression model was conducted. However, there is no sensitivity analysis. |
| Linning, Andresen et al. 2017 <sup>29</sup> | Probably high<br><br>Monthly temperature from Environment Canada historical climate data webpage was used. Also, there is no mention of missing values.              | Probably low<br><br>Outcome data are based on daily Ottawa Police Service website. However, the study does not provide quality assurance of the outcome data. | Probably low<br><br>The study controlled for some of the primary confounders (season) and considered different confounders.     | Low<br><br>The monthly crime/violence counts that are presented on Figure 1 show a reasonable distribution, hence providing evidence that inclusion of crime/violence in | Probably low<br><br>No sufficient information to evaluate the completeness of the outcome data, but the large sample size suggests potential low risk. | Low<br><br>Focused on property crime, which was all reported.                                                                   | Probably low<br><br>Declared no known competing financial interests. | Probably low<br><br>Multivariate linear regression model was conducted. However, there is no sensitivity analysis. |

|                                              |                                                                                                                                                                                                                                                                       |                                                                                                                                                                                                                                                                                                                 |                                                                                                                                 |                                                                                                                                                                                                                                                  |                                                                                                                                                        |                                                                                                                                 |                                                                              |                                                                                                                                                                                                                         |
|----------------------------------------------|-----------------------------------------------------------------------------------------------------------------------------------------------------------------------------------------------------------------------------------------------------------------------|-----------------------------------------------------------------------------------------------------------------------------------------------------------------------------------------------------------------------------------------------------------------------------------------------------------------|---------------------------------------------------------------------------------------------------------------------------------|--------------------------------------------------------------------------------------------------------------------------------------------------------------------------------------------------------------------------------------------------|--------------------------------------------------------------------------------------------------------------------------------------------------------|---------------------------------------------------------------------------------------------------------------------------------|------------------------------------------------------------------------------|-------------------------------------------------------------------------------------------------------------------------------------------------------------------------------------------------------------------------|
|                                              |                                                                                                                                                                                                                                                                       |                                                                                                                                                                                                                                                                                                                 |                                                                                                                                 | each time period is not based on any factor associated with the exposure.                                                                                                                                                                        |                                                                                                                                                        |                                                                                                                                 |                                                                              |                                                                                                                                                                                                                         |
| Linning, Andresen et al. 2017b <sup>30</sup> | Probably high<br><br>Temperature from Environment Canada historical climate data webpage was used. Also, there is no mention of missing values.                                                                                                                       | Probably high<br><br>Outcome data are based on the Crime Analysis System, Pacific Region (CASPR), which is collected from eight cities in British Columbia. It is in monthly counts.                                                                                                                            | Probably low<br><br>The study controlled for some of the primary confounders (time trend) and considered different confounders. | Probably low<br><br>Included outcomes multiple cities from Canada.                                                                                                                                                                               | Probably low<br><br>No sufficient information to evaluate the completeness of the outcome data, but the large sample size suggests potential low risk. | Probably low<br><br>All the outcomes that the study pre-specified in the abstract and methods sections are explicitly reported. | Probably high<br><br>No declaration of potential conflict of interest found. | Probably low<br><br>Poisson regression model was conducted. However, there is no sensitivity analysis.                                                                                                                  |
| Lynch, Stretesky et al. 2020 <sup>31</sup>   | Probably high<br><br>The study used annual temperature data for measuring exposure, which might attenuate the true temperature effect or capture seasonal effects rather than true temperature effects. Also, no quality control of the temperature data is reported. | Probably high<br><br>Annual death records from the New York Federal Bureau of Investigation's Uniform Crime Reports online database system. London U.K. Home Office are used. Given the probably low reliability of vital registry and municipal data from countries in the region, there is a possibility that | Probably high<br><br>The study did not adjust for any of the primary confounders.                                               | Low<br><br>The daily crime/violence counts that are presented on Figure 2 show a reasonable distribution, hence providing evidence that inclusion of crime/violence in each time period is not based on any factor associated with the exposure. | Probably low<br><br>No sufficient information to evaluate the completeness of the outcome data, but the large sample size suggests potential low risk. | Probably low<br><br>All the outcomes that the study pre-specified in the abstract and methods sections are explicitly reported. | Low<br><br>Declared no competing financial interests.                        | Probably high<br><br>The study makes inferences about the association between temperature and mortality based on ordinary least squares regression model (OLS). Also, no tests or sensitivity analysis for checking the |

|                                            |                                                                                                                                                            |                                                                                                                                                                          |                                                                                                                                |                                                                    |                                                                                                                                                        |                                                                                                                                 |                                                              |                                                                                                                                                                             |
|--------------------------------------------|------------------------------------------------------------------------------------------------------------------------------------------------------------|--------------------------------------------------------------------------------------------------------------------------------------------------------------------------|--------------------------------------------------------------------------------------------------------------------------------|--------------------------------------------------------------------|--------------------------------------------------------------------------------------------------------------------------------------------------------|---------------------------------------------------------------------------------------------------------------------------------|--------------------------------------------------------------|-----------------------------------------------------------------------------------------------------------------------------------------------------------------------------|
|                                            |                                                                                                                                                            | not all deaths in the study period have been captured, which can affect the final study results. Also, the study does not provide quality assurance of the outcome data. |                                                                                                                                |                                                                    |                                                                                                                                                        |                                                                                                                                 |                                                              | appropriateness of the model is reported.                                                                                                                                   |
| Lynch, Stretesky et al. 2022 <sup>32</sup> | Probably high<br><br>Annual temperature from National Oceanic and Atmospheric Administration (NOAA) was used. Also, there is no mention of missing values. | Probably high<br><br>Annual outcome records, which can affect the final study results. Also, the study does not provide quality assurance of the outcome data.           | High<br><br>The study focused on the correlation.                                                                              | Probably low<br><br>Included outcome from various cities.          | Probably high<br><br>There were some missing datasets and were not solved.                                                                             | Probably low<br><br>All the outcomes that the study pre-specified in the abstract and methods sections are explicitly reported. | Low<br><br>Declared no competing financial interests.        | High<br><br>Correlation analysis is done. More main regression analysis and sensitivity analysis is needed.                                                                 |
| Lyons, Gause et al. 2022 <sup>33</sup>     | Probably low<br><br>Daily maximum temperature from North American Land Data Assimilation System Phase 2. However, there is no mention of missing values.   | Low<br><br>Outcome records were captured using Gun Violence Archive (GVA) data. The study did provide quality assurance of the outcome data.                             | Low<br><br>The study controlled for all primary confounders (time trend and seasonality) and considered different confounders. | Probably low<br><br>Included outcome from various cities from USA. | Probably low<br><br>No sufficient information to evaluate the completeness of the outcome data, but the large sample size suggests potential low risk. | Probably low<br><br>All the outcomes that the study pre-specified in the abstract and methods sections are explicitly reported. | Probably High<br><br>Declared competing financial interests. | Low<br><br>Quasi-Poisson regression with distributed lag non-linear models (DLNMs) was conducted. Different sensitivity analyses of the model were performed, which provide |

|                                           |                                                                                                                                    |                                                                                                                                                                                                                                                                                    |                                                                                                        |                                                                                                                                                                                                                                                                                                                                                                            |                                                                                           |                                                                                                                                 |                                                                              |                                                                                                                                                            |
|-------------------------------------------|------------------------------------------------------------------------------------------------------------------------------------|------------------------------------------------------------------------------------------------------------------------------------------------------------------------------------------------------------------------------------------------------------------------------------|--------------------------------------------------------------------------------------------------------|----------------------------------------------------------------------------------------------------------------------------------------------------------------------------------------------------------------------------------------------------------------------------------------------------------------------------------------------------------------------------|-------------------------------------------------------------------------------------------|---------------------------------------------------------------------------------------------------------------------------------|------------------------------------------------------------------------------|------------------------------------------------------------------------------------------------------------------------------------------------------------|
|                                           |                                                                                                                                    |                                                                                                                                                                                                                                                                                    |                                                                                                        |                                                                                                                                                                                                                                                                                                                                                                            |                                                                                           |                                                                                                                                 |                                                                              | direct evidence that the used method was appropriate.                                                                                                      |
| Mapou, Shendell et al. 2017 <sup>34</sup> | Probably low<br><br>Daily mean temperature from database from the Weather Channel. However, there is no mention of missing values. | Probably low<br><br>Outcome data are based on open access crime data sources for each city, which it is routine and long-term and, thus, likely to be more reliable than other data collection systems. However, the study does not provide quality assurance of the outcome data. | Probably low<br><br>The study controlled for all the primary confounders (time trend and seasonality). | Probably low<br><br>There is no direct evidence that inclusion of crime/violence in each time period is not based on any factor associated with exposure. Since the data comes from City of Chicago Data Portal, Houston Police Department Crime Statistics, Open Data Philly, and Data.Seattle.gov, for each different cities we assume the risk of bias is probably low. | Low<br><br>No outcome data was excluded inappropriately.                                  | Probably low<br><br>All the outcomes that the study pre-specified in the abstract and methods sections are explicitly reported. | Probably high<br><br>No declaration of potential conflict of interest found. | Probably low<br><br>Poisson regression was conducted. However, no tests or sensitivity analysis for checking the appropriateness of the model is reported. |
| Mares 2013 <sup>35</sup>                  | Probably high<br><br>The study used monthly temperature data for measuring exposure, which                                         | Probably high<br><br>Outcome data are based on Saint Louis Metropolitan Police Department's                                                                                                                                                                                        | Probably low<br><br>The study controlled for some primary confounders (seasonality)                    | Probably low<br><br>Included outcome from various subgroups near St. Louis.                                                                                                                                                                                                                                                                                                | Probably low<br><br>No sufficient information to evaluate the completeness of the outcome | Probably low<br><br>All the outcomes that the study pre-specified in the abstract                                               | Probably high<br><br>No declaration of potential                             | Probably low<br><br>Regression analysis was conducted. However, no tests or                                                                                |

|                                      |                                                                                                                                                                                                       |                                                                                                                                                                                                                                                                               |                                                                                                           |                                                                                         |                                                                                                                                                        |                                                                                                                                 |                                                                              |                                                                                                                                                             |
|--------------------------------------|-------------------------------------------------------------------------------------------------------------------------------------------------------------------------------------------------------|-------------------------------------------------------------------------------------------------------------------------------------------------------------------------------------------------------------------------------------------------------------------------------|-----------------------------------------------------------------------------------------------------------|-----------------------------------------------------------------------------------------|--------------------------------------------------------------------------------------------------------------------------------------------------------|---------------------------------------------------------------------------------------------------------------------------------|------------------------------------------------------------------------------|-------------------------------------------------------------------------------------------------------------------------------------------------------------|
|                                      | might attenuate the true temperature effect. Also, no quality control of the temperature data is reported.                                                                                            | Uniform Crime Report, which it is routine and long-term and, thus, likely to be more reliable than other data collection systems. However, it is based on monthly average counts.                                                                                             | and other confounders.                                                                                    |                                                                                         | data, but the large sample size suggests potential low risk.                                                                                           | and methods sections are explicitly reported.                                                                                   | conflict of interest found.                                                  | sensitivity analysis for checking the appropriateness of the model is reported                                                                              |
| Mares 2013b <sup>36</sup>            | Probably high<br><br>The study used monthly temperature data for measuring exposure, which might attenuate the true temperature effect. Also, no quality control of the temperature data is reported. | Probably high<br><br>Outcome data are based on Saint Louis Metropolitan Police Department's Uniform Crime Report, which it is routine and long-term and, thus, likely to be more reliable than other data collection systems. However, it is based on monthly average counts. | Probably low<br><br>The study controlled for some primary confounders (seasonality) and other confounders | Probably low<br><br>Included outcome from St. Louis.                                    | Probably low<br><br>No sufficient information to evaluate the completeness of the outcome data, but the large sample size suggests potential low risk. | Probably low<br><br>All the outcomes that the study pre-specified in the abstract and methods sections are explicitly reported. | Probably high<br><br>No declaration of potential conflict of interest found. | Probably low<br><br>Regression analysis was conducted. However, no tests or sensitivity analysis for checking the appropriateness of the model is reported. |
| Mares and Moffett 2016 <sup>37</sup> | Probably low<br><br>The study used annual temperature data for measuring exposure, which might attenuate the                                                                                          | Probably low<br><br>Outcome data are based on United Nations. Also, the details were provided.                                                                                                                                                                                | Probably high<br><br>The study did not control for primary confounders but                                | Probably low<br><br>Included different countries with available dataset (57 countries). | Probably low<br><br>No sufficient information to evaluate the completeness of the outcome                                                              | Low<br><br>Focused on homicide, which was all reported.                                                                         | Probably low<br><br>Declared no known competing                              | Low<br><br>Various analysis and sensitivity analysis was conducted.                                                                                         |

|                                                     |                                                                                                                                                                                                                    |                                                                                                                                          |                                                                                                                 |                                                                                                             |                                                                                                                                                               |                                                                                                                                        |                                                                                     |                                                                                                                                                                            |
|-----------------------------------------------------|--------------------------------------------------------------------------------------------------------------------------------------------------------------------------------------------------------------------|------------------------------------------------------------------------------------------------------------------------------------------|-----------------------------------------------------------------------------------------------------------------|-------------------------------------------------------------------------------------------------------------|---------------------------------------------------------------------------------------------------------------------------------------------------------------|----------------------------------------------------------------------------------------------------------------------------------------|-------------------------------------------------------------------------------------|----------------------------------------------------------------------------------------------------------------------------------------------------------------------------|
|                                                     | <p>true temperature effect. However, the quality control and validation of the exposure dataset.</p>                                                                                                               |                                                                                                                                          | <p>adjust for other confounders.</p>                                                                            |                                                                                                             | <p>data, but the large sample size suggests potential low risk.</p>                                                                                           |                                                                                                                                        | <p>financial interests.</p>                                                         |                                                                                                                                                                            |
| <p>Mares and Moffett 2019<sup>38</sup></p>          | <p>Probably low</p> <p>The study used monthly temperature data for measuring exposure, which might attenuate the true temperature effect. However, the quality control and validation of the exposure dataset.</p> | <p>Probably low</p> <p>Outcome data are based on Uniform Crime Reporting (UCR). Also, the details were provided.</p>                     | <p>Probably high</p> <p>The study did not control for primary confounders but adjust for other confounders.</p> | <p>Probably low</p> <p>Included the continental US.</p>                                                     | <p>Low</p> <p>The study indicates that average 94.8% of the state's report the outcome data for each month.</p>                                               | <p>Probably low</p> <p>All the outcomes that the study pre-specified in the abstract and methods sections are explicitly reported.</p> | <p>Probably high</p> <p>No declaration of potential conflict of interest found.</p> | <p>Probably low</p> <p>Negative binomial regression was conducted. However, no tests or sensitivity analysis for checking the appropriateness of the model is reported</p> |
| <p>Maystadt, Calderone et al. 2014<sup>39</sup></p> | <p>Probably low</p> <p>The study used monthly temperature data for measuring exposure, which might attenuate the true temperature effect. However, the quality control and validation of the exposure dataset.</p> | <p>Probably low</p> <p>Outcome data are based on Armed Conflict Location and Event Dataset (ACLED). Also, the details were provided.</p> | <p>Probably low</p> <p>The study controlled for some primary confounders (time trend) and other confounders</p> | <p>Low</p> <p>Figure 2 representing the mean temperature and violent conflicts were evenly distributed.</p> | <p>Probably low</p> <p>No sufficient information to evaluate the completeness of the outcome data, but the large sample size suggests potential low risk.</p> | <p>Probably low</p> <p>All the outcomes that the study pre-specified in the abstract and methods sections are explicitly reported.</p> | <p>Probably low</p> <p>Declared no known competing financial interests.</p>         | <p>Low</p> <p>Various analysis and sensitivity analysis was conducted.</p>                                                                                                 |
| <p>McLean 2007<sup>40</sup></p>                     | <p>Probably low</p>                                                                                                                                                                                                | <p>Probably low</p>                                                                                                                      | <p>Probably high</p>                                                                                            | <p>Probably low</p>                                                                                         | <p>Probably low</p>                                                                                                                                           | <p>Probably low</p>                                                                                                                    | <p>Probably high</p>                                                                | <p>Probably high</p>                                                                                                                                                       |

|                                        |                                                                                                                                                                                                                                                        |                                                                                                                                                                                                    |                                                                                                           |                                                       |                                                                                                                                                        |                                                                                                                                 |                                                                      |                                                                                                                                                                      |
|----------------------------------------|--------------------------------------------------------------------------------------------------------------------------------------------------------------------------------------------------------------------------------------------------------|----------------------------------------------------------------------------------------------------------------------------------------------------------------------------------------------------|-----------------------------------------------------------------------------------------------------------|-------------------------------------------------------|--------------------------------------------------------------------------------------------------------------------------------------------------------|---------------------------------------------------------------------------------------------------------------------------------|----------------------------------------------------------------------|----------------------------------------------------------------------------------------------------------------------------------------------------------------------|
|                                        | The study used daily temperature data for measuring exposure from Manchester Airport. However, the quality control and validation of the exposure dataset.                                                                                             | Outcome data are based on St. Mary's Sexual Assault Referral Centre in Manchester. However, the study does not provide quality assurance of the outcome data.                                      | The study did not control for primary confounders.                                                        | Included outcomes from Manchester.                    | No sufficient information to evaluate the completeness of the outcome data, but the large sample size suggests potential low risk.                     | All the outcomes that the study pre-specified in the abstract and methods sections are explicitly reported.                     | No declaration of potential conflict of interest found.              | The correlation analysis was mainly done, and the regression analysis adjusted few variables. No sensitivity analysis                                                |
| Michel, Wang et al. 2016 <sup>41</sup> | Probably low<br><br>The study used daily temperature data for measuring exposure from the Global Historical Climate Network via the website of the National Climatic Data Center. However, the quality control and validation of the exposure dataset. | Probably low<br><br>Outcome data are based on daily Victim Based Crime Data on the Baltimore Police Department Website. However, the study does not provide quality assurance of the outcome data. | Probably low<br><br>The study controlled for some primary confounders (time trend) and other confounders. | Probably low<br><br>Included outcomes from Baltimore. | Probably low<br><br>No sufficient information to evaluate the completeness of the outcome data, but the large sample size suggests potential low risk. | Probably low<br><br>All the outcomes that the study pre-specified in the abstract and methods sections are explicitly reported. | Low<br><br>Declared no competing financial interests.                | Probably low<br><br>Negative binomial regression was conducted. However, no tests or sensitivity analysis for checking the appropriateness of the model is reported. |
| Muzafar Shah 2017 <sup>42</sup>        | Probably high<br><br>The study used monthly temperature data for measuring exposure, which might attenuate the true temperature effect. Also, no                                                                                                       | Probably high<br><br>Outcome data are based on Malaysia's Statistical Yearbook published by the Department of Statistics Malaysia. Also, no quality                                                | Probably high<br><br>The study did not control for primary confounders.                                   | Probably low<br><br>Included outcomes from Malaysia.  | Probably low<br><br>No sufficient information to evaluate the completeness of the outcome data, but the large sample size suggests                     | Probably low<br><br>All the outcomes that the study pre-specified in the abstract and methods sections are                      | Probably low<br><br>Declared no known competing financial interests. | Probably high<br><br>No sensitivity analysis was done.                                                                                                               |



|                                                |                                                                                                                                                                                                                  |                                                                                                                                                                                                 |                                                                                                          |                                                                                                      |                                                                            |                                                                                                                                 |                                                                      |                                                                                                                                                        |
|------------------------------------------------|------------------------------------------------------------------------------------------------------------------------------------------------------------------------------------------------------------------|-------------------------------------------------------------------------------------------------------------------------------------------------------------------------------------------------|----------------------------------------------------------------------------------------------------------|------------------------------------------------------------------------------------------------------|----------------------------------------------------------------------------|---------------------------------------------------------------------------------------------------------------------------------|----------------------------------------------------------------------|--------------------------------------------------------------------------------------------------------------------------------------------------------|
|                                                | quality control of the temperature data is reported.                                                                                                                                                             | control of the outcome data is reported.                                                                                                                                                        |                                                                                                          |                                                                                                      | potential low risk.                                                        | explicitly reported.                                                                                                            |                                                                      |                                                                                                                                                        |
| O'Loughlin, Linke et al. 2014 <sup>43</sup>    | Probably low<br><br>The study used monthly gridded temperature data for measuring exposure, which might attenuate the true temperature effect. However, the quality control of the temperature data is reported. | Probably high<br><br>Outcome data are based on Armed Conflict Location and Event Dataset (ACLED), which is based on media reports. However, no quality control of the outcome data is reported. | Probably high<br><br>The study did not control for primary confounders.                                  | Low<br><br>Figure 1 representing the mean temperature and violent conflicts were evenly distributed. | Low<br><br>Focused on violent events, which was all reported.              | Probably low<br><br>All the outcomes that the study pre-specified in the abstract and methods sections are explicitly reported. | Probably low<br><br>Declared no known competing financial interests. | Probably low<br><br>Poisson within-between multilevel model-random effects (MLM-RE) and some sensitivity analysis was done.                            |
| O'Loughlin, Witmer et al. 2012 <sup>44</sup>   | Probably high<br><br>The study used monthly gridded temperature data for measuring exposure, which might attenuate the true temperature effect. Also, no quality control of the temperature data is reported.    | Probably high<br><br>Outcome data are based on Armed Conflict Location and Event Dataset (ACLED), which is based on media reports. However, no quality control of the outcome data is reported. | Probably low<br><br>The study controlled for some primary confounders (time trend) and other confounders | Low<br><br>Figure S1 representing the violent conflicts were evenly distributed.                     | Low<br><br>Focused on violent events, which was all reported.              | Probably low<br><br>All the outcomes that the study pre-specified in the abstract and methods sections are explicitly reported. | Probably low<br><br>Declared no known competing financial interests. | Low<br><br>Generalized linear model and generalized additive model was used and sensitivity analysis checking the robustness of the model is reported. |
| Otrachshenko, Popova et al. 2021 <sup>45</sup> | Probably low<br><br>The study used daily temperature data for measuring exposure from                                                                                                                            | Probably high<br><br>Outcome data are based on Russian Federal State Statistics Service                                                                                                         | Probably low<br><br>The study controlled for some primary confounders                                    | Probably low<br><br>Included outcomes from Russia.                                                   | Probably low<br><br>No sufficient information to evaluate the completeness | Probably low<br><br>All the outcomes that the study pre-specified in                                                            | Probably high<br><br>No declaration                                  | Low<br><br>Econometric model was used and sensitivity                                                                                                  |

|                                            |                                                                                                                                                                                                                                 |                                                                                                                                                                                              |                                                                                                           |                                                                                                     |                                                                                                                                                        |                                                                                                                                 |                                                                      |                                                                                                                                   |
|--------------------------------------------|---------------------------------------------------------------------------------------------------------------------------------------------------------------------------------------------------------------------------------|----------------------------------------------------------------------------------------------------------------------------------------------------------------------------------------------|-----------------------------------------------------------------------------------------------------------|-----------------------------------------------------------------------------------------------------|--------------------------------------------------------------------------------------------------------------------------------------------------------|---------------------------------------------------------------------------------------------------------------------------------|----------------------------------------------------------------------|-----------------------------------------------------------------------------------------------------------------------------------|
|                                            | meteorological ground stations. However, no quality control of the temperature data is reported.                                                                                                                                | and the Russian Fertility and Mortality Database (RusFMD 2016). Also, no quality control of the outcome data is reported.                                                                    | (time trend) and other confounders                                                                        |                                                                                                     | of the outcome data, but the large sample size suggests potential low risk.                                                                            | the abstract and methods sections are explicitly reported.                                                                      | of potential conflict of interest found.                             | analysis checking the robustness of the model is reported.                                                                        |
| Pacillo, Kangogo et al. 2022 <sup>46</sup> | Probably high<br><br>The study used monthly temperature data for measuring exposure from Climate Hazards Group InfraRed Precipitation with Station data (CHIRPS). Also, no quality control of the temperature data is reported. | Probably high<br><br>Outcome data are based on Armed Conflict Location and Event Dataset (ACLED), which is based on media reports. Also, no quality control of the outcome data is reported. | High<br><br>Structural equation modeling was mainly conducted.                                            | Probably low<br><br>Included outcomes from Mali.                                                    | Probably low<br><br>No sufficient information to evaluate the completeness of the outcome data, but the large sample size suggests potential low risk. | Probably low<br><br>All the outcomes that the study pre-specified in the abstract and methods sections are explicitly reported. | Probably low<br><br>Declared no known competing financial interests. | Probably high<br><br>The main analysis is done using the SEM approach, and no sensitivity analysis was done.                      |
| Peng, Xueming et al. 2011 <sup>47</sup>    | Probably low<br><br>The study used daily temperature data from Central Meteorological Station of China. However, no quality control of the temperature data is reported                                                         | Low<br><br>Outcome data are based on daily Beijing Municipal Public Safety Bureau records. Also, the missing dataset was indicated.                                                          | Probably low<br><br>The study controlled for some primary confounders (time trend) and other confounders. | Low<br><br>Figure 3 indicates the number of outcome and average temperature was evenly distributed. | Low<br><br>About 1 % of low-quality outcome dataset was excluded.                                                                                      | Probably high<br><br>A lot of the crime dataset was collected, but robbery and burglary were reported.                          | Low<br><br>Declared no competing financial interests.                | Probably low<br><br>Regression analysis was conducted. However, no tests or sensitivity analysis for checking the appropriateness |

|                                                     |                                                                                                                                                                                               |                                                                                                                                                                      |                                                                                                           |                                                                                   |                                                                                                                                                        |                                                                                                                                 |                                                                      |                                                                                                            |
|-----------------------------------------------------|-----------------------------------------------------------------------------------------------------------------------------------------------------------------------------------------------|----------------------------------------------------------------------------------------------------------------------------------------------------------------------|-----------------------------------------------------------------------------------------------------------|-----------------------------------------------------------------------------------|--------------------------------------------------------------------------------------------------------------------------------------------------------|---------------------------------------------------------------------------------------------------------------------------------|----------------------------------------------------------------------|------------------------------------------------------------------------------------------------------------|
|                                                     |                                                                                                                                                                                               |                                                                                                                                                                      |                                                                                                           |                                                                                   |                                                                                                                                                        |                                                                                                                                 |                                                                      | of the model is reported.                                                                                  |
| Peng and Zhan 2022 <sup>48</sup>                    | Probably low<br><br>The study used daily temperature data were obtained from the National Meteorological Science Data Center. However, no quality control of the temperature data is reported | High<br><br>Outcome data are based on annual work reports of local procuratorates in each region. Also, no quality control of the outcome data is reported.          | Probably high<br><br>The study controlled no primary confounders but controlled for other confounders.    | Probably low<br><br>The study included multiple prefecture-level cities in China. | Low<br><br>The outcome missing dataset was filled by linear interpolation.                                                                             | Probably low<br><br>All the outcomes that the study pre-specified in the abstract and methods sections are explicitly reported. | Probably low<br><br>Declared no known competing financial interests. | Low<br><br>Regression model was conducted, and the robustness of the model was done.                       |
| Potgieter, Fabris-Rotelli et al. 2022 <sup>49</sup> | Probably low<br><br>The study used daily temperature data were obtained from the South African Weather Service. However, no quality control of the temperature data is reported.              | Probably low<br><br>Outcome data are based on daily South African Police Services (SAPS). However, the study does not provide quality assurance of the outcome data. | Probably low<br><br>The study controlled for some primary confounders (time trend) and other confounders. | Probably low<br><br>The study included outcomes from Khayelitsha.                 | Probably low<br><br>No sufficient information to evaluate the completeness of the outcome data, but the large sample size suggests potential low risk. | Probably low<br><br>All the outcomes that the study pre-specified in the abstract and methods sections are explicitly reported. | Low<br><br>Declared no competing financial interests.                | Low<br><br>Distributed lag non-linear model was conducted, and the robustness of the model was done.       |
| Rahman, Lorenzo et al. 2023 <sup>50</sup>           | Low<br><br>The study used daily temperature data from gridded dataset. Also, the validation of the exposure is mentioned.                                                                     | Low<br><br>Outcome data are based on daily The California Department of Public Health. Also, the validation of the outcome is mentioned.                             | Probably low<br><br>The study controlled for some primary confounders (time trend) and other confounders. | Probably low<br><br>The study included outcomes from California.                  | Probably low<br><br>No sufficient information to evaluate the completeness of the outcome data, but the large sample size suggests                     | Low<br><br>Focused on homicide, which was all reported.                                                                         | Probably low<br><br>Declared no known competing financial interests. | Low<br><br>Distributed lag non-linear model and various regression model was conducted, and the robustness |

|                                         |                                                                                                                                                                                                                        |                                                                                                                                                                                 |                                                                                                           |                                                                                                                                                                   |                                                                                                                                                        |                                                                                             |                                                                              |                                                                                                                                                             |
|-----------------------------------------|------------------------------------------------------------------------------------------------------------------------------------------------------------------------------------------------------------------------|---------------------------------------------------------------------------------------------------------------------------------------------------------------------------------|-----------------------------------------------------------------------------------------------------------|-------------------------------------------------------------------------------------------------------------------------------------------------------------------|--------------------------------------------------------------------------------------------------------------------------------------------------------|---------------------------------------------------------------------------------------------|------------------------------------------------------------------------------|-------------------------------------------------------------------------------------------------------------------------------------------------------------|
|                                         |                                                                                                                                                                                                                        |                                                                                                                                                                                 |                                                                                                           |                                                                                                                                                                   | potential low risk.                                                                                                                                    |                                                                                             |                                                                              | of the model was done.                                                                                                                                      |
| Ranson 2014 <sup>51</sup>               | Low<br><br>The study used daily temperature data from Global Historical Climatology Network Daily (GHCN-Daily) weather data from the National Climatic Data Center. Also, the validation of the exposure is mentioned. | Probably low<br><br>Outcome data are based on monthly outcome from Uniform Crime Reporting (UCR) data. Also, the validation of the outcome is mentioned.                        | Probably low<br><br>The study controlled for some primary confounders (time trend) and other confounders. | Low<br><br>The outcome data covers the law enforcement agencies representing 97.4% of the US population. Figure 1 shows the crime rate and temperature across US. | Low<br><br>The outcome dataset is highly represented and weighted average was used for missing values.                                                 | Low<br><br>Focused on murder, manslaughter, rape, and other crimes, which was all reported. | Probably high<br><br>No declaration of potential conflict of interest found. | Low<br><br>Poisson regression model was conducted, and the robustness of the model was done.                                                                |
| Reeping and Hemenway 2020 <sup>52</sup> | Probably high<br><br>The study used daily temperature data from Weather Underground. Also, there is no validation of the exposure is mentioned.                                                                        | Probably high<br><br>Outcome data are based on daily outcome from Chicago Tribune website, which is media-based data. Also, there is no validation of the outcome is mentioned. | Probably high<br><br>The study controlled no primary confounders but controlled for other confounders.    | Probably low<br><br>Shooting incident from the media was included, however, Figure 2 indicating the temperature and shooting, it was evenly distributed.          | Probably low<br><br>No sufficient information to evaluate the completeness of the outcome data, but the large sample size suggests potential low risk. | Low<br><br>Focused on shooting incident, which was all reported.                            | Low<br><br>Declared no competing financial interests.                        | Probably low<br><br>Regression analysis was conducted. However, no tests or sensitivity analysis for checking the appropriateness of the model is reported. |
| Rotton and Cohn 2000 <sup>53</sup>      | Probably low<br><br>The study used 3-hour interval temperature data                                                                                                                                                    | Probably low<br><br>Outcome data are based on daily calls from the Dallas                                                                                                       | Low<br><br>The study controlled for all primary                                                           | Low<br><br>Figure 4 shows the assault and temperature,                                                                                                            | Low<br><br>The missing dataset was                                                                                                                     | Low<br><br>Focused on the aggravated                                                        | Probably high<br><br>No declaration                                          | Probably low<br><br>Regression analysis was conducted.                                                                                                      |

|                                      |                                                                                                                                                                                 |                                                                                                                                                                                                            |                                                                                                                                |                                                                                         |                                                                                                                                                        |                                                                                    |                                                                              |                                                                                                                                                             |
|--------------------------------------|---------------------------------------------------------------------------------------------------------------------------------------------------------------------------------|------------------------------------------------------------------------------------------------------------------------------------------------------------------------------------------------------------|--------------------------------------------------------------------------------------------------------------------------------|-----------------------------------------------------------------------------------------|--------------------------------------------------------------------------------------------------------------------------------------------------------|------------------------------------------------------------------------------------|------------------------------------------------------------------------------|-------------------------------------------------------------------------------------------------------------------------------------------------------------|
|                                      | from National Climatic Data Center. However, no quality control of the temperature data is reported.                                                                            | police department. However, the study does not provide quality assurance of the outcome data.                                                                                                              | confounders (time trend and seasonality) and considered different confounders.                                                 | which is evenly distributed.                                                            | 0.06% of the series.                                                                                                                                   | assault police calls, which was all reported.                                      | of potential conflict of interest found.                                     | However, no tests or sensitivity analysis for checking the appropriateness of the model is reported.                                                        |
| Rotton and Cohn 2000b <sup>54</sup>  | Probably low<br><br>The study used 3-hour interval temperature data from National Climatic Data Center. However, no quality control of the temperature data is reported.        | Probably low<br><br>Outcome data are based on daily calls from the Dallas police department. However, the study does not provide quality assurance of the outcome data.                                    | Low<br><br>The study controlled for all primary confounders (time trend and seasonality) and considered different confounders. | Low<br><br>Figure 2 shows the assault and temperature, which is evenly distributed.     | Low<br><br>The missing dataset was replaced with linear interpolation.                                                                                 | Low<br><br>Focused on the aggravated assault police calls, which was all reported. | Probably high<br><br>No declaration of potential conflict of interest found. | Probably low<br><br>Regression analysis was conducted. However, no tests or sensitivity analysis for checking the appropriateness of the model is reported. |
| Ruderman and Cohn 2021 <sup>55</sup> | Probably low<br><br>The study used daily temperature data from National Centers for Environmental Information. However, no quality control of the temperature data is reported. | Probably low<br><br>Outcome data are based on daily Multiple-Victim Shooting (MVS) dataset from the Gun Violence Archive (GVA). However, the study does not provide quality assurance of the outcome data. | Low<br><br>The study controlled for all primary confounders (time trend and seasonality) and considered different confounders. | Low<br><br>Figure 2 shows the rate of MVS and temperature, which is evenly distributed. | Probably low<br><br>No sufficient information to evaluate the completeness of the outcome data, but the large sample size suggests potential low risk. | Low<br><br>Focused on shooting incident, which was all reported.                   | Low<br><br>Declared no competing financial interests.                        | Probably low<br><br>Regression analysis was conducted. However, no tests or sensitivity analysis for checking the appropriateness of the model is reported. |

|                                                 |                                                                                                                                                                                     |                                                                                                                                                                                                                                                     |                                                                                                                                |                                                                                        |                                                                                                                                                        |                                                                                                                                 |                                                                      |                                                                                                                                                             |
|-------------------------------------------------|-------------------------------------------------------------------------------------------------------------------------------------------------------------------------------------|-----------------------------------------------------------------------------------------------------------------------------------------------------------------------------------------------------------------------------------------------------|--------------------------------------------------------------------------------------------------------------------------------|----------------------------------------------------------------------------------------|--------------------------------------------------------------------------------------------------------------------------------------------------------|---------------------------------------------------------------------------------------------------------------------------------|----------------------------------------------------------------------|-------------------------------------------------------------------------------------------------------------------------------------------------------------|
| Sanz-Barbero, Linares et al. 2018 <sup>56</sup> | Probably low<br><br>The study used daily temperature data from State Meteorological Agency. However, no quality control of the temperature data is reported.                        | Probably low<br><br>Outcome data are based on daily calls to the Intimate Partner Violence (IPV) telephone help line from the Government Delegation for Gender Violence. However, the study does not provide quality assurance of the outcome data. | Probably low<br><br>The study controlled for some primary confounders (time trend) and other confounders.                      | Probably high<br><br>The phone calls from the Community of Madrid were included.       | Probably low<br><br>No sufficient information to evaluate the completeness of the outcome data, but the large sample size suggests potential low risk. | Low<br><br>Focused on shooting incident, which was all reported.                                                                | Low<br><br>Declared no competing financial interests.                | Probably low<br><br>Regression analysis was conducted. However, no tests or sensitivity analysis for checking the appropriateness of the model is reported. |
| Schinasi and Hamra 2017 <sup>57</sup>           | Probably low<br><br>The study used daily temperature data from the National Centers for Environmental Information. However, no quality control of the temperature data is reported. | Probably low<br><br>Outcome data are based on daily crime data from Philadelphia Police Department. However, the study does not provide quality assurance of the outcome data.                                                                      | Low<br><br>The study controlled for all primary confounders (time trend and seasonality) and considered different confounders. | Probably low<br><br>The study included outcomes from Philadelphia.                     | Probably low<br><br>No sufficient information to evaluate the completeness of the outcome data, but the large sample size suggests potential low risk. | Probably low<br><br>All the outcomes that the study pre-specified in the abstract and methods sections are explicitly reported. | Probably low<br><br>Declared no known competing financial interests. | Low<br><br>Regression model was conducted, and the robustness of the model was done.                                                                        |
| Schutte and Breetzke 2018 <sup>58</sup>         | Probably low<br><br>The study used daily temperature data from the e South African Weather Service. However, no quality control of                                                  | Probably low<br><br>Outcome data are based on daily South African Police Services (SAPS). However, the study does not provide quality                                                                                                               | Probably high<br><br>The analysis of variance (ANOVA) and spatial point pattern test was used.                                 | Probably high<br><br>The study included for the top high and top low temperature days. | Probably low<br><br>No sufficient information to evaluate the completeness of the outcome data, but the large sample                                   | Low<br><br>Focused on violent, property, and sexual crime, which was all reported.                                              | Low<br><br>Declared no competing financial interests.                | Probably high<br><br>The main analysis is done using the ANOVA and spatial point pattern test, and no                                                       |

|                                             |                                                                                                                                                                       |                                                                                                                                                                                                                 |                                                                                                        |                                                                                                            |                                                                                                                                                        |                                                                                                                                 |                                                                              |                                                                                                                                                             |
|---------------------------------------------|-----------------------------------------------------------------------------------------------------------------------------------------------------------------------|-----------------------------------------------------------------------------------------------------------------------------------------------------------------------------------------------------------------|--------------------------------------------------------------------------------------------------------|------------------------------------------------------------------------------------------------------------|--------------------------------------------------------------------------------------------------------------------------------------------------------|---------------------------------------------------------------------------------------------------------------------------------|------------------------------------------------------------------------------|-------------------------------------------------------------------------------------------------------------------------------------------------------------|
|                                             | the temperature data is reported.                                                                                                                                     | assurance of the outcome data.                                                                                                                                                                                  |                                                                                                        |                                                                                                            | size suggests potential low risk.                                                                                                                      |                                                                                                                                 |                                                                              | sensitivity analysis was done.                                                                                                                              |
| Schutte, Breetzke et al. 2021 <sup>59</sup> | Probably low<br><br>The study used daily temperature data from the South African Weather Service. However, no quality control of the temperature data is reported.    | Probably low<br><br>Outcome data are based on daily South African Police Services (SAPS). However, the study does not provide quality assurance of the outcome data.                                            | Probably high<br><br>The study controlled no primary confounders but controlled for other confounders. | Probably low<br><br>The study included outcomes from Nyanga and Manenberg.                                 | Probably low<br><br>No sufficient information to evaluate the completeness of the outcome data, but the large sample size suggests potential low risk. | Probably low<br><br>All the outcomes that the study pre-specified in the abstract and methods sections are explicitly reported. | Probably high<br><br>No declaration of potential conflict of interest found. | Probably low<br><br>Regression analysis was conducted. However, no tests or sensitivity analysis for checking the appropriateness of the model is reported. |
| Shen, Hu et al. 2020 <sup>60</sup>          | Probably high<br><br>The study used daily temperature data from rp5 website, which is not validated. However, no quality control of the temperature data is reported. | Probably low<br><br>Outcome data are based on daily crime statistics were provided by the Municipal Public Safety Bureau of Beijing. However, the study does not provide quality assurance of the outcome data. | Probably high<br><br>The long-term trend analysis and noise analysis was used.                         | Low<br><br>Figure A1 and A2 indicates the crime and temperature distribution, which is evenly distributed. | Probably low<br><br>No sufficient information to evaluate the completeness of the outcome data, but the large sample size suggests potential low risk. | Probably low<br><br>All the outcomes that the study pre-specified in the abstract and methods sections are explicitly reported. | Probably low<br><br>Declared no known competing financial interests.         | Probably high<br><br>The main analysis is done using the long-term trend analysis and noise analysis, and no sensitivity analysis was done.                 |
| Sommer, Lee et al. 2018 <sup>61</sup>       | Probably low<br><br>The study used daily temperature data from Climate Data Online                                                                                    | Probably low<br><br>Outcome data are based on daily crime incident from Boston Police                                                                                                                           | Probably low<br><br>The study controlled for some primary confounders                                  | Probably low<br><br>The study included outcomes from Boston.                                               | Probably low<br><br>No sufficient information to evaluate the completeness                                                                             | Probably high<br><br>Among the various violent                                                                                  | Probably low<br><br>Declared no known competing                              | Probably low<br><br>Causal analysis was conducted, and some sensitivity                                                                                     |

|                                                   |                                                                                                                                                                                                            |                                                                                                                                                                      |                                                                                                           |                                                                        |                                                                                                                                                        |                                                                         |                                                                              |                                                                                                                                                                           |
|---------------------------------------------------|------------------------------------------------------------------------------------------------------------------------------------------------------------------------------------------------------------|----------------------------------------------------------------------------------------------------------------------------------------------------------------------|-----------------------------------------------------------------------------------------------------------|------------------------------------------------------------------------|--------------------------------------------------------------------------------------------------------------------------------------------------------|-------------------------------------------------------------------------|------------------------------------------------------------------------------|---------------------------------------------------------------------------------------------------------------------------------------------------------------------------|
|                                                   | provided by the National Oceanic and Atmospheric Administration. However, no quality control of the temperature data is reported.                                                                          | Department. However, the study does not provide quality assurance of the outcome data.                                                                               | (seasonality) and other confounders.                                                                      |                                                                        | of the outcome data, but the large sample size suggests potential low risk.                                                                            | crimes, the study focused on the aggravated assault and larceny counts. | financial interests.                                                         | analysis was reported.                                                                                                                                                    |
| Sorg and Taylor 2011 <sup>62</sup>                | Probably high<br><br>The study used monthly temperature data from Weather Underground. Also, there is no validation of the exposure is mentioned.                                                          | Probably high<br><br>Outcome data are based on monthly street robbery from Philadelphia police department. Also, there is no validation of the outcome is mentioned. | Probably low<br><br>The study controlled for some primary confounders (time trend) and other confounders. | Probably low<br><br>The study included outcomes from Philadelphia.     | Probably low<br><br>No sufficient information to evaluate the completeness of the outcome data, but the large sample size suggests potential low risk. | Low<br><br>Focused on street robbery, which was all reported.           | Probably high<br><br>No declaration of potential conflict of interest found. | Probably low<br><br>Various multilevel model analysis was conducted. However, no tests or sensitivity analysis for checking the appropriateness of the model is reported. |
| Stechemesser, Levermann et al. 2022 <sup>63</sup> | Probably low<br><br>The study used daily temperature data from the fifth generation European Centre for Medium-Range Weather Forecasts global climate and weather reanalysis dataset. However, there is no | Probably low<br><br>Outcome data are based on machine learning approach to identify hate from the daily tweets. Also, the validation of the outcome is mentioned.    | Probably low<br><br>The study controlled for some primary confounders (time trend) and other confounders. | Probably high<br><br>The study has sampled from the 1% Twitter stream. | Probably low<br><br>No sufficient information to evaluate the completeness of the outcome data, but the large sample size suggests potential low risk. | Low<br><br>Focused on number of hate tweets, which was all reported.    | Probably low<br><br>Declared no known competing financial interests.         | Probably low<br><br>Fixed-effects panel-regression model analysis was conducted. However, no tests or sensitivity analysis for checking the appropriateness               |



|                                           |                                                                                                                                                                                        |                                                                                                                                                                                |                                                                                                           |                                                                                       |                                                                                                                                                        |                                                                                                       |                                                                              |                                                                                                                                                                               |
|-------------------------------------------|----------------------------------------------------------------------------------------------------------------------------------------------------------------------------------------|--------------------------------------------------------------------------------------------------------------------------------------------------------------------------------|-----------------------------------------------------------------------------------------------------------|---------------------------------------------------------------------------------------|--------------------------------------------------------------------------------------------------------------------------------------------------------|-------------------------------------------------------------------------------------------------------|------------------------------------------------------------------------------|-------------------------------------------------------------------------------------------------------------------------------------------------------------------------------|
|                                           | validation of the exposure is mentioned.                                                                                                                                               |                                                                                                                                                                                |                                                                                                           |                                                                                       |                                                                                                                                                        |                                                                                                       |                                                                              | of the model is reported.                                                                                                                                                     |
| Stevens, Beggs et al. 2019 <sup>64</sup>  | Probably low<br><br>The study used daily temperature data from Australian Water Availability Project (AWAP). However, there is no validation of the exposure is mentioned.             | Probably low<br><br>Outcome data are from New South Wales Department of Justice, Bureau of Crime Statistics and Research. However, the validation of the outcome is mentioned. | Probably low<br><br>The study controlled for some primary confounders (time trend) and other confounders. | Low<br><br>Figure 3 and Figure 4 represents the temperature and outcome distribution. | Probably low<br><br>No sufficient information to evaluate the completeness of the outcome data, but the large sample size suggests potential low risk. | Low<br><br>Focused on assault, theft, and fraud, which was all reported.                              | Probably high<br><br>No declaration of potential conflict of interest found. | Probably low<br><br>Linear regression model analysis was conducted. However, no tests or sensitivity analysis for checking the appropriateness of the model is reported.      |
| Stevens, Graham et al. 2021 <sup>65</sup> | Probably low<br><br>The study used daily gridded temperature data from the Australian Water Availability Project (AWAP). However, there is no validation of the exposure is mentioned. | Probably low<br><br>Outcome data are based on “We Feel” tool to identify hate from the daily tweets and assaults from New South Wales (NSW) Department of Justice.             | Probably low<br><br>The study controlled for some primary confounders (time trend) and other confounders. | Probably high<br><br>Only the English tweets were selected.                           | Probably low<br><br>No sufficient information to evaluate the completeness of the outcome data, but the large sample size suggests potential low risk. | Probably high<br><br>The 10 highest and lowest angry tweet count days were selected for the analysis. | Low<br><br>Declared no competing financial interests.                        | Probably low<br><br>Negative binomial regression analysis was conducted. However, no tests or sensitivity analysis for checking the appropriateness of the model is reported. |
| Stevens, Graham et al. 2023 <sup>66</sup> | Probably low<br><br>The study used daily temperature                                                                                                                                   | Probably low<br><br>Outcome data are from New South                                                                                                                            | Probably low<br><br>The study controlled for                                                              | Probably low<br><br>The study included                                                | Probably low<br><br>No sufficient information to                                                                                                       | Probably low<br><br>All the outcomes that                                                             | Low<br><br>Declared no                                                       | Probably low<br><br>Negative binomial                                                                                                                                         |

|                                           |                                                                                                                                                        |                                                                                                                                            |                                                                                               |                                                                                                                                                                                                                                                   |                                                                                                                                                        |                                                                                                                                 |                                                               |                                                                                                                                         |
|-------------------------------------------|--------------------------------------------------------------------------------------------------------------------------------------------------------|--------------------------------------------------------------------------------------------------------------------------------------------|-----------------------------------------------------------------------------------------------|---------------------------------------------------------------------------------------------------------------------------------------------------------------------------------------------------------------------------------------------------|--------------------------------------------------------------------------------------------------------------------------------------------------------|---------------------------------------------------------------------------------------------------------------------------------|---------------------------------------------------------------|-----------------------------------------------------------------------------------------------------------------------------------------|
|                                           | data from Australian Water Availability Project (AWAP). However, there is no validation of the exposure is mentioned.                                  | Wales Department of Justice, Bureau of Crime Statistics and Research. However, the validation of the outcome is mentioned.                 | some primary confounders (time trend) and other confounders.                                  | outcomes from New South Wales.                                                                                                                                                                                                                    | evaluate the completeness of the outcome data, but the large sample size suggests potential low risk.                                                  | the study pre-specified in the abstract and methods sections are explicitly reported.                                           | competing financial interests.                                | regression analysis was conducted. However, no tests or sensitivity analysis for checking the appropriateness of the model is reported. |
| Takahashi 2017 <sup>67</sup>              | Probably low<br><br>The study used mean temperature from Japan Meteorological Agency. However, no quality control of the temperature data is reported. | Probably high<br><br>Outcome data are based on the monthly Statistics Bureau. However, no quality control of the outcome data is reported. | Probably low<br><br>The study did control for some primary confounders and other confounders. | Low<br><br>The annual crime/violence counts that are presented on Figure 1 show a reasonable distribution, hence providing evidence that inclusion of crime/violence in each time period is not based on any factor associated with the exposure. | Probably low<br><br>No sufficient information to evaluate the completeness of the outcome data, but the large sample size suggests potential low risk. | Probably low<br><br>All the outcomes that the study pre-specified in the abstract and methods sections are explicitly reported. | Low<br><br>Focused on violent crimes, which was all reported. | Probably low<br><br>Regression model was conducted. However, there is no sensitivity analysis.                                          |
| Talaei, Hedjazi et al. 2014 <sup>68</sup> | Probably low<br><br>The study used daily temperature data from Information Technology (IT)                                                             | Probably low<br><br>Outcome data are homicide, rage, and suicidal attempts from Legal Medicine                                             | Probably high<br><br>The study has used correlation, ANOVA, and post hoc analysis.            | Probably low<br><br>The study included outcomes from Mashhad.                                                                                                                                                                                     | Probably low<br><br>No sufficient information to evaluate the completeness of the outcome                                                              | Probably low<br><br>All the outcomes that the study pre-specified in the abstract                                               | Probably high<br><br>No declaration of potential              | Probably high<br><br>Regression analysis and sensitivity analysis should be conducted.                                                  |

|                                             |                                                                                                                                                                    |                                                                                                                                                                         |                                                                                                           |                                                                                       |                                                                                                                                                        |                                                               |                                                                              |                                                                                                                                                                                    |
|---------------------------------------------|--------------------------------------------------------------------------------------------------------------------------------------------------------------------|-------------------------------------------------------------------------------------------------------------------------------------------------------------------------|-----------------------------------------------------------------------------------------------------------|---------------------------------------------------------------------------------------|--------------------------------------------------------------------------------------------------------------------------------------------------------|---------------------------------------------------------------|------------------------------------------------------------------------------|------------------------------------------------------------------------------------------------------------------------------------------------------------------------------------|
|                                             | department of Iran Meteorological Organization. However, there is no validation of the exposure is mentioned.                                                      | Organization. However, the validation of the outcome is mentioned.                                                                                                      |                                                                                                           |                                                                                       | data, but the large sample size suggests potential low risk.                                                                                           | and methods sections are explicitly reported.                 | conflict of interest found                                                   |                                                                                                                                                                                    |
| Tiihonen, Halonen et al. 2017 <sup>69</sup> | Probably high<br><br>The study used monthly temperature data from Statistics Centre of Finland. Also, there is no validation of the exposure is mentioned.         | Probably low<br><br>Outcome data are from Finnish Meteorological Institute's measurement station, in a monthly basis. Also, the validation of the outcome is mentioned. | Probably high<br><br>The study did not control for primary confounders.                                   | Low<br><br>Figure 2 represents the temperature and violent crime distribution.        | Probably low<br><br>No sufficient information to evaluate the completeness of the outcome data, but the large sample size suggests potential low risk. | Low<br><br>Focused on violent crimes, which was all reported. | Low<br><br>Declared no competing financial interests.                        | Probably low<br><br>Random-effects Poisson regression analysis was conducted. However, no tests or sensitivity analysis for checking the appropriateness of the model is reported. |
| Tol and Wagner 2010 <sup>70</sup>           | Probably high<br><br>The study used annual gridded temperature data from the NOAA paleoclimate webpage. Also, there is no validation of the exposure is mentioned. | Probably high<br><br>Outcome data are based on annual conflicts from Uppsala Conflict Data. Also, there is no validation of the outcome is mentioned.                   | Probably low<br><br>The study controlled for some primary confounders (time trend) and other confounders. | Low<br><br>Figure 2 represents the correlation between temperature and war conflicts. | Probably low<br><br>No sufficient information to evaluate the completeness of the outcome data, but the large sample size suggests potential low risk. | Low<br><br>Focused on war conflicts, which was all reported.  | Probably high<br><br>No declaration of potential conflict of interest found. | Probably low<br><br>Regression model analysis was conducted. However, no tests or sensitivity analysis for checking the appropriateness of the model is reported.                  |

|                                                   |                                                                                                                                                                                                               |                                                                                                                                                                                    |                                                                                                           |                                                                                               |                                                                                                                                                        |                                                                                                                                 |                                                                              |                                                                                                                                                                   |
|---------------------------------------------------|---------------------------------------------------------------------------------------------------------------------------------------------------------------------------------------------------------------|------------------------------------------------------------------------------------------------------------------------------------------------------------------------------------|-----------------------------------------------------------------------------------------------------------|-----------------------------------------------------------------------------------------------|--------------------------------------------------------------------------------------------------------------------------------------------------------|---------------------------------------------------------------------------------------------------------------------------------|------------------------------------------------------------------------------|-------------------------------------------------------------------------------------------------------------------------------------------------------------------|
| Towers, Chen et al. 2018 <sup>71</sup>            | Probably low<br><br>The study used daily temperature data from Weather Underground website. However, there is no validation of the exposure is mentioned.                                                     | Probably low<br><br>Outcome data are from Chicago Police Department's CLEAR (Citizen Law Enforcement Analysis and Reporting). However, the validation of the outcome is mentioned. | Probably low<br><br>The study controlled for some primary confounders (time trend) and other confounders. | Probably low<br><br>The study included outcomes from Chicago.                                 | Probably low<br><br>No sufficient information to evaluate the completeness of the outcome data, but the large sample size suggests potential low risk. | Probably low<br><br>All the outcomes that the study pre-specified in the abstract and methods sections are explicitly reported. | Probably high<br><br>No declaration of potential conflict of interest found. | Probably low<br><br>Regression model analysis was conducted. However, no tests or sensitivity analysis for checking the appropriateness of the model is reported. |
| Trujillo and Howley 2021 <sup>72</sup>            | Probably low<br><br>The study used daily temperature data from Colombian Institute of Hydrology, Meteorology and Environmental Studies (IDEAM). However, there is no validation of the exposure is mentioned. | Probably low<br><br>Outcome data are from Legal Medicine and Forensic Studies (INMLCF). However, the validation of the outcome is mentioned.                                       | Probably low<br><br>The study controlled for some primary confounders (time trend) and other confounders. | Low<br><br>Figure 1 shows the distribution of homicide and temperature is evenly distributed. | Low<br><br>The study's missing dataset was 1.76% for the exposure dataset.                                                                             | Low<br><br>Focused on homicide and interpersonal violence, which was all reported.                                              | Probably low<br><br>Declared no known competing financial interests.         | Low<br><br>Regression model was conducted, and the robustness of the model was done.                                                                              |
| van de Vliert, Schwartz et al. 1999 <sup>73</sup> | Probably high<br><br>The study used annual temperature data from National                                                                                                                                     | Probably high<br><br>Outcome data are from annual political violence from World                                                                                                    | Probably high<br><br>The study did not control for all primary confounders.                               | Probably high<br><br>The countries included were based on records of political                | Probably low<br><br>No sufficient information to evaluate the completeness                                                                             | Probably low<br><br>All the outcomes that the study pre-specified in                                                            | Probably low<br><br>Declared no known competing                              | Probably high<br><br>The main analysis was correlation and hierarchical                                                                                           |

|                                     |                                                                                                                                                                                                       |                                                                                                                                                                                                                |                                                                                                           |                                                                      |                                                                                                                                                        |                                                                                                                                 |                                                                      |                                                                                                   |
|-------------------------------------|-------------------------------------------------------------------------------------------------------------------------------------------------------------------------------------------------------|----------------------------------------------------------------------------------------------------------------------------------------------------------------------------------------------------------------|-----------------------------------------------------------------------------------------------------------|----------------------------------------------------------------------|--------------------------------------------------------------------------------------------------------------------------------------------------------|---------------------------------------------------------------------------------------------------------------------------------|----------------------------------------------------------------------|---------------------------------------------------------------------------------------------------|
|                                     | Geographic Atlas of the World. Also, there is no validation of the exposure is mentioned.                                                                                                             | Handbook of Political and Social Indicators. Also, the validation of the outcome is mentioned.                                                                                                                 |                                                                                                           | violence from the World Handbook of Political and Social Indicators. | of the outcome data, but the large sample size suggests potential low risk.                                                                            | the abstract and methods sections are explicitly reported.                                                                      | financial interests.                                                 | regression, and no sensitivity analysis was conducted.                                            |
| van Weezel 2020 <sup>74</sup>       | Probably low<br><br>The study aggregated monthly temperature to annual temperature data from Berkeley Earth Surface Temperature (BEST) dataset. However, the validation of the exposure is mentioned. | Probably high<br><br>Outcome data are from annual conflict from Georeferenced Event Dataset (GED, version 18.1) from the Uppsala Conflict Data Programme. However, the validation of the outcome is mentioned. | Probably high<br><br>The study did not control for all primary confounders.                               | Probably low<br><br>The study included outcomes from Africa.         | Probably low<br><br>No sufficient information to evaluate the completeness of the outcome data, but the large sample size suggests potential low risk. | Probably low<br><br>All the outcomes that the study pre-specified in the abstract and methods sections are explicitly reported. | Low<br><br>Declared no competing financial interests.                | Probably low<br><br>Various analysis and robustness check was conducted.                          |
| Wei, Shao et al. 2022 <sup>75</sup> | Probably high<br><br>The study used annual temperature data from World Bank. Also, there is no validation of the exposure is mentioned.                                                               | Probably high<br><br>Outcome data are from annual homicide from the World Bank. Also, there is no validation of the outcome is mentioned.                                                                      | Probably low<br><br>The study controlled for some primary confounders (time trend) and other confounders. | Probably low<br><br>The study included outcomes from 171 countries.  | Probably low<br><br>No sufficient information to evaluate the completeness of the outcome data, but the large sample size suggests potential low risk. | Low<br><br>The study focused on the natural hazard and homicide.                                                                | Probably low<br><br>Declared no known competing financial interests. | Low<br><br>Fixed-effect regression model was conducted, and the robustness of the model was done. |
| Wesselbaum 2022 <sup>76</sup>       | Probably low                                                                                                                                                                                          | Probably low                                                                                                                                                                                                   | Probably low                                                                                              | Low                                                                  | Probably low                                                                                                                                           | Probably low                                                                                                                    | Low                                                                  | Probably low                                                                                      |

|                                                   |                                                                                                                                                      |                                                                                                                                                     |                                                                                                           |                                                                                 |                                                                                                                                                        |                                                                                                                                 |                                                       |                                                                                                                                                                              |
|---------------------------------------------------|------------------------------------------------------------------------------------------------------------------------------------------------------|-----------------------------------------------------------------------------------------------------------------------------------------------------|-----------------------------------------------------------------------------------------------------------|---------------------------------------------------------------------------------|--------------------------------------------------------------------------------------------------------------------------------------------------------|---------------------------------------------------------------------------------------------------------------------------------|-------------------------------------------------------|------------------------------------------------------------------------------------------------------------------------------------------------------------------------------|
|                                                   | The study used daily temperature data from NOAA's Local Climatological Data set (LCD). However, there is no validation of the exposure is mentioned. | Outcome data are from New York City OpenData platform in the historic NYPD Complaint data set. However, the validation of the outcome is mentioned. | The study controlled for some primary confounders (time trend) and other confounders.                     | Figure 2 indicating the temperature and violent crimes were evenly distributed. | No sufficient information to evaluate the completeness of the outcome data, but the large sample size suggests potential low risk.                     | All the outcomes that the study pre-specified in the abstract and methods sections are explicitly reported.                     | Declared no competing financial interests.            | Regression model analysis was conducted. However, no tests or sensitivity analysis for checking the appropriateness of the model is reported.                                |
| Williams, McDonogh-Wong et al. 2020 <sup>77</sup> | Probably low<br><br>The study used daily temperature data from NOAA. However, there is no validation of the exposure is mentioned.                   | Probably low<br><br>Outcome data are from public database and city agencies. However, the validation of the outcome is mentioned.                   | Low<br><br>The study controlled for all primary confounders and other confounders.                        | Probably low<br><br>The study included outcomes from 23 cities from US.         | Probably low<br><br>No sufficient information to evaluate the completeness of the outcome data, but the large sample size suggests potential low risk. | Probably low<br><br>All the outcomes that the study pre-specified in the abstract and methods sections are explicitly reported. | Low<br><br>Declared no competing financial interests. | Probably low<br><br>Generalized additives model analysis was conducted. However, no tests or sensitivity analysis for checking the appropriateness of the model is reported. |
| Williams, Allen et al. 2020 <sup>78</sup>         | Probably low<br><br>The study used daily temperature data from Boston Logan International Airport. However, there is no validation of the            | Probably low<br><br>Outcome data are from Boston Police Department. However, the validation of the outcome is mentioned.                            | Probably low<br><br>The study controlled for some primary confounders (time trend) and other confounders. | Probably low<br><br>The study included outcomes from Boston.                    | Probably low<br><br>No sufficient information to evaluate the completeness of the outcome data, but the large sample size suggests                     | Probably low<br><br>All the outcomes that the study pre-specified in the abstract and methods sections are explicitly reported. | Low<br><br>Declared no competing financial interests. | Probably low<br><br>Regression analysis was conducted. However, no tests or sensitivity analysis for checking the appropriateness                                            |

|                                          | exposure is mentioned.                                                                                                                                                                                    |                                                                                                                               |                                                                                                           |                                                                                    | potential low risk.                                                                                                                                    |                                                                                                                                 |                                                                              | of the model is reported.                                                                                                                                      |
|------------------------------------------|-----------------------------------------------------------------------------------------------------------------------------------------------------------------------------------------------------------|-------------------------------------------------------------------------------------------------------------------------------|-----------------------------------------------------------------------------------------------------------|------------------------------------------------------------------------------------|--------------------------------------------------------------------------------------------------------------------------------------------------------|---------------------------------------------------------------------------------------------------------------------------------|------------------------------------------------------------------------------|----------------------------------------------------------------------------------------------------------------------------------------------------------------|
| Williams, Hill et al. 2015 <sup>79</sup> | Low<br><br>The study used daily temperature data from National Institute of Water and Atmospheric Research (NIWA n.d.). Also, the missing dataset was mentioned.                                          | Low<br><br>Outcome data are from New Zealand Police. Also the details of the outcome is mentioned in the Supplementary files. | Probably low<br><br>The study controlled for some primary confounders (time trend) and other confounders. | Low<br><br>Figure 1 indicated the temperature and assaults are evenly distributed. | Probably low<br><br>No sufficient information to evaluate the completeness of the outcome data, but the large sample size suggests potential low risk. | Probably low<br><br>All the outcomes that the study pre-specified in the abstract and methods sections are explicitly reported. | Probably high<br><br>No declaration of potential conflict of interest found. | Low<br><br>Regression model was conducted, and the sensitivity analysis was done.                                                                              |
| Wu, Lee et al. 2020 <sup>80</sup>        | Probably low<br><br>The study used temperature data from National Climatic Data Center and National Oceanic and Atmospheric Administration. However, there is no validation of the exposure is mentioned. | Probably low<br><br>Outcome data are from United States Federal Bureau of Investigation (FBI) Uniform Crime Reporting (UCR).  | High<br><br>The study conducted the multiple linear regression with no confounders.                       | Low<br><br>Figure 2 indicated the temperature and outcome are evenly distributed.  | Probably low<br><br>No sufficient information to evaluate the completeness of the outcome data, but the large sample size suggests potential low risk. | Probably low<br><br>All the outcomes that the study pre-specified in the abstract and methods sections are explicitly reported. | Low<br><br>Declared no competing financial interests.                        | Probably high<br><br>The study's main analysis was multiple linear regression analysis and wavelet coherence analysis. Also, no sensitivity analysis was done. |
| Xu, Xiong et al. 2020 <sup>81</sup>      | Low<br><br>The study used daily gridded temperature data from Parameter–Elevation                                                                                                                         | Low<br><br>Outcome data are from Crime Open Database (CODE) and the details of                                                | Low<br><br>The study controlled for all primary confounders and                                           | Probably low<br><br>The study included outcomes for large US cities.               | Probably low<br><br>No sufficient information to evaluate the completeness of the outcome                                                              | Probably low<br><br>All the outcomes that the study pre-specified in the abstract                                               | Low<br><br>Declared no competing financial interests.                        | Low<br><br>Case-crossover analysis was conducted. Also, the sensitivity                                                                                        |

|                                                  |                                                                                                                                                      |                                                                                                                                          |                                                                                                           |                                                              |                                                                                                                                                        |                                                                                                                                 |                                                                              |                                                                                                                                                                                       |
|--------------------------------------------------|------------------------------------------------------------------------------------------------------------------------------------------------------|------------------------------------------------------------------------------------------------------------------------------------------|-----------------------------------------------------------------------------------------------------------|--------------------------------------------------------------|--------------------------------------------------------------------------------------------------------------------------------------------------------|---------------------------------------------------------------------------------------------------------------------------------|------------------------------------------------------------------------------|---------------------------------------------------------------------------------------------------------------------------------------------------------------------------------------|
|                                                  | Regressions on Independent Slopes Model (PRISM). Also, the validation of the exposure is mentioned.                                                  | the dataset was provided.                                                                                                                | other confounders.                                                                                        |                                                              | data, but the large sample size suggests potential low risk.                                                                                           | and methods sections are explicitly reported.                                                                                   |                                                                              | analysis for checking the appropriateness of the model is reported.                                                                                                                   |
| Yiannakoulias and Kielasinska 2016 <sup>82</sup> | Probably low<br><br>The study used daily temperature data from Environment Canada. However, there is no validation of the exposure is mentioned.     | Probably low<br><br>Outcome data are from Ontario Office of the Fire Marshal (OFM). However, the validation of the outcome is mentioned. | Probably low<br><br>The study controlled for some primary confounders (time trend) and other confounders. | Probably low<br><br>The study included outcomes for Toronto. | Probably low<br><br>No sufficient information to evaluate the completeness of the outcome data, but the large sample size suggests potential low risk. | Low<br><br>Focused on arson, which is reported.                                                                                 | Low<br><br>Declared no competing financial interests.                        | Probably low<br><br>Poisson generalized linear mixed model (GLMM) was conducted. However, no tests or sensitivity analysis for checking the appropriateness of the model is reported. |
| Yu, Mu et al. 2017 <sup>83</sup>                 | Probably low<br><br>The study used daily temperature data from Central Weather Bureau. However, there is no validation of the exposure is mentioned. | Probably low<br><br>Outcome data are from National Police Agency. However, the validation of the outcome is mentioned.                   | Probably low<br><br>The study controlled for some primary confounders (time trend) and other confounders. | Probably low<br><br>The study included outcomes for Taiwan.  | Probably low<br><br>No sufficient information to evaluate the completeness of the outcome data, but the large sample size suggests potential low risk. | Probably low<br><br>All the outcomes that the study pre-specified in the abstract and methods sections are explicitly reported. | Probably high<br><br>No declaration of potential conflict of interest found. | Low<br><br>Negative binomial regression analysis was conducted. Also, the sensitivity analysis for checking the robustness of                                                         |



|                                   |                                                                                                                                  |                                                                                                                                                                                                        |                                                                                                           |                                                                      |                                                                                                                                                        |                                                                                 |                                                                      |                                                                                                                                                                         |
|-----------------------------------|----------------------------------------------------------------------------------------------------------------------------------|--------------------------------------------------------------------------------------------------------------------------------------------------------------------------------------------------------|-----------------------------------------------------------------------------------------------------------|----------------------------------------------------------------------|--------------------------------------------------------------------------------------------------------------------------------------------------------|---------------------------------------------------------------------------------|----------------------------------------------------------------------|-------------------------------------------------------------------------------------------------------------------------------------------------------------------------|
|                                   |                                                                                                                                  |                                                                                                                                                                                                        |                                                                                                           |                                                                      |                                                                                                                                                        |                                                                                 |                                                                      | the model is reported.                                                                                                                                                  |
| Zhu, He et al. 2023 <sup>84</sup> | Probably low<br><br>The study used daily gridded temperature data. However, there is no validation of the exposure is mentioned. | Probably high<br><br>Outcome data are from Demographic and Health Surveys (DHS). It was based on interview questions, which could have biased results in collecting Intimate Partner Violence dataset. | Probably low<br><br>The study controlled for some primary confounders (time trend) and other confounders. | Probably high<br><br>The study included outcomes for only the women. | Probably low<br><br>No sufficient information to evaluate the completeness of the outcome data, but the large sample size suggests potential low risk. | Low<br><br>Focused on the intimate partner violence, which was all represented. | Probably low<br><br>Declared no known competing financial interests. | Low<br><br>multivariable mixed-effects logistic regression analysis was conducted. Also, the sensitivity analysis for checking the robustness of the model is reported. |

**Table S8.** Summary of the studies included in meta-analysis and sensitivity analysis for systematic literature review of the association between temperature, crime and violence

| <b>Study</b>                                        | <b>Study region</b>                                                              | <b>Relative Risk<sup>a</sup> (95% CI)</b> | <b>Pooled Relative Risk<sup>b</sup> (95% CI)</b> |
|-----------------------------------------------------|----------------------------------------------------------------------------------|-------------------------------------------|--------------------------------------------------|
| <b>Short-term</b>                                   |                                                                                  |                                           |                                                  |
| <b>Violent crime</b>                                |                                                                                  |                                           |                                                  |
| Baryshnikova, Davidson et al. 2022 <sup>5</sup>     | 4 cities in USA                                                                  | 1.009 (1.007, 1.011)                      | 1.017 (1.002, 1.033)                             |
| Berman, Bayham et al. 2020 <sup>6</sup>             | 436 counties in USA                                                              | 1.013 (0.808, 1.218)                      | 1.015 (1.003, 1.028)                             |
| Cruz, D'Alessio et al. 2023 <sup>14</sup>           | Cleveland, Ohio, USA                                                             | 1.043 (1.026, 1.059)                      | 1.008 (1.006, 1.011)                             |
| Le, Berman et al. 2022 <sup>26</sup>                | Hanoi, Vietnam                                                                   | 1.104 (0.997, 1.211)                      | 1.009 (1.007, 1.011)                             |
| Michel, Wang et al. 2016 <sup>41</sup>              | Baltimore, Maryland, USA                                                         | 1.008 (1.006, 1.010)                      | 1.018 (1.002, 1.033)                             |
| Potgieter, Fabris-Rotelli et al. 2022 <sup>49</sup> | Developing township of Khayelitsha, in the Western Cape Province of South Africa | 1.021 (1.009, 1.033)                      | 1.009 (1.008, 1.011)                             |
| Wesselbaum 2022 <sup>76</sup>                       | New York, USA                                                                    | 0.993 (0.987, 1.000)                      | 1.011 (1.008, 1.013)                             |
| Yu, Mu et al. 2017 <sup>83</sup>                    | Taiwan                                                                           | 1.019 (1.012, 1.025)                      | 1.008 (1.006, 1.010)                             |
| <i>Overall</i>                                      | -                                                                                | 1.009 (1.007, 1.011)                      | -                                                |
| <b>Property crime</b>                               |                                                                                  |                                           |                                                  |
| Baryshnikova, Davidson et al. 2022 <sup>5</sup>     | 4 cities in USA                                                                  | 1.006 (1.004, 1.008)                      | 0.996 (0.980, 1.012)                             |
| Berman, Bayham et al. 2020 <sup>6</sup>             | 436 counties in USA                                                              | 1.006 (0.851, 1.161)                      | 0.998 (0.985, 1.011)                             |
| Le, Berman et al. 2022 <sup>26</sup>                | Hanoi, Vietnam                                                                   | 1.071 (1.005, 1.137)                      | 0.996 (0.984, 1.007)                             |
| Potgieter, Fabris-Rotelli et al. 2022 <sup>49</sup> | Developing township of Khayelitsha, in the Western Cape Province of South Africa | 0.978 (0.967, 0.988)                      | 1.003 (0.999, 1.007)                             |
| Yu, Mu et al. 2017 <sup>83</sup>                    | Taiwan                                                                           | 1.002 (1.000, 1.004)                      | 0.998 (0.979, 1.017)                             |
| <i>Overall</i>                                      | -                                                                                | 1.001 (0.997, 1.005)                      | -                                                |
| <b>Assault</b>                                      |                                                                                  |                                           |                                                  |
| Jung, Kim et al. 2020 <sup>23</sup>                 | Seoul, South Korea                                                               | 1.101 (1.092, 1.110)                      | 1.012 (1.004, 1.019)                             |
| Lemon and Partridge 2017 <sup>27</sup>              | Dorset, UK                                                                       | 1.010 (1.000, 1.020)                      | 1.022 (0.988, 1.056)                             |
| Mapou, Shendell et al. 2017 <sup>34</sup>           | Chicago, Houston, Philadelphia, and Seattle, USA                                 | 1.029 (1.015, 1.043)                      | 1.019 (0.984, 1.053)                             |
| Rotton and Cohn 2000 <sup>54</sup>                  | Dallas, Texas, USA                                                               | 1.028 (0.897, 1.160)                      | 1.020 (0.990, 1.051)                             |
| Stevens, Beggs et al. 2019 <sup>64</sup>            | New South Wales, Australia                                                       | 1.005 (1.005, 1.006)                      | 1.023 (0.989, 1.057)                             |
| Stevens, Graham et al. 2021 <sup>65</sup>           | New South Wales, Australia                                                       | 0.957 (0.901, 1.013)                      | 1.028 (0.999, 1.056)                             |
| Williams, Hill et al. 2015 <sup>79</sup>            | New Zealand                                                                      | 1.002 (0.974, 1.030)                      | 1.023 (0.990, 1.057)                             |
| Yu, Mu et al. 2017 <sup>83</sup>                    | Taiwan                                                                           | 1.015 (1.013, 1.017)                      | 1.021 (0.987, 1.056)                             |
| <i>Overall</i>                                      | -                                                                                | 1.021 (0.991, 1.050)                      | -                                                |

|                                               |                                                     |                      |                      |
|-----------------------------------------------|-----------------------------------------------------|----------------------|----------------------|
| <b>Homicide</b>                               |                                                     |                      |                      |
| Gates, Klein et al. 2019 <sup>18</sup>        | South Africa                                        | 1.021 (1.018, 1.024) | 1.006 (1.000, 1.013) |
|                                               | Chicago, Houston, Philadelphia,<br>and Seattle, USA | 1.034 (0.960, 1.107) | 1.011 (1.002, 1.020) |
| Mapou, Shendell et al. 2017 <sup>34</sup>     | Baltimore, Maryland, USA                            | 1.006 (0.998, 1.014) | 1.013 (1.002, 1.024) |
| Michel, Wang et al. 2016 <sup>41</sup>        | California, USA                                     | 1.009 (1.003, 1.015) | 1.012 (1.001, 1.024) |
| Rahman, Lorenzo et al. 2023 <sup>50</sup>     | Barranquilla, Colombia                              | 1.006 (0.980, 1.032) | 1.012 (1.002, 1.022) |
| Trujillo and Howley 2021 <sup>72</sup>        | New York, USA                                       | 1.000 (1.000, 1.000) | 1.014 (1.005, 1.023) |
| Wesselbaum 2022 <sup>76</sup>                 | 9 cities, USA                                       | 1.042 (1.011, 1.073) | 1.009 (1.001, 1.017) |
| Xu, Xiong et al. 2020 <sup>81</sup>           | -                                                   | 1.011 (1.002, 1.020) | -                    |
| <i>Overall</i>                                | -                                                   | -                    | -                    |
| <b>Long-term Homicide</b>                     |                                                     |                      |                      |
| Algahtany, Kumar et al. 2022 -a <sup>2</sup>  | Riyadh, Saudi Arabia                                | 1.013 (1.012, 1.013) | 1.037 (0.993, 1.080) |
| Algahtany, Kumar et al. 2022 -b <sup>2</sup>  | Makkah, Saudi Arabia                                | 1.004 (1.002, 1.005) | 1.038 (0.995, 1.081) |
| Li, Feng et al. 2023 <sup>28</sup>            | 140 countries and regions                           | 1.021 (1.021, 1.021) | 1.035 (0.991, 1.079) |
| Lynch, Stretesky et al. 2020 -a <sup>31</sup> | New York, USA                                       | 1.000 (1.000, 1.000) | 1.039 (0.996, 1.081) |
| Lynch, Stretesky et al. 2020 -b <sup>31</sup> | London, UK                                          | 1.000 (1.000, 1.000) | 1.039 (0.996, 1.081) |
| Mares and Moffett 2016 <sup>37</sup>          | 57 countries                                        | 1.057 (1.035, 1.080) | 1.029 (0.986, 1.073) |
| Wei, Shao et al. 2022 <sup>75</sup>           | 171 countries                                       | 1.139 (1.132, 1.146) | 1.037 (0.993, 1.080) |
| <i>Overall</i>                                | -                                                   | 1.030 (0.990, 1.053) | -                    |

<sup>a</sup> Crime/violence risk for 1°C increase; <sup>b</sup> Pooled percentage increase after excluding the effect estimates

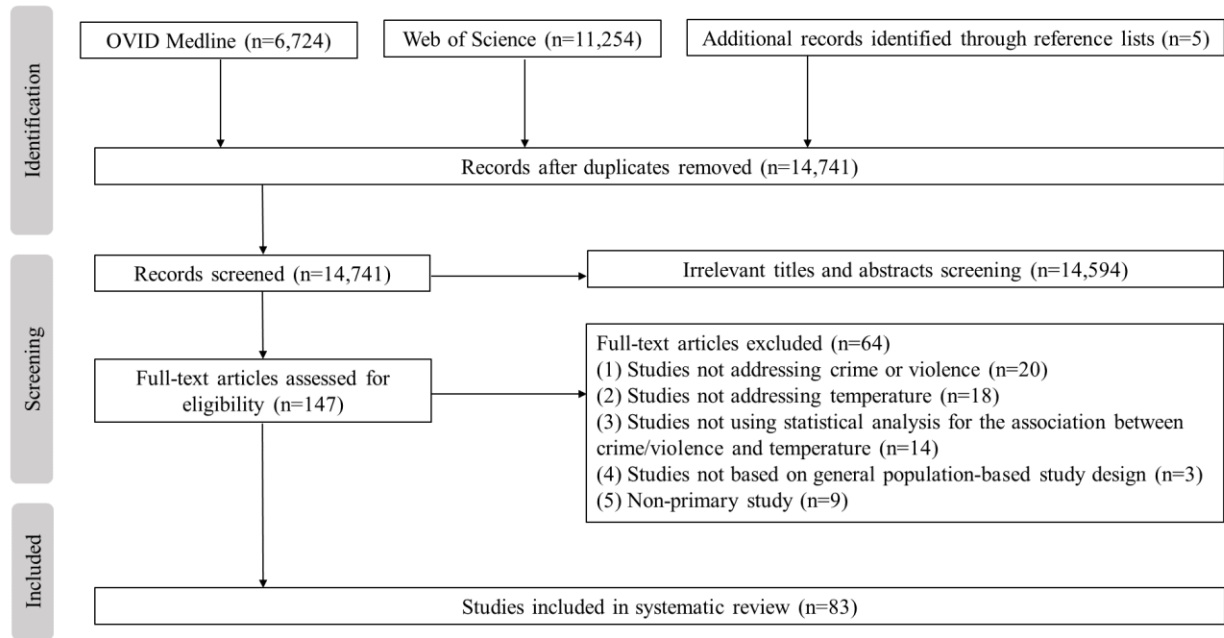

**Figure S1.** Flowchart of the study selection for systematic literature review of the association between temperature, crime and violence.

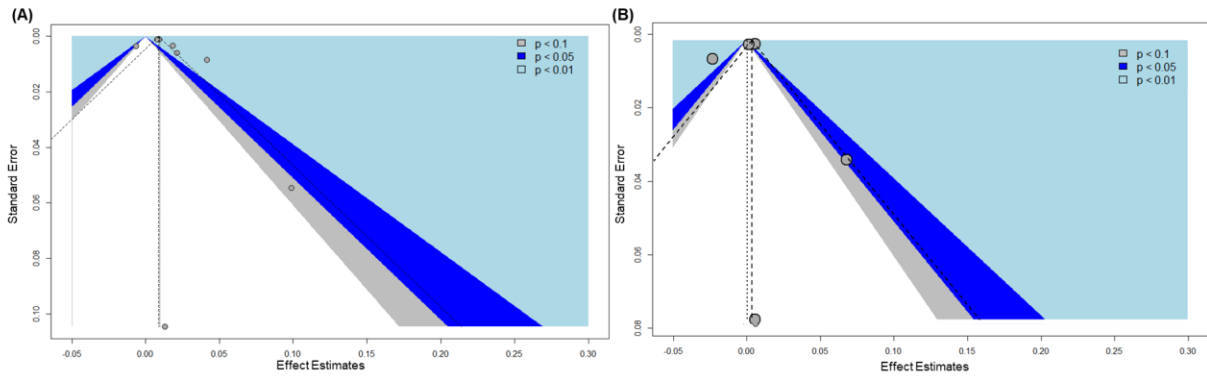

**Figure S2.** Contour-enhanced funnel plot analysis on the detection of publication bias in the meta-analysis of the short-term association between temperature and (A) violent crime and (B) property crime with background color indicating the significance of the studies ( $P \geq 0.05$ : white background;  $P < 0.05$ : dark blue;  $P < 0.025$ : blue;  $P < 0.01$ : light blue)

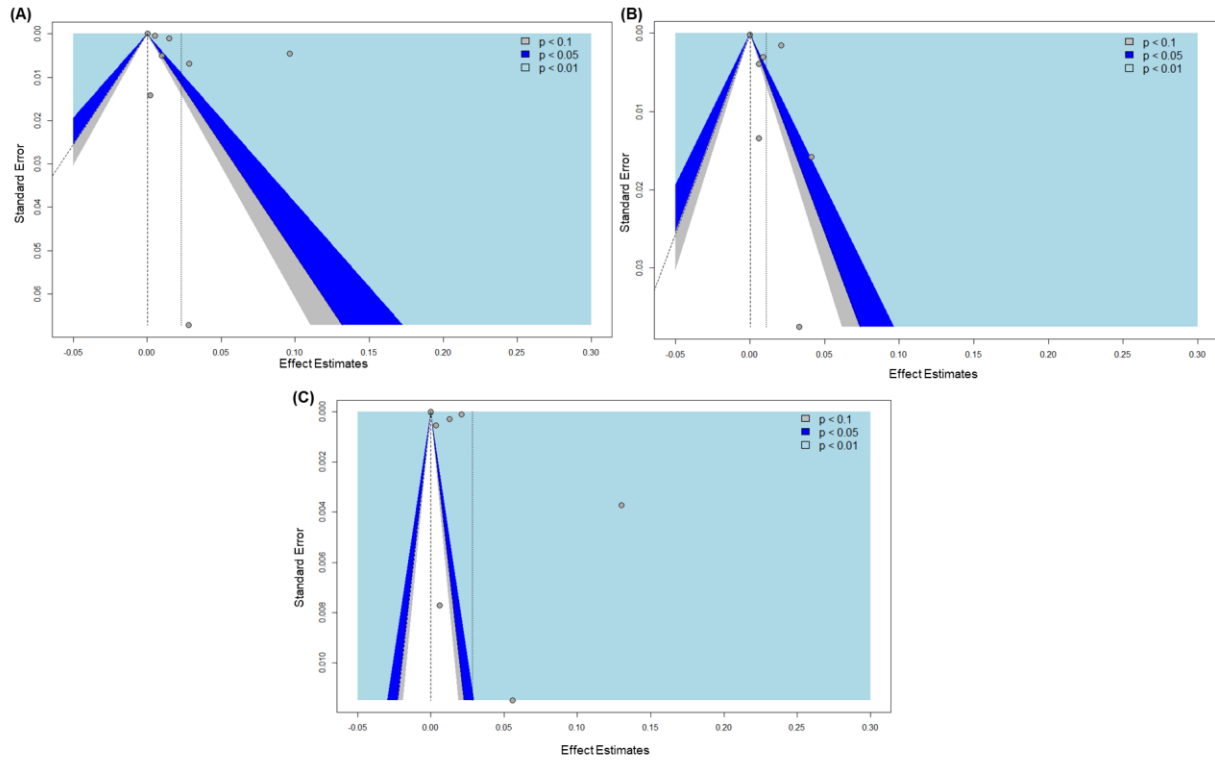

**Figure S3.** Contour-enhanced funnel plot analysis on the detection of publication bias in the meta-analysis of the short-term association between temperature and assault and homicide (A and B for assault and homicide, respectively) and C for long-term homicide, with background color indicating the significance of the studies ( $P \geq 0.05$ : white background;  $P < 0.05$ : dark blue;  $P < 0.025$ : blue;  $P < 0.01$ : light blue)

## References

1. OHAT Devison of the National Toxicology Program. <https://ntp.niehs.nih.gov/whatwestudy/assessments/noncancer/riskbias>. Accessed 2024.09.19.
2. Algahtany M, Kumar L, Barclay E. A tested method for assessing and predicting weather-crime associations. *Environmental Science and Pollution Research*. 2022;29(49):75013-75030.
3. Annan-Phan S, Ba BA. Hot temperatures, aggression, and death at the hands of the police: Evidence from the U.S. *Journal of Urban Economics*. 2023:103592.
4. Auliciems A, DiBartolo L. Domestic Violence in a subtropical environment: Police calls and weather in Brisbane. *International Journal of Biometeorology*. 1995;39(1):34-39.
5. Baryshnikova N, Davidson S, Wesselbaum D. Do you feel the heat around the corner? The effect of weather on crime. *Empirical Economics*. 2022;63(1):179-199.
6. Berman JD, Bayham J, Burkhardt J. Hot under the collar: A 14-year association between temperature and violent behavior across 436 U.S. counties. *Environmental Research*. 2020;191:110181.
7. Bollfrass A, Shaver A. The Effects of Temperature on Political Violence: Global Evidence at the Subnational Level. *PLOS ONE*. 2015;10(5):e0123505.
8. Butke P, Sheridan SC. An Analysis of the Relationship between Weather and Aggressive Crime in Cleveland, Ohio. *Weather, Climate, and Society*. 2010;2(2):127-139.
9. Castle Y, Kovacs J. Sizing up Crime and Weather Relationships in a Small Northern City. *Canadian Journal of Criminology and Criminal Justice*. 2023;65(1):60-79.
10. Chambru C. Weather shocks, poverty and crime in 18th-century Savoy. *Explorations in Economic History*. 2020;78:101353.
11. Churchill SA, Smyth R, Trinh TA. Crime, Weather and Climate Change in Australia. *Economic Record*. 2023;99(324):84-107.
12. Cohn EG, Rotton J. WEATHER, SEASONAL TRENDS AND PROPERTY CRIMES IN MINNEAPOLIS, 1987–1988. A MODERATOR-VARIABLE TIME-SERIES ANALYSIS OF ROUTINE ACTIVITIES. *Journal of Environmental Psychology*. 2000;20(3):257-272.
13. Corcoran J, Zahnow R. The Effect of Weather on Assault. *Environment and Behavior*. 2022;54(2):300-326.
14. Cruz E, D'Alessio SJ, Stolzenberg L. The Effect of Maximum Daily Temperature on Outdoor Violence. *Crime & Delinquency*. 2023;69(6-7):1161-1182.
15. DeFronzo J. Climate and Crime: Tests of an FBI Assumption. *Environment and Behavior*. 1984;16(2):185-210.
16. Field S. THE EFFECT OF TEMPERATURE ON CRIME. *The British Journal of Criminology*. 1992;32(3):340-351.
17. Gamble JL, Hess JJ. Temperature and violent crime in dallas, Texas: relationships and implications of climate change. *West J Emerg Med*. 2012;13(3):239-246.
18. Gates A, Klein M, Acquattro F, Garland RM, Scovronick N. Short-term association between ambient temperature and homicide in South Africa: a case-crossover study. *Environmental Health*. 2019;18(1):109.
19. Heilmann K, Kahn ME, Tang CK. The urban crime and heat gradient in high and low poverty areas. *Journal of Public Economics*. 2021;197:104408.
20. Hodgkinson T, Corcoran J, Andresen MA. Violent assault geographies in northeastern Australia. *Plos One*. 2023;18(3).
21. Hou K, Zhang L, Xu X, et al. High ambient temperatures are associated with urban crime risk in Chicago. *Science of The Total Environment*. 2023;856:158846.
22. Hu X, Wu J, Chen P, Sun T, Li D. Impact of climate variability and change on crime rates in Tangshan, China. *Science of The Total Environment*. 2017;609:1041-1048.

23. Jung Y, Kim D, Piquero AR. Spatiotemporal Association Between Temperature and Assaults: A Generalized Linear Mixed-Model Approach. *Crime & Delinquency*. 2020;66(2):277-302.
24. Jung Y, Chun Y, Griffith DA. Temperature and assault in an urban environment: An empirical study in the city of Seoul, South Korea. *Applied Geography*. 2020;124:102340.
25. Kim SE, Kim Y, Hashizume M, et al. Positive Association of Aggression with Ambient Temperature. *Yale Journal of Biology and Medicine*. 2023;96(2):189-196.
26. Le VTH, Berman JD, Tran QA, Wattenberg EV, Alexander BH. The Effects of Daily Temperature on Crime Events in Urban Hanoi, Vietnam Using Seven Years of Data (2013&ndash;2019). *International Journal of Environmental Research and Public Health*. 2022;19(21):13906.
27. Lemon DJ, Partridge R. Is weather related to the number of assaults seen at emergency departments? *Injury*. 2017;48(11):2438-2442.
28. Li J, Feng C, Yang J. Climate attribution of interpersonal violence: International evidence. *Environmental Research*. 2023;236.
29. Linning SJ, Andresen MA, Brantingham PJ. Crime Seasonality: Examining the Temporal Fluctuations of Property Crime in Cities With Varying Climates. *International Journal of Offender Therapy and Comparative Criminology*. 2017;61(16):1866-1891.
30. Linning SJ, Andresen MA, Ghaseminejad AH, Brantingham PJ. Crime Seasonality across Multiple Jurisdictions in British Columbia, Canada. *Canadian Journal of Criminology and Criminal Justice*. 2017;59(2):251-280.
31. Lynch MJ, Stretesky PB, Long MA. Climate Change, Temperature, and Homicide: A Tale of Two Cities, 1895–2015. *Weather, Climate, and Society*. 2020;12(1):171-181.
32. Lynch MJ, Stretesky PB, Long MA, Barrett KL. The Climate Change-Temperature-Crime Hypothesis: Evidence from a Sample of 15 Large US Cities, 2002 to 2015. *International Journal of Offender Therapy and Comparative Criminology*. 2022;66(4):430-450.
33. Lyons VH, Gause EL, Spangler KR, Wellenius GA, Jay J. Analysis of Daily Ambient Temperature and Firearm Violence in 100 US Cities. *Jama Network Open*. 2022;5(12).
34. Mapou AEMMSP, Shendell DMPHD, Ohman-Strickland PMSP, et al. Environmental Factors and Fluctuations in Daily Crime Rates. *Journal of Environmental Health*. 2017;80(5):8-23.
35. Mares D. Climate change and levels of violence in socially disadvantaged neighborhood groups. *J Urban Health*. 2013;90(4):768-783.
36. Mares D. Climate change and crime: monthly temperature and precipitation anomalies and crime rates in St. Louis, MO 1990–2009. *Crime, Law and Social Change*. 2013;59(2):185-208.
37. Mares DM, Moffett KW. Climate change and interpersonal violence: a “global” estimate and regional inequities. *Climatic Change*. 2016;135(2):297-310.
38. Mares DM, Moffett KW. Climate Change and Crime Revisited: An Exploration of Monthly Temperature Anomalies and UCR Crime Data. *Environment and Behavior*. 2019;51(5):502-529.
39. Maystadt J-F, Calderone M, You L. Local warming and violent conflict in North and South Sudan. *Journal of Economic Geography*. 2014;15(3):649-671.
40. McLean I. Climatic effects on incidence of sexual assault. *Journal of Forensic and Legal Medicine*. 2007;14(1):16-19.
41. Michel SJ, Wang H, Selvarajah S, et al. Investigating the relationship between weather and violence in Baltimore, Maryland, USA. *Injury*. 2016;47(1):272-276.
42. Muzafar Shah H. THE EFFECTS OF WEATHER ON CRIME RATES IN MALAYSIA. *International Journal of Business and Society*. 2017;18(2).
43. O’Loughlin J, Linke AM, Witmer FDW. Effects of temperature and precipitation variability on the risk of violence in sub-Saharan Africa, 1980–2012. *Proceedings of the National Academy of Sciences*. 2014;111(47):16712-16717.



44. O'Loughlin J, Witmer FDW, Linke AM, Laing A, Gettelman A, Dudhia J. Climate variability and conflict risk in East Africa, 1990–2009. *Proceedings of the National Academy of Sciences*. 2012;109(45):18344-18349.
45. Otrachshenko V, Popova O, Tavares J. EXTREME TEMPERATURE AND EXTREME VIOLENCE: EVIDENCE FROM RUSSIA. *Economic Inquiry*. 2021;59(1):243-262.
46. Pacillo G, Kangogo D, Madurga-Lopez I, Villa V, Belli A, Läderach P. Is climate exacerbating the root causes of conflict in Mali? A climate security analysis through a structural equation modeling approach. *Frontiers in Climate*. 2022;4.
47. Peng C, Xueming S, Hongyong Y, Dengsheng L. Assessing temporal and weather influences on property crime in Beijing, China. *Crime, Law and Social Change*. 2011;55(1):1-13.
48. Peng J, Zhan Z. Extreme climate and crime: Empirical evidence based on 129 prefecture-level cities in China. *Frontiers in Ecology and Evolution*. 2022;10.
49. Potgieter A, Fabris-Rotelli IN, Breetzke G, Wright CY. The association between weather and crime in a township setting in South Africa. *International Journal of Biometeorology*. 2022;66(5):865-874.
50. Rahman MM, Lorenzo M, Ban-Weiss G, et al. Ambient temperature and air pollution associations with suicide and homicide mortality in California: A statewide case-crossover study. *Science of the Total Environment*. 2023;874.
51. Ranson M. Crime, weather, and climate change. *Journal of Environmental Economics and Management*. 2014;67(3):274-302.
52. Reeping PM, Hemenway D. The association between weather and the number of daily shootings in Chicago (2012–2016). *Injury Epidemiology*. 2020;7(1):31.
53. Rotton J, Cohn EG. Outdoor Temperature, Climate Control, and Criminal Assault: The Spatial and Temporal Ecology of Violence. *Environment and Behavior*. 2004;36(2):276-306.
54. Rotton J, Cohn E. Violence is a curvilinear function of temperature in Dallas: A replication. *Journal of personality and social psychology*. 2000;78:1074-1081.
55. Ruderman D, Cohn EG. Predictive Extrinsic Factors in Multiple Victim Shootings. *J Prim Prev*. 2021;42(1):59-75.
56. Sanz-Barbero B, Linares C, Vives-Cases C, González JL, López-Ossorio JJ, Díaz J. Heat wave and the risk of intimate partner violence. *Science of The Total Environment*. 2018;644:413-419.
57. Schinasi LH, Hamra GB. A Time Series Analysis of Associations between Daily Temperature and Crime Events in Philadelphia, Pennsylvania. *J Urban Health*. 2017;94(6):892-900.
58. Schutte FH, Breetzke GD. The influence of extreme weather conditions on the magnitude and spatial distribution of crime in Tshwane (2001–2006). *South African Geographical Journal*. 2018;100(3):364-377.
59. Schutte FH, Breetzke GD, Edlstein I. The Relationship Between Temperature and Crime on the Cape Flats of South Africa. *International Journal of Criminal Justice Sciences*. 2021;16(1):127-145.
60. Shen B, Hu X, Wu H. Impacts of climate variations on crime rates in Beijing, China. *Science of The Total Environment*. 2020;725:138190.
61. Sommer AJ, Lee M, Bind M-AC. Comparing apples to apples: an environmental criminology analysis of the effects of heat and rain on violent crimes in Boston. *Palgrave Communications*. 2018;4(1):138.
62. Sorg ET, Taylor RB. Community-level impacts of temperature on urban street robbery. *Journal of Criminal Justice*. 2011;39(6):463-470.
63. Stechemesser A, Levermann A, Wenz L. Temperature impacts on hate speech online: evidence from 4 billion geolocated tweets from the USA. *The Lancet Planetary Health*. 2022;6(9):e714-e725.

64. Stevens HR, Beggs PJ, Graham PL, Chang H-C. Hot and bothered? Associations between temperature and crime in Australia. *International Journal of Biometeorology*. 2019;63(6):747-762.
65. Stevens HR, Graham PL, Beggs PJ, Hanigan IC. In Cold Weather We Bark, But in Hot Weather We Bite: Patterns in Social Media Anger, Aggressive Behavior, and Temperature. *Environment and Behavior*. 2021;53(7):787-805.
66. Stevens HR, Graham PL, Beggs PJ, Hanigan IC. No retreat from the heat: temperature-related risk of violent assault is increased by being inside. *International Journal of Urban Sciences*. 2023.
67. Takahashi RYO. CLIMATE, CRIME, AND SUICIDE: EMPIRICAL EVIDENCE FROM JAPAN. *Climate Change Economics*. 2017;08(01):1750003.
68. Talaei A, Hedjazi A, Rezaei Ardani A, Fayyazi Bordbar MR, Talaei A. The Relationship between Meteorological Conditions and Homicide, Suicide, Rage, and Psychiatric Hospitalization. *Journal of Forensic Sciences*. 2014;59(5):1397-1402.
69. Tiihonen J, Halonen P, Tiihonen L, Kautiainen H, Storvik M, Callaway J. The Association of Ambient Temperature and Violent Crime. *Scientific Reports*. 2017;7(1):6543.
70. Tol RSJ, Wagner S. Climate change and violent conflict in Europe over the last millennium. *Climatic Change*. 2010;99(1):65-79.
71. Towers S, Chen S, Malik A, Ebert D. Factors influencing temporal patterns in crime in a large American city: A predictive analytics perspective. *PLOS ONE*. 2018;13(10):e0205151.
72. Trujillo JC, Howley P. The Effect of Weather on Crime in a Torrid Urban Zone. *Environment and Behavior*. 2021;53(1):69-90.
73. van de Vliert E, Schwartz SH, Huismans SE, Hofstede G, Daan S. Temperature, Cultural Masculinity, and Domestic Political Violence: A Cross-National Study. *Journal of Cross-Cultural Psychology*. 1999;30(3):291-314.
74. van Weezel S. Local warming and violent armed conflict in Africa. *World Development*. 2020;126:104708.
75. Wei JC, Shao QW, Liu Y, Marinova D. Climate Change and Homicide: Global Analysis of the Moderating Role of Information and Communication Technology. *Weather Climate and Society*. 2022;14(4):1025-1037.
76. Wesselbaum D. Violent crimes and homicide in New York City: The role of weather and pollution. *Journal of forensic and legal medicine*. 2022;91:102430.
77. Williams A, McDonogh-Wong L, Spengler JD. The Influence of Extreme Heat on Police and Fire Department Services in 23 U.S. Cities. *GeoHealth*. 2020;4(11):e2020GH000282.
78. Williams AA, Allen JG, Catalano PJ, Buonocore JJ, Spengler JD. The Influence of Heat on Daily Police, Medical, and Fire Dispatches in Boston, Massachusetts: Relative Risk and Time-Series Analyses. *Am J Public Health*. 2020;110(5):662-668.
79. Williams MN, Hill SR, Spicer J. The relationship between temperature and assault in New Zealand. *Climatic Change*. 2015;132(4):559-573.
80. Wu CYH, Lee HF, Liu H. Effect of temperature and precipitation change on crime in the metropolitan area in Virginia, USA. *Asian Geographer*. 2020;37(1):17-31.
81. Xu R, Xiong X, Abramson MJ, Li S, Guo Y. Ambient temperature and intentional homicide: A multi-city case-crossover study in the US. *Environment International*. 2020;143:105992.
82. Yiannakoulis N, Kielasinska E. The effect of temperature on arson incidence in Toronto, Ontario, Canada. *International Journal of Biometeorology*. 2016;60(5):651-661.
83. Yu C-H, Mu JE, Ding J, McCarl BA. Relationships between typhoons, climate and crime rates in Taiwan. *Natural Hazards*. 2017;89(2):871-897.

84. Zhu Y, He C, Bell M, et al. Association of Ambient Temperature With the Prevalence of Intimate Partner Violence Among Partnered Women in Low- and Middle-Income South Asian Countries. *JAMA Psychiatry*.80(9):952-961.
