# Supplementary material
Source: PubMed Central journal article supplement (PMC11477092)
Supplement: ehp14300.smcontents.508.pdf [file ehp14300.smcontents.508.pdf]

**Note to readers with disabilities:** *EHP* strives to ensure that all journal content is accessible to all readers. However, some figures and Supplemental Material published in *EHP* articles may not conform to [508 standards](#) due to the complexity of the information being presented. If you need assistance accessing journal content, please contact [ehpsubmissions@niehs.nih.gov](mailto:ehpsubmissions@niehs.nih.gov). Our staff will work with you to assess and meet your accessibility needs within 3 working days.

### **Supplemental Material**

#### **Temperature, Crime, and Violence: A Systematic Review and Meta-Analysis**

Hayon Michelle Choi, Seulkee Heo, Damien Foo, Yimeng Song, Rory Stewart, Jiyoung Son, and Michelle L. Bell

#### **Table of Contents**

**Table S1.** Search strategies and initial results for systematic literature review of the association between temperature, crime and violence, organized by database.

**Table S2.** Criteria for the risk of bias assessment for included studies, adapted from the Office of Health Assessment and Translation (OHAT), for systematic literature review of the association between temperature, crime and violence.

**Table S3.** Summary of the included studies for systematic literature review of the association between temperature, crime and violence.

**Table S4.** Summary of the association of the included studies for systematic literature review of the association between temperature, crime and violence.

**Table S5.** The summary of association of the included studies for systematic literature review of the association between temperature, crime and violence by geographical locations.

**Table S6.** Heat map for risk of bias rating and quality rating for the included studies for systematic literature review of the association between temperature, crime and violence.

**Table S7.** Details of risk of bias assessment for included studies for systematic literature review of the association between temperature, crime and violence.

**Table S8.** Summary of the studies included in meta-analysis and sensitivity analysis for systematic literature review of the association between temperature, crime and violence.

**Figure S1.** Flowchart of the study selection for systematic literature review of the association between temperature, crime and violence.

**Figure S2.** Contour-enhanced funnel plot analysis on the detection of publication bias in the meta-analysis of the short-term association between temperature and (A) violent crime and (B) property crime with background color indicating the significance of the studies ( $P \geq 0.05$ : white background;  $P < 0.05$ : dark blue;  $P < 0.025$ : blue;  $P < 0.01$ : light blue).

**Figure S3.** Contour-enhanced funnel plot analysis on the detection of publication bias in the meta-analysis of the short-term association between temperature and assault and homicide (A and B for assault and homicide, respectively) and C for long-term homicide, with background color indicating the significance of the studies ( $P \geq 0.05$ : white background;  $P < 0.05$ : dark blue;  $P < 0.025$ : blue;  $P < 0.01$ : light blue).

## References
